# Supplementary material for: Effect of cryopreservation and semen extender on extracellular vesicles isolated from bull semen
Source: Front Vet Sci. 2024 Jul 30;11:1437410. doi: 10.3389/fvets.2024.1437410 (PMC11321215; doi:10.3389/fvets.2024.1437410)
Supplement: Supplementary Table S1 — Progeny data and production, functionality, and type (PFT) index of bulls of proven fertility. [file Table_1.XLSX]

## Sheet: Foglio1
Bull	Fertility	PFT1	Reliability
1	110	4386	0.78
2	106	4530	0.78
3	105	4536	0.78
4	111	4628	0.78
5	103	4709	0.81
1 PFT: Production, Fertility and Type. IS the main selection index for the Italian Holstein Fresian breed developed by ANAFIBJ
