# Supplementary material for: Effect of cryopreservation and semen extender on extracellular vesicles isolated from bull semen
Source: Front Vet Sci. 2024 Jul 30;11:1437410. doi: 10.3389/fvets.2024.1437410 (PMC11321215; doi:10.3389/fvets.2024.1437410)
Supplement: Supplementary Table S2 — Characteristics of semen of proven bulls on pre-freeze and post-thaw samples. [file Table_2.XLSX]

## Sheet: Foglio1
	Pre-freeze quality			Post-thaw quality
Bull	Volume (ml)	Conc/ml	MOT_TOT_subjective (%)	MOT_TOT _CASA (%)	PROG (%)	VSL (µm/s)	VCL (µm/s)	VAP (µm/s)	LIN (%)	STR (%)	WOB (%)	ALH (µm)	BCF (Hz)
		(x106)
1	5,14	1188	0.8	77,8	40,9	44,3	86,3	57,2	51,4	77,6	66,2	3,2	7,4
2	3,96	790	0.8	68,6	36	40,1	72,4	50,3	55,4	79,7	69,5	2,8	6,8
3	3,53	770	0.85	70,2	38,1	43,3	77,6	53,1	55,8	81,5	68,5	2,9	8,7
4	3,16	575	0.77	65,3	34	38,7	71,3	49,8	53,1	76,4	66,4	2,5	6,6
5	4,95	997	0.8	76,5	39,8	44,1	85,8	56,9	51,2	76,1	63,3	3,0	7,2
MOT_TOT_CASA, total motility; PROG, cells progressive motility; VSL, straight-line velocity; VCL, curvilinear velocity; VAP, average path velocity; LIN, linear coefficient; STR, straightness coefficient; WOB, wobble coefficient; ALH, amplitude of lateral head displacement; BCF, beat cross-frequency;
