# Supplementary material for: Effect of cryopreservation and semen extender on extracellular vesicles isolated from bull semen
Source: Front Vet Sci. 2024 Jul 30;11:1437410. doi: 10.3389/fvets.2024.1437410 (PMC11321215; doi:10.3389/fvets.2024.1437410)
Supplement: Supplementary Table S3 — SiMoA analysis reporting the average number of enzymes per bead (AEB), and the relative p-value for the comparison between the different preparations (SP-EVs, SPE-EVs, and S-EVs) and the extender (E-EVs) for UC and SEC isolation methods. [file Table_3.XLSX]

## Sheet: Foglio1
AEB ± SD	AEB ± SD
	SP-EVs (Mean± SD)	SPE-EVs (Mean± SD)	S-EVs (Mean± SD)	E-EVs (Mean± SD)
UC	0.088767 ± 0.0236	0.053067 ± 0.0008	0.0373 ± 0.0017	0.022567 ± 0.0002
SEC	0.093233 ± 0.0780	0.034533 ± 0.0016	0.034533 ± 0.0024	0.0207 ± 0.0039
	P- value
	SP-EVs vs E-E-EVs	SPE-EVsvs E-E-EVs	S-EVsvs E-E-EVs
UC	0.0084	<0,0001	0,0001
SEC	0.1834	0.001	0.0068
