# Supplementary material for: Effect of cryopreservation and semen extender on extracellular vesicles isolated from bull semen
Source: Front Vet Sci. 2024 Jul 30;11:1437410. doi: 10.3389/fvets.2024.1437410 (PMC11321215; doi:10.3389/fvets.2024.1437410)
Supplement: Supplementary Table S4 — Sequencing statistics. [file Table_4.XLSX]

## Sheet: Foglio1
Isolate EVs	isolation method	Replicate	Total reads	QC-passed reads	miRNA reads	% miRNA identified
SP-EVs	UF	pool 1	29057493	28371430	18069536	63.6892
SP-EVs	UF	pool 2	26798299	25927953	14454055	55.747
SP-EVs	UF	pool 3	21886318	21248181	12427515	58.4874
SP-EVs	SEC	pool 1	28340245	27025636	6354528	23.513
SP-EVs	SEC	pool 2	18439198	17495958	3813096	21.7942
SP-EVs	SEC	pool 3	13375460	12720850	2852834	22.4264
SPE-EVs	UF	pool 1	37190534	35169152	11512365	32.7343
SPE-EVs	UF	pool 2	6829338	6386157	674360	10.5597
SPE-EVs	UF	pool 3	46226224	43787897	13093259	29.9015
SPE-EVs	SEC	pool 1	37626948	35411143	5712479	16.1319
SPE-EVs	SEC	pool 2	9770204	9206651	1695490	18.4159
SPE-EVs	SEC	pool 3	9504952	9048772	1824131	20.1589
S-EVs	UF	pool 1	18313974	17227713	3158372	18.3331
S-EVs	UF	pool 2	30881777	29403238	10404313	35.3849
S-EVs	UF	pool 3	12738400	12036550	3841675	31.9167
S-EVs	SEC	pool 1	27920023	26525580	8523576	32.1334
S-EVs	SEC	pool 2	4086508	3847586	807797	20.9949
S-EVs	SEC	pool 3	33033097	30996902	7417745	23.9306
E-EVs	UF	pool 1	3150869	2924375	14465	0.494636
E-EVs	UF	pool 2	42946351	39517178	18953	0.0479614
E-EVs	UF	pool 3	41286702	38072025	18874	0.0495745
E-EVs	SEC	pool 1	28087020	26193336	24569	0.0937987
E-EVs	SEC	pool 2	22487625	20720293	22818	0.110124
E-EVs	SEC	pool 3	19659598	18200996	18039	0.09911
