# Supplementary material for: Effect of cryopreservation and semen extender on extracellular vesicles isolated from bull semen
Source: Front Vet Sci. 2024 Jul 30;11:1437410. doi: 10.3389/fvets.2024.1437410 (PMC11321215; doi:10.3389/fvets.2024.1437410)
Supplement: Supplementary Table S5 — miRNA counts identified by MiRDeep2 and its modules. [file Table_5.XLSX]

## Sheet: miRNA count
miRNA	S-EVs_UC_1	S-EVs_UC_2	S-EVs_UC_3	S-EVs_SEC_1	S-EVs_SEC_2	S-EVs_SEC_3	SP-EVs_UC_1	SP-EVs_UC_2	SP-EVs_UC_3	SP-EVs_SEC_1	SP-EVs_SEC_2	SP-EVs_SEC_3	SPE-EVs_UC_1	SPE-EVs_UC_2	SPE-EVs_UC_3	SPE-EVs_SEC_1	SPE-EVs_SEC_2	SPE-EVs_SEC_3	E-EVs_UC_1	E-EVs_UC_2	E-EVs_UC_3	E-EVs_SEC_1	E-EVs_SEC_2	E-EVs_SEC_3
bta-miR-26a	19794	109934	36538	114149	9488	99194	139762	90646	118764	62215	33478	24163	137366	9054	143216	67896	21985	18912	149	205	181	207	89	64
bta-miR-18b	0	0	0	1	0	0	0	0	0	0	0	0	0	4	2	0	0	0	5	1	12	0	0	0
bta-miR-29a	9340	34534	11300	28903	1973	27280	44658	77585	33264	20211	11780	5788	31472	1913	31900	12701	4374	3728	41	44	48	24	31	21
bta-let-7f	60593	435302	158707	339603	33219	322617	370701	291276	468936	203883	135831	147665	576704	24962	471293	243656	62043	54684	486	435	532	524	676	839
bta-miR-101	287	1096	274	2273	185	2633	1924	1352	1596	281	468	382	1483	73	437	1090	262	284	5	1	1	0	2	3
bta-miR-103	24613	65280	29428	30463	2285	32090	85246	98964	40765	23713	12949	11614	57253	4167	64046	15676	4804	5835	59	87	104	40	232	43
bta-miR-148a	43021	285014	111516	281141	30716	158240	409617	313364	475636	221725	146345	114422	402435	22151	462706	223418	54010	57738	449	597	535	514	687	534
bta-miR-151-5p	401	1378	312	2214	160	358	2628	1958	1912	1379	449	287	1191	160	1973	309	323	140	2	2	4	2	4	1
bta-miR-151-3p	6102	17524	6339	11022	1289	10262	31483	21181	20948	8076	4545	5632	18078	1110	18814	8831	1797	1991	27	31	15	14	20	154
bta-miR-16b	600	5478	1841	4891	215	3895	3586	1334	2670	789	874	648	5667	416	4930	2101	501	682	4	19	6	6	160	2
bta-miR-18a	0	0	0	1	0	0	0	0	0	0	0	0	0	3	0	0	0	0	0	0	0	0	0	0
bta-miR-20a	464	1789	620	2731	202	1742	821	632	1033	706	0	500	2313	158	2566	986	529	297	2	1	3	1	1	0
bta-miR-21-5p	27014	235444	85761	206167	16093	166666	103909	62009	135481	52818	36009	38178	320479	12845	274624	149635	45074	49518	229	518	363	482	695	251
bta-miR-21-3p	0	0	0	0	0	0	0	0	87	0	0	0	0	0	0	0	0	0	0	0	0	0	0	0
bta-miR-221	11714	23288	7828	11344	1011	11342	20010	25680	15196	8676	2646	2984	22115	1633	25618	5857	1929	2434	21	44	40	89	19	8
bta-miR-222	343	1382	447	935	117	750	2914	1695	1070	503	335	337	1452	137	1980	443	44	213	0	1	2	0	1	0
bta-miR-26b	38177	136051	43179	131485	11363	127867	85611	117759	165468	70840	38384	26572	138920	10828	167464	55328	19135	12551	179	180	141	119	95	178
bta-miR-27a-5p	0	28	68	0	0	0	59	120	0	0	0	0	46	0	118	0	12	0	0	0	0	0	0	0
bta-miR-27a-3p	1	453	137	853	49	139	403	861	287	374	0	45	351	33	376	1	57	40	2	1	1	0	306	0
bta-miR-30d	95243	243677	94711	178667	13887	191082	432154	351902	172070	125958	75977	45629	236459	13695	300714	89694	30359	40033	300	362	294	840	212	170
bta-miR-320a	12488	8037	2675	4950	433	3554	17527	20550	9171	7172	3495	1555	4929	634	9400	1964	963	1071	30	73	20	288	831	287
bta-miR-484	384	47	76	178	4	50	167	192	0	0	1	181	456	8	200	1	0	66	0	1	0	0	0	0
bta-miR-499	0	43	0	61	11	39	105	0	0	173	0	1	55	6	0	0	0	0	0	0	0	0	0	0
bta-miR-99a-5p	5221	9658	4199	5564	478	4846	7734	14503	8345	4495	3768	1802	13992	653	15335	5498	1486	1992	14	13	10	5	6	7
bta-miR-99a-3p	0	0	17	32	13	0	2	0	0	0	0	0	20	0	92	0	0	0	0	0	0	0	0	0
bta-miR-125a	55905	111014	49575	91225	6890	108145	297484	287356	118631	72147	43788	25976	100295	6200	133254	42430	15393	14856	159	160	204	130	327	94
bta-miR-125b	305892	570991	217700	373657	25609	409550	1051378	1344439	471358	322365	180804	98297	423541	30617	533340	144289	48748	47228	723	722	782	703	580	400
bta-miR-126-5p	0	84	47	245	18	130	11	0	88	0	0	0	227	0	234	128	64	3	0	0	0	0	1	0
bta-miR-126-3p	1	935	332	655	51	242	1076	1075	775	206	0	0	681	63	1013	159	31	0	2	33	2	1	0	1
bta-miR-128	357	1817	469	2126	99	1869	2228	1224	1520	541	593	237	1970	106	1612	1342	491	274	2	3	2	1	0	2
bta-miR-181a	3433	1729	902	658	150	651	3832	4497	1555	1315	427	553	4983	217	4861	1215	578	548	3	27	3	3	4	92
bta-miR-199a-5p	0	0	0	68	0	0	0	0	0	0	0	0	0	0	0	0	0	0	0	0	0	0	0	0
bta-miR-199a-3p	131	63	26	0	22	0	0	0	0	0	0	0	45	2	136	0	0	0	0	0	0	0	0	0
bta-miR-205	8205	12391	4886	8568	611	10609	17216	21194	9765	4680	2514	654	11335	635	11655	4042	1607	2108	62	201	75	612	623	527
bta-miR-27b	1273	7964	2296	7878	797	5953	14097	9608	6984	5022	1564	830	9407	828	11208	7214	1119	1126	6	44	8	14	194	3
bta-miR-30b-5p	601	3338	1014	5009	444	2587	3471	3919	2087	1442	925	634	3351	398	2947	1396	599	312	3	3	7	4	4	4
bta-miR-30b-3p	0	0	0	0	0	1	0	0	96	0	0	0	0	0	0	0	0	0	0	0	0	0	0	0
bta-miR-31	0	90	55	0	0	60	44	191	0	0	0	0	148	17	113	0	0	0	0	1	0	1	0	0
bta-miR-34b	1	105	1	4	0	61	3	4	2	209	2	1	71	1	8	1	0	0	0	0	0	0	0	0
bta-miR-107	2	845	196	743	42	299	673	1334	339	326	3	2	737	83	688	409	119	130	1	6	0	1	180	0
bta-miR-10a	103457	445731	175051	314194	24895	440831	563837	485014	387298	244161	180183	148873	557245	24313	603848	240109	76314	83610	518	484	604	785	531	390
bta-miR-127	87	0	11	0	0	0	67	0	0	0	0	0	0	0	0	0	0	0	0	0	0	0	0	0
bta-miR-139	0	42	0	0	0	0	98	0	143	0	0	0	82	10	0	0	0	0	0	0	0	0	0	0
bta-miR-140	1055	1959	766	2111	130	925	2100	1203	1450	877	349	312	1706	144	2941	958	322	93	6	2	2	5	0	1
bta-miR-142-5p	0	0	0	0	0	0	0	0	0	0	0	0	0	0	0	0	29	0	0	0	0	0	0	0
bta-miR-15b	991	3246	1013	1843	119	1396	1863	8341	1462	569	432	3	2821	286	2801	185	313	151	4	25	0	3	4	68
bta-miR-181b	217	113	75	31	37	78	230	0	156	0	0	0	339	40	419	181	169	73	0	0	0	0	125	0
bta-miR-193a-5p	233	596	273	106	12	599	1015	1241	417	158	94	284	138	60	574	154	64	1	0	0	2	0	0	1
bta-miR-193a-3p	0	0	0	0	0	0	0	0	0	0	0	0	0	2	0	0	0	0	0	0	0	0	0	0
bta-miR-20b	0	0	0	0	0	0	0	0	0	2	0	0	0	0	1	0	0	0	0	0	0	0	0	0
bta-miR-215	0	0	0	0	0	59	0	2	93	0	0	0	30	20	1	0	0	0	0	0	0	0	0	0
bta-miR-218	0	333	148	343	20	233	1	196	197	0	1	1	278	15	1	93	96	0	1	0	1	0	0	0
bta-miR-30e-5p	10808	25955	11439	31188	2383	25069	30437	22816	21618	11651	5985	4949	29211	2061	31829	12815	4422	4139	26	29	45	214	17	21
bta-miR-345-5p	0	195	84	69	0	71	64	168	118	0	0	0	238	31	173	2	0	0	0	0	0	0	0	0
bta-miR-345-3p	2	105	43	75	23	36	150	348	0	0	0	0	162	2	107	1	0	0	0	16	0	0	0	0
bta-miR-369-3p	0	0	0	0	8	0	0	0	0	0	0	0	0	0	0	0	0	0	0	0	0	0	0	0
bta-miR-380-5p	0	0	0	0	0	0	0	0	0	0	0	0	0	0	0	0	0	0	0	0	1	0	0	0
bta-miR-545-5p	0	0	0	66	0	0	1	1	1	0	0	0	0	2	111	0	0	0	0	0	0	0	0	0
bta-miR-545-3p	1	0	0	0	0	0	0	0	0	0	0	0	0	0	0	0	0	0	0	0	0	0	0	0
bta-miR-92a	875	3738	1562	4687	522	5005	9900	8555	4581	3826	1503	3011	7154	315	8572	3925	2351	2018	13	6	9	3	8	9
bta-miR-98	1275	8395	1593	7960	627	4827	7038	4984	10645	3274	2822	2231	9821	675	8843	5055	1047	1352	11	34	8	9	4	141
bta-let-7d	392	2412	934	3662	339	3669	5971	3442	3568	2296	606	931	3042	173	2123	1721	896	615	6	8	3	6	3	2
bta-miR-124a	0	0	0	0	0	1	74	0	0	0	0	0	0	0	0	0	0	0	0	0	0	0	0	0
bta-miR-132	0	47	0	157	0	18	0	0	135	167	0	0	206	8	252	74	55	48	0	1	0	0	0	0
bta-miR-138	160	0	0	0	0	0	0	0	0	0	0	0	0	0	0	0	0	0	0	0	0	0	0	0
bta-miR-148b	4450	11033	4754	5781	454	4295	11839	42369	8573	4461	2424	1379	10293	958	12170	3539	1076	809	16	16	18	12	9	13
bta-miR-17-5p	0	521	78	1003	72	201	758	758	238	660	0	124	464	81	148	589	56	87	1	1	0	1	0	0
bta-miR-181c	0	0	0	0	0	0	0	0	0	4	0	2	29	0	1	1	0	0	0	0	0	0	0	0
bta-miR-186	5056	11526	3260	7448	732	6661	8366	12391	7201	4251	2570	1010	8042	821	11781	2667	1046	772	10	10	12	8	9	1
bta-miR-191	48138	119092	48915	61296	5175	50024	134078	116413	52503	39776	24829	9060	98393	9647	115606	20103	6914	7741	129	115	151	79	185	135
bta-miR-192	838	1749	639	1573	136	1256	1483	1560	1608	868	762	1	1654	137	2388	575	145	180	1	1	3	1	0	2
bta-miR-199b	0	0	0	1	0	0	0	0	0	0	0	0	0	0	0	0	0	0	0	0	0	0	0	0
bta-miR-200a	71226	463106	147225	544639	46805	520010	445435	350212	558335	300147	154014	112368	657562	35436	649050	303614	107816	104209	660	699	683	434	1039	363
bta-miR-200c	50689	327612	104750	327667	34791	205993	784027	375333	409598	270646	158797	88748	373041	19368	520536	285821	86867	104806	496	514	516	774	808	344
bta-miR-210	961	1262	473	630	62	531	1344	1800	538	43	0	128	1069	105	922	1	81	118	2	2	1	0	3	0
bta-miR-214	0	0	0	0	0	1	0	0	0	0	1	0	0	0	0	0	0	20	0	0	0	0	0	0
bta-miR-22-5p	130	196	57	0	0	63	151	0	0	0	0	136	175	12	290	140	0	1	0	0	0	0	0	0
bta-miR-22-3p	685	1015	272	471	96	611	1514	1300	1008	1527	937	155	758	54	1018	506	199	88	0	2	1	1	1	3
bta-miR-23a	2607	5176	1940	6224	521	4962	10786	8671	5389	3484	2270	789	5394	417	7198	2901	1104	1009	69	389	225	408	904	375
bta-miR-29b	549	7279	1528	15163	1336	8513	7660	8099	11704	6021	1593	1447	8832	624	9705	6310	2292	1301	11	8	15	13	137	3
bta-miR-29c	18451	65865	22350	74381	5222	60139	86002	179434	89076	55886	42559	13107	64507	4028	72748	26967	9030	5458	101	111	115	67	69	55
bta-miR-361	863	3144	818	3855	219	4541	8240	6159	2503	2306	1490	1069	3534	162	3849	1534	604	450	4	6	0	6	7	170
bta-miR-423-5p	17213	14899	4869	12239	1184	8239	45289	42502	39183	16100	6376	4399	10947	926	27617	12106	3091	4772	28	28	32	17	22	224
bta-miR-423-3p	2497	1808	691	1191	173	910	4008	3851	3388	1936	696	678	2284	167	3220	1515	237	656	2	3	4	3	0	1
bta-miR-425-5p	278	493	157	371	30	88	380	632	484	151	0	1	657	21	779	45	29	58	0	0	1	0	0	0
bta-miR-425-3p	0	155	124	58	0	131	539	307	100	215	0	0	157	19	228	1	0	0	0	1	0	0	0	0
bta-miR-455-5p	0	0	0	0	0	0	0	0	0	0	0	0	0	0	0	0	29	0	0	0	0	0	0	0
bta-miR-455-3p	0	53	0	0	0	0	0	1	103	0	0	0	0	6	0	0	0	0	0	0	0	0	0	0
bta-miR-93	1634	4061	2083	6317	367	3911	4800	4435	2968	2547	685	991	6190	441	5561	1353	727	439	2	4	2	2	3	2
bta-let-7g	1992	14954	4006	14358	1568	10042	14520	10237	18804	6641	3992	2518	14203	1164	12164	7725	2098	1968	18	12	11	22	15	24
bta-miR-10b	48574	225455	95331	151662	12619	235615	274294	211373	176646	119246	95165	75543	303504	12420	320334	116263	39568	45504	279	254	326	425	494	144
bta-miR-24-3p	421	1798	591	1053	182	775	2542	1620	1756	1952	760	0	1431	102	2288	2497	266	367	1	2	10	2	1	2
bta-miR-30a-5p	15412	70283	24853	51736	3501	52899	102809	120184	54739	39981	26869	16600	69680	3658	63934	27264	8159	9379	77	97	99	61	68	48
bta-miR-200b	8889	73930	22997	88154	7554	77887	68503	41830	78987	44574	24110	14434	108934	5894	103250	51705	17478	14487	93	99	92	71	56	47
bta-miR-7	1390	8033	3964	6006	430	7316	7564	10023	5779	2029	2646	1983	8839	447	8365	2773	952	690	13	34	125	268	159	1279
bta-let-7a-5p	353406	2058263	715626	1729610	182189	1234794	2870706	2133296	2731615	1195606	723045	685556	2536535	143671	2824278	1268334	350927	340705	2609	2786	2816	4142	3328	2761
bta-miR-150	0	147	160	118	0	1	244	2	310	130	217	0	299	13	349	0	4	0	0	1	0	1	0	0
bta-miR-342	13357	39439	14526	45888	3291	38483	102653	69094	40092	39834	23844	8843	37363	1765	47614	25563	8494	9633	83	63	62	35	49	31
bta-miR-532	771	1875	849	967	76	1240	2270	2453	621	355	446	492	2256	135	2718	19	170	208	5	1	3	0	3	1
bta-miR-122	124	365	142	0	0	112	276	0	0	0	0	0	166	3	82	0	40	30	0	0	0	0	1	0
bta-miR-30c	2051	4251	1283	3239	289	2852	3131	3729	1235	1346	151	1	3180	422	6212	1358	314	350	6	3	6	6	4	2
bta-let-7i	5163	34356	14615	29553	2991	20100	38540	22524	51754	16792	9595	11277	50002	2658	48099	29978	6207	6829	53	34	63	29	376	22
bta-miR-23b-5p	0	0	0	0	0	0	0	0	72	0	0	0	0	0	0	0	0	0	0	0	0	0	0	0
bta-miR-23b-3p	1378	4191	1383	3044	270	2519	7575	3260	3211	2570	1827	829	4403	327	4386	1749	600	591	57	359	175	413	764	373
bta-miR-25	3786	15206	6259	13824	996	15664	27543	22636	15729	8438	6098	3520	18828	858	16363	8691	2029	2763	22	16	49	16	14	14
bta-miR-34c	763	5875	2778	2194	124	2739	1803	3380	2344	600	2894	233	5581	317	6717	960	437	220	7	4	2	2	6	3
bta-miR-363	0	0	0	0	0	0	0	0	0	3	0	0	0	0	0	0	0	0	0	0	0	0	0	0
bta-let-7a-3p	30	89	33	100	0	0	67	189	0	0	122	0	85	7	0	272	0	34	1	0	0	0	0	0
bta-let-7b	690429	1914198	754252	1527611	166838	1201890	5673996	3875336	3177884	1482386	889141	633005	1901269	124952	2398310	1172038	338672	428339	3106	3291	3445	4540	3685	3971
bta-let-7c	86682	279123	107971	194246	22534	140817	592970	510648	428036	191156	120737	77462	281390	17961	373038	155926	40569	53299	412	398	407	286	289	687
bta-let-7e	19237	35755	13313	26953	2855	18438	84505	66918	47809	28166	12170	10621	38626	2706	39118	21516	5286	5891	44	52	44	36	44	33
bta-miR-15a	0	108	31	168	19	62	70	160	0	172	0	0	196	16	132	242	30	16	0	0	0	0	0	0
bta-miR-195	4	243	79	171	21	174	420	54	60	22	21	134	187	28	32	57	142	28	0	0	0	0	1	0
bta-miR-19a	164	263	182	577	33	267	412	1	114	2	1	0	282	19	5	1	27	46	1	0	0	0	0	0
bta-miR-19b	1	2431	802	3518	154	2284	1504	1765	1115	634	818	485	2283	152	1958	765	101	243	1	0	4	1	6	1
bta-miR-204	2200	7291	2622	4688	380	4083	3865	4006	2197	2312	1579	763	7281	605	7056	1819	648	690	5	5	5	5	6	2
bta-miR-331-3p	387	454	259	704	26	132	1256	1353	228	314	3	47	525	50	801	106	57	27	3	0	0	0	0	0
bta-miR-34a	61	379	153	369	0	156	329	408	599	2	0	0	338	17	334	133	29	0	0	13	1	0	0	0
bta-miR-365-5p	0	0	0	0	0	0	0	0	0	0	0	0	0	0	1	4	5	10	2	0	0	0	0	0
bta-miR-365-3p	0	96	22	0	5	197	209	0	84	0	1	0	138	7	136	0	0	1	0	0	0	0	0	0
bta-miR-374a	1	1184	340	1513	92	2099	434	1123	2512	1218	0	554	1491	112	1507	546	202	203	0	0	2	4	2	1
bta-miR-497	0	0	0	154	0	0	0	0	0	1	0	0	0	5	44	0	41	0	0	0	0	0	0	0
bta-miR-660	595	3164	1077	1255	119	1433	3573	4824	2101	2139	17	167	2230	198	2229	833	217	216	1	4	2	2	3	3
bta-miR-99b	8953	21745	8329	14849	1361	15515	45795	45089	14499	11632	7082	4742	20469	1252	24195	9962	2925	3322	29	27	33	17	18	17
bta-miR-1	219	268	267	1845	255	12033	155	154	402	1145	319	1622	237	20	575	2610	571	530	7	103	156	2029	1825	1156
bta-miR-100	16541	21840	9397	7480	885	9321	14928	22882	11444	9403	6462	2507	30713	1841	36324	4817	2607	3585	29	23	23	215	24	13
bta-miR-105b	0	0	0	0	0	0	0	0	0	0	0	0	0	0	0	34	0	0	0	0	0	0	0	0
bta-miR-105a	136	0	0	0	0	0	0	0	0	0	0	0	10	0	0	34	0	0	4	3	8	0	0	0
bta-miR-106b	0	42	0	297	2	0	0	551	0	1	0	0	48	3	98	1	29	74	0	0	0	0	0	0
bta-miR-124b	0	0	0	0	0	1	74	0	0	0	0	0	0	0	0	0	0	0	0	0	0	0	0	0
bta-miR-129	165	31	0	37	0	0	0	0	14	0	0	0	73	0	0	0	0	0	0	0	0	0	0	0
bta-miR-129-5p	165	31	0	37	0	0	0	0	14	0	0	0	73	0	0	0	0	0	0	0	0	0	0	0
bta-miR-129-3p	0	0	0	0	0	0	57	0	0	0	0	0	0	0	0	0	0	0	0	0	0	0	0	0
bta-miR-130a	0	0	0	186	10	52	0	594	0	0	0	62	172	0	79	0	0	0	0	16	1	0	0	0
bta-miR-130b	0	23	0	0	0	0	0	0	0	0	0	0	52	10	0	0	0	0	0	0	9	0	0	0
bta-miR-133a	0	0	0	0	0	0	0	0	0	0	0	0	0	0	0	0	0	0	0	0	0	0	112	0
bta-miR-134	0	1	0	0	0	0	0	0	0	0	0	0	0	0	0	0	0	0	0	0	0	0	0	0
bta-miR-135a	1196	9019	2549	23775	1881	27008	7579	5254	20274	7412	3006	4304	23169	1021	17126	16267	5173	2949	28	25	19	15	13	7
bta-miR-135b	3	6	2	27	2	16	9	2	12	3	1	1	16	1	5	9	3	1	0	0	0	0	0	1
bta-miR-136	0	0	0	0	0	0	0	0	0	0	0	0	0	0	0	0	0	0	0	14	0	0	0	0
bta-miR-137	0	58	13	0	0	155	0	0	0	0	0	0	0	0	0	0	0	0	0	0	0	0	0	0
bta-miR-141	3245	38221	10146	95249	7841	78412	49619	37259	65983	30171	21816	14523	63005	2749	40038	70409	22188	15228	65	78	75	53	58	34
bta-miR-143	0	0	0	0	0	0	0	0	0	0	0	0	39	0	0	0	0	0	0	0	1	0	0	18
bta-miR-146b	68	834	289	273	40	461	347	661	254	2	208	0	558	93	839	1	3	81	0	11	0	0	0	0
bta-miR-146a	1873	6966	2313	4413	195	4144	1827	1386	1960	501	533	297	7497	564	8332	1074	368	349	7	15	7	8	4	1
bta-miR-147	0	0	0	0	0	0	0	0	0	0	0	0	0	0	116	0	0	0	0	0	0	0	0	0
bta-miR-152	2749	6586	2432	4525	381	3863	7484	10202	6030	3328	2937	579	4618	464	7002	1823	513	310	5	5	13	5	5	3
bta-miR-153	0	32	0	1	0	1	0	0	0	0	0	1	93	8	219	0	22	34	0	0	0	0	0	0
bta-miR-155	130	527	252	333	22	82	2011	560	506	176	215	68	1118	22	790	26	40	146	0	0	2	0	0	1
bta-miR-16a	8500	75402	27693	66271	6974	58522	104774	69296	73318	37693	31618	16954	88165	4937	98707	49192	13088	12886	85	136	141	283	408	218
bta-miR-181d	0	50	0	0	0	0	0	0	0	0	0	0	39	1	150	0	0	0	0	0	0	0	0	0
bta-miR-182	8790	38596	16194	24514	2512	21806	77552	30287	36683	23140	14889	10695	44642	2420	45331	21190	5745	6930	40	48	36	204	28	25
bta-miR-183	9449	30368	14269	19114	2045	13979	60022	33399	31974	18736	13111	9756	37683	1773	40611	24112	4356	6066	40	44	60	142	25	180
bta-miR-184	558	222	151	309	407	2941	504	1	112	402	161	448	329	7	595	537	49	159	0	18	27	0	430	73
bta-miR-185	725	1530	358	785	61	614	3227	3598	1414	382	316	272	998	96	1436	216	207	76	3	1	2	0	2	0
bta-miR-187	0	50	29	64	0	58	157	72	105	0	0	0	0	5	0	0	0	0	1	0	0	0	0	0
bta-miR-188	0	56	0	0	0	0	0	0	0	0	0	0	0	0	0	0	0	0	0	0	0	0	0	0
bta-miR-190a	361	437	71	296	28	254	347	239	688	299	0	0	179	28	240	118	0	1	0	0	0	1	2	0
bta-miR-190b	0	85	10	68	0	0	0	0	0	0	0	0	0	0	1	0	0	0	0	0	0	0	0	0
bta-miR-193b	0	0	0	0	0	0	0	0	0	0	0	0	0	0	0	0	0	4	0	0	0	0	0	0
bta-miR-194	337	930	311	1073	72	735	1108	454	734	652	563	296	788	95	1013	267	25	100	0	1	2	0	1	0
bta-miR-196a	106	1579	479	663	109	704	3033	1608	2920	2070	714	535	1727	92	2798	1284	327	441	2	22	2	134	1	0
bta-miR-196b	383	4324	1180	3066	394	1668	4744	3008	5034	3484	1216	889	4594	296	5636	4076	600	563	5	8	5	10	3	5
bta-miR-197	285	718	150	856	49	613	1392	820	604	1	1	5	964	62	1404	339	170	162	4	4	2	0	4	0
bta-miR-202	0	52	0	61	0	53	0	0	0	0	0	0	0	1	0	1	0	0	0	0	0	1	0	0
bta-miR-206	0	83	1	2	0	3	0	0	90	0	304	88	0	5	131	134	0	0	1	0	0	416	0	0
bta-miR-208a	0	0	0	0	0	0	0	0	0	0	0	0	0	0	1	0	0	0	0	0	0	0	0	0
bta-miR-211	8	105	35	30	4	72	16	20	8	10	7	0	35	2	15	7	9	2	0	0	0	0	0	0
bta-miR-212	0	0	60	0	0	0	0	0	0	0	0	0	0	0	1	0	0	0	0	0	0	0	0	1
bta-miR-216b	0	70	0	0	0	0	0	0	0	0	0	0	0	5	0	0	0	0	0	0	0	0	0	0
bta-miR-217	0	0	0	9	13	53	0	0	0	0	0	0	81	0	116	0	0	0	0	0	0	0	0	0
bta-miR-223	0	48	46	1	0	94	0	181	65	303	0	0	32	1	0	307	0	35	0	0	0	182	9	0
bta-miR-224	273	3091	819	3295	255	3170	5246	4044	2322	3344	1241	489	3128	228	2676	2705	505	518	7	6	0	3	2	3
bta-miR-28	102	243	0	68	0	0	184	87	0	0	0	0	232	14	90	0	0	44	0	1	2	0	0	0
bta-miR-296-5p	8	0	0	0	0	0	0	0	0	111	0	0	0	0	0	0	0	0	0	0	0	0	0	0
bta-miR-296-3p	235	138	23	0	0	2	198	824	74	174	0	0	142	14	6	0	0	0	2	0	0	0	1	1
bta-miR-29d-5p	1292	3604	1171	3704	254	1631	3031	2610	5085	1396	608	129	2779	273	3839	706	456	332	1	0	5	1	3	2
bta-miR-29d-3p	140	317	49	60	16	170	363	398	72	167	26	97	128	23	244	171	7	0	1	1	0	0	0	0
bta-miR-301a	0	69	0	77	0	87	0	0	0	0	0	0	37	3	178	0	0	0	0	0	0	0	0	0
bta-miR-302c	0	0	0	1	0	0	0	0	0	0	0	0	0	0	0	0	0	0	0	0	0	0	0	0
bta-miR-30f	2380	5042	1671	4346	315	3370	7021	5086	3542	2884	457	450	4355	456	6108	1272	706	304	4	12	4	6	4	2
bta-miR-32	0	155	65	431	89	623	65	0	671	0	0	0	422	24	531	799	148	16	0	0	11	0	0	0
bta-miR-323	115	0	0	0	0	0	0	0	0	0	0	0	0	0	0	0	0	19	0	0	0	0	0	0
bta-miR-324	33	418	165	58	0	61	222	47	551	0	0	0	268	60	612	0	0	52	1	1	2	0	0	0
bta-miR-326	0	1	0	0	0	1	0	115	0	0	0	0	36	0	0	0	0	0	0	0	0	2	1	0
bta-miR-328	366	600	492	647	68	1222	2570	2405	629	956	197	185	997	51	720	512	210	83	3	2	2	0	2	1
bta-miR-335	607	1287	659	811	114	1125	507	658	2	164	0	1	1176	114	1575	598	61	72	2	2	0	0	0	0
bta-miR-338	140	161	107	21	0	66	0	123	0	181	0	0	38	0	0	166	0	1	1	0	0	0	0	0
bta-miR-339a	26338	33512	12128	21977	1271	16137	37737	66066	14980	13205	6528	1924	19449	2565	36076	5661	2134	1898	30	50	49	27	24	18
bta-miR-33a	119	96	65	0	16	108	0	147	0	0	0	0	75	23	0	141	0	0	0	0	0	0	0	0
bta-miR-33b	0	31	0	7	0	0	0	0	0	0	0	0	0	0	0	0	0	0	0	0	0	0	0	0
bta-miR-340	0	0	26	0	1	67	1	115	0	185	57	0	38	0	0	1	0	0	0	0	0	0	0	0
bta-miR-346	0	1	0	0	0	0	51	0	0	0	0	0	1	0	0	0	0	0	0	1	3	0	4	0
bta-miR-362-5p	838	284	306	1	9	226	276	1079	316	374	218	0	522	48	727	1	0	82	0	0	2	0	1	0
bta-miR-362-3p	0	46	0	0	0	0	0	0	0	0	0	0	0	0	0	0	0	0	0	0	0	0	0	0
bta-miR-370	0	0	0	0	0	0	0	0	0	0	0	0	0	0	0	3	0	0	0	0	0	0	0	1
bta-miR-374b	218	296	129	386	35	336	128	225	567	2	0	1	794	51	571	515	35	43	1	0	1	0	1	0
bta-miR-375	72	919	181	61	1	204	605	480	1198	206	1	333	1400	55	1093	286	185	112	0	2	0	1	1	0
bta-miR-377	0	0	0	0	0	0	0	0	0	0	0	0	1	0	0	0	0	0	0	0	0	0	0	0
bta-miR-378	131	200	113	1	29	114	188	320	437	2	0	0	171	6	203	0	28	37	1	0	0	0	0	0
bta-miR-379	0	0	0	0	0	0	81	0	0	0	0	0	0	0	0	0	0	0	0	0	0	0	0	0
bta-miR-382	0	0	0	0	0	0	0	0	0	0	0	0	42	0	0	1	0	0	0	0	0	103	0	0
bta-miR-383	0	0	0	0	0	0	0	0	0	0	148	0	0	2	0	0	0	0	0	0	0	0	0	0
bta-miR-409a	0	0	0	0	0	0	0	1	0	0	0	0	0	0	0	1	0	0	0	0	0	1	0	1
bta-miR-411a	0	10	0	0	13	0	3	0	35	0	0	65	90	0	0	0	0	0	0	0	0	0	0	0
bta-miR-421	271	496	375	957	11	240	887	250	908	435	161	0	642	62	1167	153	52	70	0	0	1	1	0	1
bta-miR-429	2314	24636	8090	47455	3916	42785	30945	10671	34142	16811	10790	6989	41516	1813	37486	28694	9652	7511	33	46	69	283	35	195
bta-miR-431	0	0	0	0	0	0	0	0	0	4	0	0	0	0	0	0	0	0	0	0	0	0	0	0
bta-miR-432	0	0	0	0	0	0	46	0	0	0	0	0	0	0	1	0	0	0	0	0	0	0	0	0
bta-miR-433	0	0	0	0	0	0	0	0	1	0	0	0	0	0	0	0	0	0	0	0	0	0	0	0
bta-miR-448	0	0	0	0	0	0	0	0	0	0	0	0	0	0	3	0	0	0	0	0	0	0	0	0
bta-miR-449a	334	5687	2058	3549	296	2594	2301	1648	3027	347	273	470	7714	412	7345	1944	605	260	3	4	5	1	4	1
bta-miR-449b	0	53	4	4	0	2	1	5	10	0	0	1	22	0	15	3	2	0	0	0	0	0	0	0
bta-miR-451	0	42	0	0	0	0	0	0	0	0	0	0	0	0	0	0	38	0	0	0	0	0	0	0
bta-miR-452	4236	6734	2081	3953	224	4045	5130	12621	6113	3933	2125	1088	4810	346	5313	1374	390	736	5	6	7	7	7	0
bta-miR-454	0	1	28	0	0	52	73	156	131	0	0	0	130	0	0	219	0	0	0	0	0	1	0	0
bta-miR-483	1	37	0	0	0	2	55	0	0	0	0	1	0	0	337	0	0	0	0	0	20	0	0	0
bta-miR-486	0	1	0	0	0	0	66	0	0	0	0	0	0	0	0	0	0	0	0	0	0	0	0	0
bta-miR-491	604	232	8	1	1	40	320	447	431	0	175	0	104	10	159	296	1	7	0	0	0	0	0	1
bta-miR-494	0	0	0	0	0	0	0	0	0	0	0	0	0	0	0	0	0	0	0	0	0	1	0	0
bta-miR-495	0	0	0	0	0	0	0	0	0	0	0	0	32	0	0	0	0	0	0	0	0	0	0	0
bta-miR-500	0	125	71	0	0	120	316	378	115	0	0	0	130	10	68	1	0	0	1	0	0	0	0	0
bta-miR-502a	608	270	299	203	8	123	824	1280	86	179	237	0	225	19	288	178	0	0	1	0	0	0	1	0
bta-miR-502b	0	1	0	0	0	0	0	0	0	0	0	0	0	0	0	0	0	0	0	0	0	0	0	0
bta-miR-504	798	788	335	490	38	331	1388	1695	750	748	0	76	782	39	1571	251	11	166	4	1	0	1	1	2
bta-miR-505	0	0	0	0	0	20	0	0	0	0	0	0	34	0	0	0	0	0	0	0	0	0	0	0
bta-miR-543	0	0	0	0	0	0	1	0	6	0	0	0	0	0	0	0	0	0	0	0	0	0	0	0
bta-miR-551b	0	0	0	51	0	0	0	0	0	0	0	0	0	0	0	0	0	0	0	0	0	0	0	0
bta-miR-582	0	45	0	0	0	0	0	0	0	0	0	0	0	0	0	0	0	0	0	0	0	0	94	0
bta-miR-584	0	0	0	0	0	0	0	0	0	0	1	0	0	0	0	0	0	0	0	0	0	0	0	0
bta-miR-599	0	0	0	0	0	0	0	0	0	0	0	0	0	1	0	0	0	0	0	0	0	0	0	0
bta-miR-628	0	67	47	51	0	105	0	1	0	0	168	0	151	2	283	0	0	0	0	0	1	0	0	0
bta-miR-631	0	0	0	0	0	0	0	0	0	0	0	0	0	0	0	0	0	0	0	0	0	0	1	0
bta-miR-658	0	1	0	0	0	2	0	0	0	0	0	1	0	0	0	1	1	0	0	0	0	0	2	0
bta-miR-665	0	0	0	0	0	0	0	0	0	0	0	0	1	0	0	0	0	0	0	1	0	0	0	0
bta-miR-671	153	0	18	0	0	1	40	269	2	0	0	0	0	2	1	0	0	0	0	0	1	0	0	0
bta-miR-744	357	1155	243	429	90	518	2166	1602	1346	100	184	170	832	60	806	169	61	193	2	1	0	0	1	3
bta-miR-760-5p	0	0	0	0	0	0	0	0	0	0	91	0	0	0	0	0	1	0	0	0	0	1	1	1
bta-miR-760-3p	0	100	66	0	0	0	173	1	86	0	0	0	79	8	333	0	0	57	0	0	1	0	2	0
bta-miR-763	0	0	0	0	0	0	0	0	0	0	0	0	0	0	0	0	0	0	0	0	0	117	0	0
bta-miR-767	0	0	22	0	8	0	0	0	0	0	0	0	0	0	0	0	0	0	0	0	26	0	0	0
bta-miR-769	294	258	98	195	12	251	314	435	197	143	126	0	52	4	175	0	37	35	4	57	45	140	132	0
bta-miR-874	62	171	78	0	0	58	173	174	8	174	1	0	39	15	123	0	28	1	0	0	0	0	0	0
bta-miR-875	0	0	0	1	0	0	0	0	0	3	0	0	0	0	0	0	0	0	0	0	0	0	0	0
bta-miR-877	74	51	54	0	5	36	91	108	1	0	0	0	28	2	0	0	0	14	0	0	0	0	0	0
bta-miR-885	0	0	0	1	0	3	0	0	1	0	0	0	0	0	0	0	0	0	0	1	8	0	0	0
bta-miR-92b	106	0	54	73	57	98	677	1	376	3	0	431	440	3	393	476	132	153	1	2	1	0	0	0
bta-miR-935	1	4	0	3	0	10	2	2	1	1	1	4	1	3	3	13	0	1	0	0	0	0	6	1
bta-miR-940	0	0	0	0	0	0	0	0	0	1	0	0	0	0	0	0	0	0	0	0	13	0	0	0
bta-miR-95	2	1335	367	2959	138	1859	1251	770	1416	710	722	621	1705	72	1884	787	405	254	1	2	3	0	0	2
bta-miR-96	155	454	265	559	42	1424	333	784	1840	1	181	0	933	58	1152	459	284	229	2	2	2	3	0	0
bta-miR-9-5p	2	920	230	1788	163	2575	800	831	1377	1215	503	433	1040	29	619	846	498	184	1	2	15	0	3	1
bta-miR-1224	0	0	15	1	0	0	0	0	0	0	1	0	0	0	1	0	0	0	0	0	0	0	1	0
bta-miR-1225-3p	0	0	0	0	0	0	0	0	0	0	1	0	0	0	1	1	0	0	0	0	0	0	0	0
bta-miR-29e	136	189	67	165	1	55	4	710	137	88	0	3	33	2	14	4	54	26	1	0	0	1	1	0
bta-miR-1284	1	0	21	38	0	63	0	0	0	0	0	0	0	0	132	0	0	0	0	0	3	0	0	0
bta-miR-1291	9	0	0	1	0	1	0	0	0	2	0	0	0	0	1	0	0	0	0	0	0	5	3	12
bta-miR-1835	0	0	0	0	0	0	0	4	0	0	0	0	1	0	0	0	0	0	0	0	0	0	0	0
bta-miR-1281	0	1	0	31	0	0	1	0	0	0	0	0	0	0	1	0	0	0	0	0	0	0	0	0
bta-miR-1251	315	178	37	97	13	391	395	425	350	2	0	121	134	47	316	54	0	23	0	0	0	0	0	0
bta-miR-1296	42	407	137	480	0	288	361	365	328	152	177	0	445	33	387	328	1	26	0	4	0	0	0	1
bta-miR-1839	1498	2763	965	1062	86	553	2804	3063	1608	1513	154	16	2456	145	2675	385	193	226	3	2	3	1	1	1
bta-miR-1307	0	348	54	284	10	353	325	726	375	299	93	0	263	15	362	1	0	66	0	0	0	0	0	115
bta-miR-1298	4347	6462	2941	3110	409	4936	8341	15142	8419	3687	2880	965	6682	393	8078	3794	1179	1371	8	13	10	5	5	0
bta-miR-1287	0	0	0	0	0	0	1	0	0	122	0	0	0	0	0	0	0	0	0	0	0	0	0	0
bta-miR-1306	356	770	233	542	57	536	1781	1641	392	160	377	363	896	45	776	638	94	100	0	0	3	0	1	3
bta-miR-1271	0	0	0	0	0	0	0	1	0	0	0	0	38	0	0	0	15	0	0	0	0	0	0	0
bta-miR-1249	193	18	0	4	0	42	30	190	1	0	0	0	87	3	135	177	0	0	0	2	0	1	0	1
bta-miR-2284i	0	4	0	2	0	0	6	9	2	0	0	3	0	0	5	0	0	0	0	0	0	0	0	0
bta-miR-2289	0	0	0	0	0	0	0	0	0	0	0	0	0	0	0	0	19	0	0	0	0	0	0	0
bta-miR-2291	1	0	0	0	0	0	0	0	0	0	0	0	0	0	0	0	0	0	0	0	0	0	0	0
bta-miR-2292	0	0	0	0	0	0	0	0	0	0	0	0	0	0	0	0	0	0	0	0	0	0	0	1
bta-miR-2293	0	0	0	0	0	0	0	0	0	0	0	0	0	0	0	0	0	17	0	0	0	0	0	0
bta-miR-2295	38	0	16	0	0	0	0	0	0	0	0	0	0	0	0	0	0	0	0	0	0	0	0	0
bta-miR-2296	0	0	0	0	0	0	0	0	0	0	0	0	0	0	0	0	0	0	1	0	0	0	0	0
bta-miR-2297	0	0	0	0	0	0	0	0	0	0	1	0	0	0	0	0	0	0	0	0	0	0	0	0
bta-miR-2299-5p	0	0	0	0	0	0	0	0	0	0	0	0	2	0	0	0	0	0	0	0	0	0	0	0
bta-miR-2300a-5p	0	0	0	0	0	32	0	0	0	0	0	0	0	0	0	0	0	0	0	0	0	0	0	0
bta-miR-2300b-3p	0	0	0	0	0	32	0	0	0	0	0	0	0	0	0	0	0	0	0	0	0	0	0	0
bta-miR-2284s	1	0	0	0	0	0	0	0	0	0	0	0	0	0	1	0	0	0	0	0	0	0	0	0
bta-miR-2302	0	0	0	0	0	0	0	0	0	0	0	0	0	0	0	0	0	0	0	0	0	0	0	69
bta-miR-2304	55	0	0	39	2	0	0	0	125	58	0	71	21	0	14	0	0	16	2	0	2	0	0	0
bta-miR-2305	2	1	0	6	0	1	0	4	4	0	1	0	3	1	71	3	1	0	1	3	4	0	2	0
bta-miR-2306	0	0	0	1	0	0	0	0	0	0	0	0	0	0	0	0	0	0	0	0	0	0	0	0
bta-miR-2309	0	0	0	0	0	1	0	0	0	0	0	0	0	0	0	37	0	0	0	0	0	0	0	0
bta-miR-2310	0	0	0	0	0	0	0	0	0	0	0	0	18	0	0	0	0	0	0	0	0	0	0	0
bta-miR-2284l	0	0	0	0	0	0	0	0	0	0	0	0	0	0	1	0	0	0	0	0	0	0	0	0
bta-miR-2489	0	0	0	0	0	0	0	0	0	0	0	0	0	0	0	1	0	0	0	0	1	0	0	0
bta-miR-2311	0	0	21	0	0	0	0	0	0	0	0	0	0	0	0	0	0	0	0	0	0	0	0	0
bta-miR-2284j	1	62	0	0	0	1	0	3	1	0	1	0	15	2	0	0	0	0	0	0	0	0	0	0
bta-miR-2312	1	62	0	0	0	1	0	3	1	0	1	0	15	2	0	0	0	0	0	0	0	0	0	0
bta-miR-2313-3p	0	0	0	0	0	0	0	0	0	0	0	0	0	0	0	0	0	0	0	0	0	0	0	1
bta-miR-2284t-5p	0	0	0	1	0	0	0	1	0	0	0	0	1	0	1	0	0	0	0	0	0	0	0	0
bta-miR-2284t-3p	0	0	0	0	0	1	0	1	1	0	0	0	0	0	0	0	0	0	0	0	0	0	0	0
bta-miR-2285b	7	90	35	31	0	2	97	12	0	1	203	0	43	10	92	2	0	14	0	0	0	1	1	0
bta-miR-2314	0	0	0	0	0	24	0	0	0	0	0	0	0	0	0	0	0	0	0	0	0	0	0	0
bta-miR-2315	0	0	0	0	0	1	0	6	0	0	0	0	0	0	0	0	0	0	0	0	0	0	0	0
bta-miR-2284d	3881	4125	1707	1448	148	3101	5514	11122	3969	2044	857	1119	2788	190	4466	295	465	327	7	4	7	8	1	6
bta-miR-2316	77	0	0	0	0	0	0	0	65	1	0	0	0	0	0	0	0	0	0	0	0	0	0	0
bta-miR-1343-5p	213	108	38	58	12	109	538	0	1	112	397	110	129	16	0	0	0	30	1	1	0	0	0	0
bta-miR-2318	0	0	0	0	0	1	0	0	0	0	0	0	0	0	0	84	0	0	0	0	0	0	0	0
bta-miR-2320-3p	0	0	0	0	0	0	0	0	0	0	0	0	0	2	0	0	0	0	0	0	0	0	0	0
bta-miR-2284n	8351	9998	2431	3235	475	5338	3239	8139	9587	2294	1055	882	12091	654	13341	3058	610	624	6	9	11	6	2	3
bta-miR-2284g	0	0	0	0	1	0	0	2	0	0	0	0	2	0	0	0	0	0	0	0	0	0	0	0
bta-miR-2322-3p	0	0	0	0	0	0	0	0	0	0	0	0	0	0	0	0	0	0	0	0	0	1	0	0
bta-miR-2324	0	0	0	0	0	0	0	0	0	0	0	0	16	0	0	0	0	0	0	0	0	124	0	0
bta-miR-2325a	0	1	1	0	0	0	0	0	0	0	0	0	18	0	0	0	0	0	0	0	6	0	0	0
bta-miR-2326	0	0	0	0	0	0	0	0	0	0	0	0	0	0	1	0	0	0	0	0	0	0	0	0
bta-miR-2327	0	0	0	0	0	0	0	0	0	0	0	0	0	0	0	0	0	0	0	0	0	0	0	1
bta-miR-2328-5p	1	0	0	0	0	0	0	0	0	0	2	0	0	0	0	0	0	0	0	1	0	0	2	0
bta-miR-2328-3p	50	3	1	0	0	0	0	0	0	0	0	0	5	0	0	0	0	0	0	0	0	0	1	0
bta-miR-2331-3p	0	0	0	0	0	0	0	0	1	0	0	0	0	0	0	0	0	0	0	0	0	0	0	0
bta-miR-2336	0	39	0	0	12	50	100	0	0	177	0	0	96	6	0	158	56	0	1	0	0	0	0	0
bta-miR-2337	0	0	0	0	0	0	0	0	0	0	0	0	0	0	0	0	0	0	0	11	0	0	0	0
bta-miR-2338	0	0	0	0	0	0	0	0	0	0	0	0	0	0	0	2	0	0	0	0	0	0	0	0
bta-miR-2339	0	0	0	46	0	0	0	0	0	0	0	0	0	0	2	0	0	0	0	0	0	0	0	0
bta-miR-1814a	0	0	0	0	0	0	0	0	0	0	0	0	0	0	0	0	0	0	0	0	1	0	1	0
bta-miR-2340	223	25	72	0	0	1	47	146	73	0	0	0	30	16	513	1	20	22	3	59	143	1	176	0
bta-miR-2341	0	0	0	0	0	0	0	0	0	0	1	0	0	0	0	0	0	0	0	0	0	1	0	0
bta-miR-2342	0	0	0	0	0	0	0	0	0	0	1	0	1	0	0	0	0	0	0	13	0	0	0	0
bta-miR-2343	0	0	0	0	0	0	0	0	0	0	1	0	0	0	0	0	0	0	0	0	0	0	0	0
bta-miR-2344	0	0	0	0	0	0	0	0	0	0	0	0	0	0	0	1	1	0	0	0	0	0	0	0
bta-miR-2346	227	203	0	0	0	54	167	0	211	0	191	0	121	1	0	75	0	1	0	0	0	1	0	0
bta-miR-2347	0	0	0	0	0	0	0	0	0	1	0	1	0	0	0	0	0	0	0	0	0	0	0	0
bta-miR-2348	0	0	0	0	0	81	0	0	0	2	0	0	33	7	0	0	0	0	0	0	0	0	106	0
bta-miR-2349	0	0	0	0	0	0	0	0	0	0	0	0	0	1	0	0	0	0	0	0	0	0	0	0
bta-miR-2284p	0	0	0	0	0	0	0	0	0	0	0	0	0	0	0	0	9	0	0	0	0	0	0	0
bta-miR-2350	0	17	0	0	0	38	0	0	0	0	0	1	0	0	0	0	0	0	0	0	0	0	0	0
bta-miR-2354	0	0	1	0	0	0	1	172	78	0	0	0	36	0	0	0	0	0	0	1	0	0	0	0
bta-miR-2284u	0	0	0	0	7	39	0	1	0	0	0	0	1	0	0	0	0	0	0	0	0	0	0	0
bta-miR-2358	0	38	18	116	0	123	0	0	0	192	1	168	21	3	0	98	16	10	0	4	13	157	32	37
bta-miR-2360	1	0	0	41	0	0	0	0	0	0	2	0	0	0	0	4	1	0	0	0	0	0	0	4
bta-miR-2361	55	0	0	13	0	0	0	0	0	58	0	71	0	4	3	0	0	16	0	0	1	0	0	0
bta-miR-2362	0	0	0	0	0	1	0	0	0	0	0	0	0	0	0	0	0	0	0	0	0	0	0	0
bta-miR-2364	1	0	0	0	0	0	0	0	0	94	0	0	0	0	0	0	0	22	0	0	0	0	2	0
bta-miR-2366	0	0	0	0	0	0	0	0	0	0	1	0	0	0	0	0	0	0	0	0	0	0	0	0
bta-miR-2284f	0	0	0	0	0	0	0	0	0	0	0	0	1	0	0	0	0	0	0	0	0	0	0	0
bta-miR-2284a	0	0	0	0	0	0	0	1	0	0	0	0	0	1	0	0	0	0	0	0	0	0	0	0
bta-miR-2284k	2053	4014	1736	754	106	1738	1758	5082	1625	697	648	264	1991	153	2530	342	323	64	3	5	4	3	3	1
bta-miR-2369	0	0	0	0	0	0	0	0	0	0	0	0	0	0	0	0	0	0	0	0	0	0	1	0
bta-miR-2372	0	1	0	0	0	0	0	1	0	0	0	0	0	0	0	0	0	0	0	0	0	0	0	0
bta-miR-2373-5p	0	0	0	0	0	0	0	0	1	0	0	0	0	0	0	82	22	0	0	0	0	2	0	0
bta-miR-2373-3p	0	0	0	0	0	1	0	0	0	0	0	0	0	0	0	0	0	0	0	0	0	0	0	0
bta-miR-2374	0	26	0	1	0	0	0	2	0	0	1	2	0	0	3	0	0	1	0	0	0	0	1	0
bta-miR-2375	0	0	0	0	0	0	0	0	0	0	0	0	0	0	0	0	0	0	0	0	1	0	0	0
bta-miR-2378	0	0	1	1	0	1	0	0	0	0	0	0	0	0	0	0	0	0	0	1	3	0	0	0
bta-miR-2284c	0	0	21	1	7	0	0	0	0	0	0	0	2	0	64	0	0	9	0	0	0	0	0	0
bta-miR-2381	0	0	0	0	1	0	0	0	0	0	0	0	0	0	91	0	0	0	0	0	0	0	0	0
bta-miR-2382-5p	0	0	0	0	0	0	0	0	0	1	0	0	38	0	0	0	0	0	0	0	0	0	0	0
bta-miR-2382-3p	0	0	0	0	0	46	0	0	0	0	0	0	1	0	69	0	0	0	0	13	0	0	0	0
bta-miR-2384	32	0	0	0	0	0	0	0	0	0	0	0	0	0	0	0	0	0	0	0	0	0	0	0
bta-miR-2325c	30	75	17	37	0	0	0	21	0	0	18	2	17	1	34	7	0	1	1	51	30	1	31	0
bta-miR-2284v	0	0	21	0	0	0	0	0	0	0	0	0	2	0	64	0	0	9	0	0	0	0	0	0
bta-miR-2387	0	0	25	0	0	0	114	0	0	0	0	1	0	0	1	0	0	0	0	0	0	0	0	0
bta-miR-2388-5p	0	0	0	0	0	0	0	0	0	0	0	0	1	0	0	0	0	0	0	0	0	0	0	0
bta-miR-2388-3p	95	46	38	164	33	205	71	209	79	375	204	290	79	1	103	251	38	75	1	11	30	81	178	272
bta-miR-2392	0	0	0	2	0	0	2	0	1	2	0	0	1	0	0	0	0	0	0	0	0	0	0	0
bta-miR-2393	1	0	0	0	0	7	0	0	0	0	0	0	0	0	0	0	0	0	0	1	1	0	0	0
bta-miR-2396	0	56	0	0	0	0	0	0	0	0	0	0	31	0	0	0	0	0	0	0	0	0	0	0
bta-miR-2285c	0	28	2	0	0	1	0	0	95	0	3	0	39	0	8	0	1	0	0	0	0	0	0	0
bta-miR-2397-5p	0	0	0	0	0	0	0	0	0	0	1	0	0	0	0	0	0	0	0	0	0	0	0	0
bta-miR-2397-3p	0	1	1	0	0	1	0	0	0	0	0	0	0	0	0	0	0	0	0	0	2	0	1	0
bta-miR-2398	0	0	0	0	0	1	0	0	0	0	0	0	0	0	0	0	0	0	0	0	0	0	0	0
bta-miR-2400	0	0	0	0	0	0	0	0	0	0	0	0	0	0	0	2	0	0	0	0	0	0	0	0
bta-miR-2284q	0	0	0	0	0	0	0	0	0	0	0	0	1	0	0	0	0	0	0	0	0	0	0	0
bta-miR-2401	0	0	0	0	0	20	0	0	0	0	0	0	0	0	0	0	0	0	0	0	0	0	0	0
bta-miR-2407	0	0	0	26	1	1	0	1	0	0	0	0	1	0	0	0	0	0	0	14	0	0	0	94
bta-miR-2409	0	0	0	0	0	0	71	0	0	0	0	0	0	0	0	0	0	0	1	0	0	0	52	0
bta-miR-2410	0	1	0	0	0	0	0	0	1	0	0	131	0	0	97	0	0	0	0	0	3	1	0	0
bta-miR-1584-5p	3	0	0	0	0	0	0	0	0	3	9	0	40	5	0	0	0	0	1	0	0	0	0	0
bta-miR-2411-5p	0	38	0	80	0	0	155	0	0	0	0	0	70	10	1	0	0	0	0	0	0	0	0	0
bta-miR-2411-3p	0	42	0	0	15	0	0	0	91	0	0	0	0	0	126	0	0	0	0	0	0	0	0	0
bta-miR-2412	1	0	0	0	0	1	0	0	1	1	0	0	0	0	0	0	0	8	0	0	1	0	0	0
bta-miR-2413	0	0	0	1	0	0	0	0	0	0	1	0	0	0	0	1	0	0	0	0	0	0	0	0
bta-miR-2284m	10	27	7	5	0	17	9	19	38	21	3	3	37	1	20	8	11	0	0	0	0	0	0	0
bta-miR-2416	0	0	0	0	0	0	0	0	0	0	0	0	0	0	0	0	0	0	0	0	0	0	0	1
bta-miR-2417	0	0	0	3	0	0	0	0	0	0	0	0	0	0	0	0	0	0	0	0	0	0	0	0
bta-miR-2284b	0	0	0	0	1	0	0	1	0	1	0	0	1	0	0	0	0	0	1	0	0	0	0	0
bta-miR-1814c	0	0	0	0	0	0	0	0	0	0	0	0	18	0	0	0	0	0	0	0	0	0	0	0
bta-miR-2419-5p	1	433	348	609	48	501	935	741	484	536	194	157	887	36	934	502	77	139	2	2	1	2	1	0
bta-miR-2421	0	1	0	0	0	0	0	0	0	0	0	0	0	0	0	0	0	0	0	0	0	0	0	0
bta-miR-2422	0	0	0	0	0	0	0	3	0	1	1	0	0	0	1	0	0	0	0	0	0	0	1	1
bta-miR-320b	0	0	1	0	0	0	0	0	1	0	0	0	1	0	0	0	0	0	0	2	2	0	0	1
bta-miR-2423	0	0	0	0	0	0	0	0	0	0	0	0	0	0	0	0	0	0	0	20	0	0	0	0
bta-miR-2424	0	23	0	1	0	0	0	0	0	0	0	0	0	0	0	0	0	0	0	0	0	0	0	0
bta-miR-2425-5p	0	0	0	0	0	0	0	208	0	0	0	0	1	0	0	0	0	0	0	0	0	0	0	1
bta-miR-2426	0	0	0	0	0	0	0	0	0	0	0	0	0	0	0	0	23	0	0	0	0	0	0	0
bta-miR-2428	0	0	0	0	0	0	0	0	1	1	300	0	0	7	0	0	1	35	0	0	0	0	0	63
bta-miR-2429	0	0	1	0	0	0	0	0	0	0	0	0	0	0	0	0	0	0	0	0	0	0	0	0
bta-miR-2431-5p	0	0	0	61	0	0	186	0	0	0	0	0	54	0	0	0	0	0	0	0	0	0	1	0
bta-miR-2431-3p	1	0	0	75	0	140	0	0	0	1	245	0	93	7	140	1	0	31	0	0	0	0	0	0
bta-miR-2433	0	0	0	0	0	0	0	0	0	0	0	0	0	0	0	1	0	0	0	0	0	0	0	0
bta-miR-2434	0	0	0	0	0	0	0	0	0	0	0	0	20	0	0	0	0	0	0	0	0	0	0	0
bta-miR-2435	0	0	1	0	0	0	0	0	1	0	0	0	53	0	0	0	0	0	0	0	0	0	0	0
bta-miR-2436-5p	0	1	0	1	0	1	2	5	1	4	1	2	1	4	0	76	2	0	0	0	1	0	1	7
bta-miR-2436-3p	0	1	31	0	0	2	1	1	1	1	2	0	0	0	0	3	31	0	0	0	0	0	65	0
bta-miR-2284r	186	28	26	0	0	0	0	0	0	0	0	0	64	0	0	0	0	0	0	1	0	1	0	0
bta-miR-2438	0	0	13	1	0	36	5	0	2	0	0	0	0	0	2	0	0	1	0	0	0	0	0	0
bta-miR-2440	0	0	0	0	0	0	54	0	0	0	0	0	0	0	0	0	0	0	0	0	0	0	0	0
bta-miR-2441	0	0	0	0	0	0	0	0	0	2	0	0	0	0	0	86	11	0	0	0	21	0	0	0
bta-miR-2442	0	1	0	1	2	3	0	0	0	0	1	1	0	0	4	0	1	0	0	0	0	1	1	1
bta-miR-2443	0	75	111	54	0	62	1143	1025	276	0	0	0	107	25	285	152	24	20	0	0	0	0	0	1
bta-miR-2284h-5p	1	40	4	2	0	85	2	7	6	5	2	0	15	4	15	2	3	0	0	0	0	1	0	0
bta-miR-2284h-3p	0	0	0	0	0	0	0	0	0	0	0	0	0	0	0	0	0	0	1	0	0	0	0	0
bta-miR-2447	5	4	5	37	0	0	1	0	0	0	0	0	25	4	0	0	0	0	2	10	13	2	0	0
bta-miR-2448-3p	0	0	21	0	10	0	171	96	149	1	1	0	104	22	130	136	0	0	0	0	0	0	0	1
bta-miR-2449	0	2	0	0	0	0	0	1	0	0	0	0	1	0	1	0	0	0	0	0	0	0	0	0
bta-miR-2450b	0	0	0	0	0	0	0	0	0	0	0	0	0	0	1	0	0	0	0	0	0	0	0	0
bta-miR-2450a	0	0	0	0	0	0	0	0	0	0	0	0	0	0	1	0	0	0	0	0	0	0	0	0
bta-miR-1777a	1	0	12	1	0	3	1	0	0	0	1	0	1	0	4	0	1	0	0	1	0	134	1	0
bta-miR-2452	0	20	0	0	0	0	0	0	0	0	0	0	0	0	0	0	0	0	0	0	0	0	0	0
bta-miR-2453	0	0	0	0	0	32	0	0	0	0	0	0	0	0	0	0	0	0	0	0	0	0	0	0
bta-miR-2454-5p	0	0	0	0	0	0	0	0	0	1	0	0	0	0	0	0	2	0	0	1	2	0	4	0
bta-miR-2455	0	0	0	37	58	34	0	0	0	0	0	0	0	1	0	0	0	0	0	0	1	0	0	0
bta-miR-339b	2982	3793	1430	2737	111	1956	4334	8956	1450	1372	618	2	2115	306	3782	10	106	148	5	4	6	0	2	3
bta-miR-2460	0	0	0	0	0	0	0	0	1	0	0	0	0	0	0	0	0	0	0	0	0	1	0	1
bta-miR-1777b	1	0	12	0	12	54	2	1	0	0	2	0	1	0	4	0	1	0	0	1	0	0	0	0
bta-miR-2464-5p	0	0	0	1	0	0	0	0	0	0	0	0	0	0	0	0	0	0	0	0	0	0	0	0
bta-miR-2466-5p	0	0	0	0	0	0	0	0	0	1	0	0	0	0	0	0	1	0	0	0	0	0	0	0
bta-miR-2467-5p	0	0	0	0	0	1	0	0	0	0	0	0	0	0	0	0	0	0	0	0	0	0	0	0
bta-miR-2467-3p	70	0	0	0	0	0	0	0	0	0	0	0	1	6	0	2	0	12	0	0	0	0	138	0
bta-miR-2468	0	0	0	0	0	0	0	0	0	0	0	0	0	0	0	0	0	0	0	0	1	0	0	0
bta-miR-2471-3p	0	0	0	0	0	0	0	0	0	0	0	1	1	0	0	0	0	0	0	0	0	0	0	0
bta-miR-2472	1	0	0	0	0	0	0	159	0	0	0	0	0	0	0	59	0	0	0	0	0	0	0	0
bta-miR-2284o	2	26	0	0	0	33	0	0	2	0	0	0	2	0	0	0	9	0	0	0	0	0	0	0
bta-miR-2478	4275	8700	4073	4822	457	4126	922	1114	704	19	324	27	16125	1233	16396	3288	1026	951	2673	31303	27843	5821	2226	2410
bta-miR-2481	0	0	0	0	0	36	0	0	0	0	0	0	36	0	0	0	0	0	0	0	0	0	0	0
bta-miR-2483-5p	0	138	64	0	0	0	57	0	0	1	0	1	109	7	8	127	40	0	0	0	0	0	0	0
bta-miR-2483-3p	305	229	91	75	0	1	0	0	130	195	0	0	312	9	626	25	0	0	0	1	1	0	0	0
bta-miR-2484	0	0	0	0	0	1	0	0	0	0	0	0	0	0	0	0	0	0	0	0	0	0	0	0
bta-miR-664a	0	0	0	0	0	0	0	0	0	0	0	0	0	0	0	1	0	0	0	0	0	0	0	0
bta-miR-2284e	0	0	0	0	0	58	0	0	0	0	0	0	1	0	0	0	0	0	0	0	0	0	0	1
bta-miR-2486-5p	0	0	0	0	0	0	0	0	0	0	0	0	0	0	0	0	1	0	0	0	0	0	0	0
bta-miR-1388-5p	0	0	0	0	0	0	0	0	0	0	0	0	29	0	0	0	0	0	0	0	0	0	0	0
bta-miR-1388-3p	0	0	0	0	0	0	0	0	0	0	0	0	42	0	0	0	0	0	0	0	0	0	0	0
bta-miR-1468	237	1079	688	779	20	730	1295	1097	725	971	260	299	1112	33	1056	287	104	68	1	1	2	0	0	0
bta-miR-542-5p	0	0	0	0	0	27	66	0	0	0	0	0	0	0	0	0	0	0	0	0	0	0	0	0
bta-miR-669	2808	4998	1599	4956	457	4209	16274	6630	6514	2253	1952	963	4117	428	4454	2229	692	844	3	7	8	2	9	4
bta-miR-2881	1	0	0	0	0	0	1	0	0	0	0	0	0	0	0	0	0	0	2	0	0	0	0	0
bta-miR-2885	0	0	0	0	0	0	0	0	0	0	0	0	0	0	1	0	0	14	0	0	0	0	0	0
bta-miR-2887	0	0	19	0	0	0	0	0	0	0	0	0	29	0	0	0	0	0	0	0	0	6	0	0
bta-miR-2888	0	0	0	0	1	28	0	0	8	1	0	0	2	0	30	1	0	0	0	0	0	0	1	0
bta-miR-2889	356	254	34	321	0	147	173	298	0	376	416	0	105	18	406	559	65	33	2	164	58	282	0	316
bta-miR-2890	164	297	77	6	8	0	61	215	56	103	0	0	132	14	0	75	1	1	0	0	0	1	1	0
bta-miR-2892	943	799	373	107	0	245	513	402	482	194	234	0	384	60	859	153	42	107	0	2	10	0	0	0
bta-miR-2893	0	0	0	0	0	12	0	0	0	0	0	0	0	0	0	0	0	0	0	0	0	0	0	0
bta-miR-2895	0	0	0	0	0	1	0	0	0	0	0	0	0	0	0	0	0	0	0	0	0	0	0	0
bta-miR-2897	1	0	0	0	0	0	0	0	0	0	0	0	0	0	0	0	0	0	0	1	0	0	0	1
bta-miR-2898	2889	5502	2851	7197	575	6220	6967	6942	3241	1710	648	253	10870	984	12324	4072	2081	2300	1256	22156	15433	5313	3625	2647
bta-miR-2899	0	0	0	0	0	0	0	0	0	0	0	0	0	0	0	0	0	15	0	0	0	0	0	0
bta-miR-2900	0	0	0	0	0	1	1	0	0	0	0	0	0	0	1	0	0	0	0	1	1	1	0	1
bta-miR-2903	0	0	0	0	0	31	0	0	91	0	0	0	0	0	0	0	0	0	0	0	0	0	0	0
bta-miR-2284w	504	97	137	62	7	242	136	184	185	445	0	252	585	22	467	0	28	0	0	0	0	0	0	0
bta-miR-3431	2736	7307	2551	6046	398	3141	9878	12263	8185	4089	2259	1513	5833	564	5673	1692	520	703	8	7	11	135	5	3
bta-miR-2284x	1425	2224	1149	1388	93	1781	1103	2317	1296	364	525	3	2880	142	1844	923	217	284	1	22	2	1	0	0
bta-miR-3432a	5616	17454	6199	9911	1018	7646	40964	29485	26516	10080	7440	3557	13140	876	21756	6186	2044	2416	31	19	26	16	14	14
bta-miR-3600	7019	7754	1878	3624	299	3985	7507	9616	4986	4156	1845	1123	5482	570	8144	1727	672	450	8	9	2	7	3	7
bta-miR-148c	1711	4401	1947	3262	285	2707	5243	6776	3661	2727	2095	312	3644	348	4621	1648	318	147	4	3	12	1	3	2
bta-miR-3578	0	0	0	0	0	0	0	0	0	0	0	0	0	0	0	1	0	0	0	0	0	103	0	0
bta-miR-409b	0	0	16	0	0	45	0	0	0	0	0	0	0	0	0	0	0	0	0	0	0	0	0	0
bta-miR-3601	0	0	0	0	0	27	66	0	0	0	0	0	0	0	0	0	0	0	0	0	0	0	0	0
bta-miR-26c	19794	109934	36538	114149	9488	99194	139762	90646	118764	62215	33478	24163	137366	9054	143216	67896	21985	18912	149	205	181	207	89	64
bta-miR-3604	131	63	26	0	22	0	0	0	0	0	0	0	45	2	136	0	0	0	0	0	0	0	0	0
bta-miR-3596	690429	1914198	754252	1527611	166838	1201890	5673996	3875336	3177884	1482386	889141	633005	1901269	124952	2398310	1172038	338672	428339	3106	3291	3445	4540	3685	3971
bta-miR-1246	9787	11399	5782	4803	547	4393	8480	9842	4203	230	365	8	9187	635	10027	1441	520	274	9	117	61	246	211	5
bta-miR-1260b	11	84	62	70	2	98	63	2	80	1	17	96	87	13	90	148	9	2	10	193	161	22	128	89
bta-miR-1277	0	0	0	0	0	72	0	0	105	0	0	0	0	0	0	0	0	0	0	0	0	0	0	0
bta-miR-149-5p	0	81	0	73	10	61	180	0	44	232	0	0	3	0	104	1	0	0	1	0	0	0	0	0
bta-miR-149-3p	0	0	6	0	7	0	0	0	0	523	94	65	59	14	0	0	23	1	0	3	0	1	0	0
bta-miR-3141	82	0	0	0	0	0	0	0	0	112	0	0	4	0	0	0	0	0	0	0	0	0	0	0
bta-miR-3613a	1	29	20	97	5	130	95	0	138	0	0	25	53	1	0	1	0	2	0	0	6	0	1	0
bta-miR-4286	0	38	0	0	0	0	0	0	0	0	0	0	1	0	0	0	0	0	0	1	1	0	0	1
bta-miR-574	2155	1759	718	1256	321	1953	1194	3085	2947	632	542	747	1944	153	2462	985	236	204	1	38	4	469	103	2
bta-miR-652	0	51	94	144	0	78	374	180	101	0	0	167	276	47	658	0	45	63	0	0	1	0	0	0
bta-miR-2284y	273	145	46	163	4	6	184	155	9	3	218	1	295	17	37	79	1	32	0	0	0	0	0	0
bta-miR-2285e	2	33	25	96	0	0	0	0	0	139	256	0	47	4	0	0	0	0	0	0	0	0	0	0
bta-miR-2285f	2934	2019	964	1029	75	1203	1876	4278	2124	2037	320	151	2111	120	3127	580	223	170	1	5	1	3	0	2
bta-miR-2285g	1	0	0	0	0	0	0	0	2	1	0	0	1	0	0	0	1	0	0	0	0	0	0	0
bta-miR-2285h	0	0	0	0	0	0	0	0	0	0	0	0	67	0	2	0	0	0	0	0	0	0	0	0
bta-miR-2285i	132	34	11	2	1	0	2	197	1	4	0	1	5	0	97	1	0	0	0	0	0	0	0	0
bta-miR-2285j	38175	69730	25847	23055	1510	30642	49426	80651	44388	20603	11241	10546	60074	3316	77815	12211	3684	3604	84	85	61	216	33	218
bta-miR-2285k	0	2	0	69	0	1	0	1	0	0	0	0	0	6	0	0	0	0	0	0	0	0	0	0
bta-miR-2285l	222	46	24	26	1	28	38	115	43	72	23	3	46	7	80	15	7	21	0	0	0	0	0	0
bta-miR-6119-5p	797	394	178	165	17	268	337	0	214	139	178	286	354	41	826	336	49	26	1	3	1	1	0	1
bta-miR-6119-3p	108	171	1	144	25	222	0	0	138	176	0	0	77	4	151	105	0	0	0	1	0	0	1	1
bta-miR-6120-5p	0	0	0	0	0	0	0	0	0	0	0	0	0	0	0	1	0	0	0	0	0	0	1	0
bta-miR-6120-3p	0	477	182	51	6	185	385	222	147	121	1	0	425	45	518	153	158	107	1	0	0	2	0	0
bta-miR-6123	333	398	99	176	18	66	293	452	323	0	0	0	235	17	61	101	0	112	1	0	0	0	0	0
bta-miR-6517	73	135	47	80	0	0	0	1	0	0	0	0	26	0	0	0	0	0	0	0	11	0	0	0
bta-miR-3154	0	0	0	0	0	0	1	0	0	0	0	0	0	0	0	1	0	0	0	0	0	0	0	0
bta-miR-2285o	1	5	4	2	0	83	2	7	6	5	0	0	12	0	8	2	2	0	0	0	0	0	0	0
bta-miR-2285n	76496	57082	18754	14262	924	18990	30225	82214	34979	24922	9261	4680	31823	2683	57682	5805	2070	2153	42	46	51	41	31	25
bta-miR-2285p	114	236	95	3	9	117	86	54	148	0	0	0	82	10	120	0	0	18	0	0	0	0	1	0
bta-miR-2285m	0	0	0	0	0	0	0	0	2	1	0	0	0	0	0	0	0	0	0	0	0	0	0	0
bta-miR-378b	0	0	0	0	0	0	4	0	0	0	0	0	0	0	1	0	0	0	0	0	0	0	0	0
bta-miR-6518	20	152	0	225	1	58	361	870	116	0	1	0	63	14	424	0	0	0	0	1	0	0	0	0
bta-miR-6521	0	0	1	0	0	0	0	0	0	0	0	0	0	0	0	0	0	0	0	0	0	0	0	0
bta-miR-6522	95	159	8	0	0	50	0	0	0	0	0	154	38	0	0	0	0	0	0	0	0	0	0	0
bta-miR-3956	0	0	0	0	0	1	0	0	0	0	0	0	0	0	0	0	0	0	0	0	0	0	0	0
bta-miR-411c-5p	0	0	0	0	1	0	0	0	0	0	0	0	0	9	0	0	0	0	0	0	0	0	0	0
bta-miR-154b	0	0	0	0	0	56	0	0	0	0	0	0	0	0	0	0	0	0	0	0	0	0	0	46
bta-miR-3957	0	0	0	0	11	0	0	0	0	0	0	0	0	0	0	0	0	0	0	0	0	0	0	0
bta-miR-1247-5p	0	0	0	0	0	0	0	0	0	0	0	0	20	0	0	0	0	0	2	0	1	0	0	0
bta-miR-1247-3p	42	0	0	0	0	0	0	1	0	0	0	0	0	87	0	0	0	0	1	0	0	0	0	0
bta-miR-378c	0	1	18	0	0	0	72	127	0	1	0	0	34	0	97	0	0	25	1	0	0	0	0	0
bta-miR-6523a	0	44	0	0	0	84	202	441	0	0	0	0	0	3	180	0	0	30	0	0	0	0	0	1
bta-miR-6524	0	42	0	0	0	0	0	0	0	0	0	0	38	0	0	0	0	0	0	0	0	0	0	0
bta-miR-6525	0	0	10	0	0	0	1	0	0	0	0	0	36	0	0	0	0	0	0	0	0	0	0	0
bta-miR-6526	559	1211	390	405	33	260	443	343	244	143	77	0	1029	119	1610	311	23	39	1	1	1	0	0	1
bta-miR-503-5p	0	0	0	0	0	0	0	2	0	0	0	1	0	0	0	0	0	0	0	0	0	0	0	0
bta-miR-2284z	9576	11062	2747	3523	521	5865	3587	9031	10301	2638	1352	879	13508	727	14814	3742	622	631	6	11	12	7	3	3
bta-miR-2284aa	497	280	111	37	19	3	115	159	186	3	1	0	493	22	762	228	13	9	0	0	0	0	1	0
bta-miR-6527	0	34	0	0	0	0	1	0	0	0	1	0	0	0	107	0	0	0	0	0	12	1	0	0
bta-miR-6528	64	0	47	40	0	0	110	240	69	97	0	0	0	1	0	0	0	0	0	1	1	0	0	0
bta-miR-6529a	2065	1170	447	671	33	819	4084	4539	2276	2201	693	291	1424	89	1743	466	110	358	1	2	2	5	2	2
bta-miR-6530	0	0	0	0	0	0	0	0	0	0	0	0	0	0	0	0	0	0	0	13	0	1	0	0
bta-miR-6531	0	0	0	0	0	0	0	0	0	0	0	0	0	0	1	0	0	0	0	0	0	0	0	0
bta-miR-6532	0	0	0	0	0	0	0	0	0	0	0	0	0	0	0	0	0	0	0	0	0	1	0	0
bta-miR-6533	0	0	19	0	0	0	0	122	0	0	0	0	0	0	0	0	0	0	0	0	0	0	0	0
bta-miR-6535	0	1	0	0	0	2	1	1	0	0	0	0	0	0	0	1	0	0	0	2	0	1	0	0
bta-miR-2285q	0	37	23	160	1	49	0	448	124	0	0	1	71	0	116	1	0	0	0	0	0	1	0	0
bta-miR-2285r	186	246	204	77	34	197	219	512	363	554	223	141	437	22	242	20	3	5	0	0	0	1	1	2
bta-miR-2285t	0	368	70	79	0	0	0	183	118	0	0	113	79	24	197	0	0	0	0	0	0	0	0	0
bta-miR-2285v	1	2	0	0	0	0	0	0	0	0	0	0	0	0	0	0	1	0	0	0	0	0	0	0
bta-miR-2285af	1	0	0	0	0	0	0	0	1	0	0	0	1	0	0	0	0	0	0	0	0	0	0	0
bta-miR-2285y	497	280	111	37	19	3	115	159	186	3	1	0	493	22	762	228	13	9	0	0	0	0	1	0
bta-miR-2285w	0	0	0	0	0	0	1	0	0	0	0	1	0	0	0	0	0	0	0	0	0	0	0	0
bta-miR-2285x	95	162	25	92	12	36	91	83	213	15	9	5	63	2	24	3	2	10	0	0	0	0	0	0
bta-miR-3613b	0	0	0	1	0	0	33	0	68	0	0	0	0	0	0	0	0	0	0	0	6	0	0	0
bta-miR-6523b	0	0	0	0	0	0	0	0	0	0	0	0	0	0	0	0	0	1	0	0	0	0	0	0
bta-miR-2285u	113	18	0	0	0	0	4	1	2	0	0	0	1	1	0	0	0	0	0	0	0	0	0	0
bta-miR-7857-5p	0	0	51	0	0	58	23	0	0	0	0	0	67	3	0	0	0	0	0	0	0	0	0	0
bta-miR-7858	217	173	30	557	1	647	273	295	482	0	1	0	233	32	495	155	33	0	0	0	0	0	0	1
bta-miR-7859	0	155	93	171	0	205	115	190	573	0	0	0	111	11	66	0	0	0	0	1	0	1	1	0
bta-miR-2285aa	269	16	5	6	0	14	154	19	159	16	2	3	95	18	20	8	2	0	0	1	0	0	0	0
bta-miR-2285ab	1	19	0	1	0	3	0	1	4	4	1	0	0	0	1	1	0	0	0	0	0	0	0	0
bta-miR-2284ab	3	80	48	70	5	1	248	5	334	0	0	0	213	2	101	230	34	71	0	0	1	0	0	1
bta-miR-664b	0	99	23	167	0	53	268	0	0	0	154	0	152	6	0	0	0	14	0	0	0	0	0	0
bta-miR-7860	0	0	0	0	0	0	0	0	0	0	0	0	0	0	0	0	0	0	0	0	0	2	0	0
bta-miR-2285ac	5	10	4	3	1	2	11	25	13	6	1	1	8	0	10	1	0	0	0	0	0	0	0	0
bta-miR-7861	0	0	0	0	0	0	0	0	0	0	0	0	0	0	0	0	0	0	0	0	0	0	1	0
bta-miR-6516	0	0	0	0	0	0	0	0	0	0	0	0	20	0	0	0	0	0	0	0	0	0	120	0
bta-miR-219	0	28	0	0	0	0	0	0	0	0	0	0	0	0	0	0	0	0	0	0	0	0	0	0
bta-miR-2285ad	243	9	25	4	0	2	3	11	2	5	0	3	79	4	69	4	0	27	0	0	0	0	0	0
bta-miR-2284ac	0	0	0	0	16	0	0	0	0	0	0	0	0	0	0	0	0	0	0	0	0	0	0	0
bta-miR-2285ae	6	15	19	4	1	8	15	33	103	1	0	2	10	2	9	1	1	1	0	0	0	0	0	0
bta-miR-7864	0	0	0	0	0	0	0	0	0	0	0	0	0	1	0	0	0	0	0	0	0	0	0	0
bta-miR-7865	4	0	3	1	0	0	0	0	0	1	0	1	0	1	4	0	0	0	0	2	2	0	3	3
bta-miR-8550	0	0	0	0	0	0	0	0	0	0	0	0	0	0	0	0	0	0	0	0	0	1	0	0
bta-miR-1842	0	0	0	0	0	30	0	0	0	0	92	85	0	0	0	0	0	15	0	6	0	0	0	0
bta-miR-4449	0	0	0	2	0	24	0	0	0	0	0	0	0	0	0	0	0	0	0	0	0	0	0	0
bta-miR-3432b	3	11	9	3	0	4	20	17	13	9	5	1	36	1	16	3	1	1	0	0	0	0	0	0
bta-miR-2450d	0	0	0	0	0	0	0	0	0	0	0	0	0	0	0	1	0	0	0	0	0	0	0	0
bta-miR-4444	0	0	0	1	0	0	0	0	0	0	0	0	0	0	0	0	0	0	0	0	0	0	0	0
bta-miR-10020	0	0	9	0	0	0	0	0	0	0	0	0	0	0	0	0	0	0	0	17	0	0	0	0
bta-miR-10165-5p	0	0	0	1	0	0	0	0	0	0	0	0	0	0	0	1	0	0	0	2	0	0	0	0
bta-miR-10167-3p	2	67	66	0	0	111	125	373	127	112	0	1	122	12	249	3	67	1	18	19	37	111	1	2
bta-miR-507-3p	0	37	22	0	0	0	0	0	0	203	0	0	0	8	0	0	0	0	0	0	0	0	0	0
bta-miR-10170-5p	0	33	0	0	0	0	0	0	0	191	0	0	0	0	0	0	0	0	0	0	0	0	0	0
bta-miR-10172-3p	0	0	0	0	0	53	1	0	0	0	0	0	34	0	116	0	0	0	0	0	0	0	0	0
bta-miR-10173-5p	0	24	0	0	0	0	1	0	0	0	0	0	0	0	0	0	0	0	0	0	0	0	0	0
bta-miR-7857-3p	0	0	0	0	0	0	0	0	0	0	0	0	0	0	1	0	0	0	0	0	0	0	0	0
bta-miR-10174-5p	0	0	1	0	0	0	0	0	72	0	0	0	0	0	0	0	0	0	0	0	0	0	0	0
bta-miR-10174-3p	1378	4989	1640	4069	345	3152	9438	4036	3966	3316	2202	1112	5658	449	5512	2374	711	690	57	360	178	413	764	373
bta-miR-10175-5p	0	0	0	0	0	0	0	0	119	0	0	0	3	0	0	0	0	0	0	0	0	0	0	0
bta-miR-10175-3p	0	18	0	32	0	1	0	0	0	97	0	84	1	0	0	177	0	0	0	0	0	0	87	0
bta-miR-10177-5p	0	0	0	0	0	0	0	0	0	0	0	0	2	0	0	0	0	0	0	0	0	0	0	0
bta-miR-10178-5p	0	0	0	0	0	0	0	0	0	0	0	0	0	0	0	1	0	0	0	0	0	0	0	0
bta-miR-194b-3p	0	34	0	0	0	0	0	0	0	152	0	0	0	1	0	0	0	0	0	1	0	0	0	0
bta-miR-668-3p	0	0	0	0	1	0	0	0	0	0	0	0	0	0	0	0	0	0	0	0	0	0	0	0
bta-miR-10179-5p	65	89	18	0	0	50	63	244	129	0	0	0	42	5	2	0	0	31	0	0	11	0	0	0
bta-miR-10180-3p	0	0	0	0	0	0	0	0	0	0	0	0	0	0	0	0	1	0	0	0	0	0	0	0
bta-miR-10181-5p	0	0	0	1	0	46	0	0	0	0	0	0	0	0	0	0	0	0	0	7	0	0	0	0
bta-miR-10182-5p	0	0	54	0	0	4	67	0	103	0	0	0	0	0	0	0	0	0	0	0	0	0	0	0
bta-miR-10182-3p	2	0	1	1	0	11	0	0	0	0	0	0	0	0	0	0	0	0	0	0	1	0	0	0
bta-miR-10183-5p	0	0	0	0	0	0	0	0	0	0	1	0	1	0	0	0	0	0	0	0	0	0	0	0
bta-miR-10185-5p	1	1	0	0	0	0	0	0	0	0	0	0	2	0	0	2	11	1	1	3	3	1	1	0
bta-miR-2285ah-5p	1	0	0	0	0	1	0	139	0	1	0	0	0	0	0	1	0	1	0	2	0	121	1	0
bta-miR-2285aj-5p	4724	9001	4433	4473	335	6550	6143	12742	4509	2850	1805	1189	6807	385	6400	2064	1156	470	7	12	8	6	8	7
bta-miR-2285al-5p	112	152	34	85	7	67	59	104	277	60	19	23	281	13	201	56	17	6	0	0	0	0	0	0
bta-miR-2285am-5p	3	4	1	39	0	4	6	12	91	1	0	2	11	0	10	0	0	0	0	0	0	0	0	0
bta-miR-10225a	0	0	0	0	0	0	0	0	0	0	0	0	0	0	0	0	0	0	0	0	0	0	0	1
bta-miR-10225b	0	0	0	0	0	0	0	0	0	0	0	0	0	0	0	0	0	0	0	0	0	0	0	1
bta-miR-11971	0	51	0	0	0	49	185	0	0	0	113	0	34	3	1	0	31	0	0	1	0	0	1	0
bta-miR-2285ar	112	0	0	0	0	0	0	47	0	0	0	0	0	3	0	0	0	0	0	0	0	0	0	0
bta-miR-2285as	9	17	4	49	0	3	8	16	5	4	2	0	12	0	10	1	0	0	0	0	0	0	0	0
bta-miR-11972	441	252	101	181	8	194	181	37	203	297	100	0	169	23	149	75	1	1	1	2	1	1	0	0
bta-miR-2285at	270	755	212	410	11	219	478	1012	247	385	257	4	564	41	691	143	23	57	0	1	13	2	0	0
bta-miR-2285au	144	276	76	168	2	98	97	595	61	20	11	6	296	15	182	5	46	12	0	0	0	1	0	0
bta-miR-2285av	4	20	25	12	4	4	3	16	5	1	0	1	168	3	2	79	0	31	0	0	0	0	0	0
bta-miR-2285aw	8	10	3	9	0	11	8	9	9	5	5	0	10	0	19	2	0	3	0	0	0	0	0	0
bta-miR-2285ax	3	0	1	0	0	2	7	4	4	1	0	0	15	1	0	0	0	0	0	0	0	0	0	0
bta-miR-11975	90	167	47	47	1	23	2	321	20	106	137	0	44	5	38	1	34	55	0	28	10	1	2	4
bta-miR-2285ay	6	11	1	0	0	3	7	12	6	1	1	0	9	0	2	0	0	0	0	0	0	1	0	0
bta-miR-2285az	0	1	1	1	0	0	2	1	0	1	0	0	19	1	1	0	0	0	0	0	0	0	0	0
bta-miR-11976	136	275	66	47	1	23	69	478	20	107	137	0	91	20	162	1	53	69	0	28	10	1	2	4
bta-miR-2285an	0	1	0	0	0	0	0	1	0	0	0	0	4	0	0	0	1	0	0	0	0	0	0	0
bta-miR-11977	0	0	0	2	0	1	1	0	2	0	138	0	2	0	0	0	0	0	0	0	0	0	0	0
bta-miR-2285ao	223	87	10	0	0	0	1	215	1	0	0	0	3	5	64	0	3	0	0	0	0	0	0	0
bta-miR-2285ap	112	0	0	0	0	0	0	48	0	1	0	0	0	3	0	0	0	0	0	0	0	0	0	0
bta-miR-11978	0	0	18	34	0	41	0	0	0	0	0	0	0	0	58	0	1	0	0	24	2	0	0	0
bta-miR-11979	0	0	0	0	0	1	0	0	0	0	0	0	0	0	0	0	0	0	1	0	0	0	0	0
bta-miR-11980	7805	6845	3654	2747	170	4432	1205	2739	609	4575	4880	1083	6145	792	9322	1225	434	734	402	6490	9424	2710	1134	1625
bta-miR-6715	0	0	0	0	0	0	0	0	0	0	0	0	0	0	0	0	0	9	0	0	0	0	0	0
bta-miR-11981	1	44	0	0	0	0	0	161	0	0	0	0	0	0	0	0	0	0	0	0	0	0	0	0
bta-miR-9851	133	0	58	0	0	0	94	213	285	0	0	0	132	5	0	130	0	25	0	0	0	0	0	0
bta-miR-11982	0	35	0	0	0	0	103	0	0	0	0	0	0	6	145	264	0	0	0	19	0	0	0	0
bta-miR-2285ba	135	127	34	86	1	75	111	206	147	90	14	6	124	4	172	29	9	5	1	1	0	0	1	0
bta-miR-2285bb	3	55	3	61	0	51	5	1	15	1	0	0	57	23	2	1	0	15	0	0	0	0	0	0
bta-miR-2285bc	64	97	41	31	3	27	77	119	62	33	15	8	71	4	113	121	3	3	0	0	0	2	0	0
bta-miR-11984	0	0	0	0	0	0	87	0	60	0	0	0	35	0	0	0	0	1	0	2	0	2	2	2
bta-miR-2285be	592	1496	316	588	83	942	662	1535	2415	1032	85	445	2190	135	1762	418	149	91	1	2	2	1	1	1
bta-miR-11985	0	34	0	4	12	27	0	1	1	0	0	0	1	0	90	0	0	30	0	0	0	0	0	0
bta-miR-2285bf	925	2274	570	1121	146	1985	1066	1769	2623	1166	374	687	2970	208	3591	588	394	155	1	2	2	1	1	1
bta-miR-11986	0	0	0	0	0	1	0	0	0	0	0	0	0	1	0	0	0	0	0	0	0	0	0	0
bta-miR-2285bg	0	4	2	3	0	2	0	0	1	0	0	1	8	0	64	0	0	0	0	0	0	0	0	0
bta-miR-11987	4438	1999	376	570	57	834	487	863	319	736	718	260	1386	126	1956	657	137	171	34	282	351	1010	496	703
bta-miR-2285bh	3	4	0	43	0	59	185	5	3	208	8	0	53	6	1	1	0	0	0	0	0	0	0	0
bta-miR-2285bi	110	0	0	0	0	0	0	48	0	0	0	0	0	3	0	0	0	0	0	0	0	0	0	0
bta-miR-2285bj	29	25	15	60	2	14	18	56	23	19	5	2	27	1	30	6	1	3	1	0	0	0	0	0
bta-miR-11988	0	0	22	35	0	0	0	0	0	0	232	0	70	0	6	0	48	0	1	25	52	0	0	1
bta-miR-374c	1	3	0	7	0	6	0	2	8	3	0	0	34	0	135	0	1	0	0	0	0	0	0	0
bta-miR-11986b	0	567	43	844	12	861	384	1	1279	830	389	26	838	33	528	339	157	86	1	1	0	0	0	0
bta-miR-2285bk	2	3	1	3	0	3	2	0	99	3	3	0	4	0	6	1	0	0	1	0	0	0	0	0
bta-miR-2285bl	199	4	25	0	14	33	164	5	129	138	0	0	124	6	257	0	0	0	0	0	0	0	0	0
bta-miR-2285bm	1	38	0	0	0	0	0	2	0	0	0	0	0	0	0	0	0	0	0	0	0	0	0	0
bta-miR-2285bn	2399	3464	868	1137	33	1447	2519	4658	3143	1643	658	141	2823	217	2682	537	179	221	4	5	2	2	2	0
bta-miR-7180	0	0	19	0	0	0	0	0	0	0	0	89	52	0	0	1	0	0	0	0	0	0	0	0
bta-miR-2285bo	11	23	9	9	0	18	9	20	40	19	3	4	24	1	23	8	3	0	0	7	0	0	0	0
bta-miR-11989	1	2	31	0	0	1	88	0	0	0	0	0	5	0	8	1	0	1	0	2	6	0	0	0
bta-miR-11990	0	0	0	0	0	0	0	0	0	0	0	0	0	0	0	0	0	0	0	0	0	4	0	1
bta-miR-1911	675	1361	628	998	119	573	1584	3481	797	1775	482	287	1008	78	1087	514	252	96	1	1	5	3	2	1
bta-miR-11992	0	0	0	0	0	0	0	253	0	0	0	0	49	0	0	0	1	0	1	0	0	0	0	0
bta-miR-2285bp	0	1	0	0	0	0	0	0	0	0	0	0	9	0	94	0	0	0	0	0	0	1	0	0
bta-miR-11993	0	47	20	109	0	0	394	0	0	0	0	1	121	0	2	0	0	23	0	0	0	0	0	0
bta-miR-2285bq	134	3	1	3	0	2	3	13	3	2	1	1	2	4	3	1	0	18	0	0	0	0	0	0
bta-miR-2285br	0	61	1	1	0	1	2	0	2	0	1	0	0	0	1	0	0	0	0	0	0	0	0	0
bta-miR-2285bs	0	0	0	2	0	1	0	0	0	0	6	0	1	0	0	0	0	0	0	0	0	0	0	0
bta-miR-11986c	0	0	23	0	0	0	0	0	1	220	216	152	23	11	1	1	0	0	0	0	2	0	0	1
bta-miR-2285bt	1	0	0	3	0	0	0	6	0	0	0	0	2	0	0	0	0	0	0	0	0	0	0	0
bta-miR-2285bu	13	6	5	99	1	5	13	32	41	6	125	2	65	0	10	3	1	1	0	0	0	0	0	0
bta-miR-2285bv	8483	10259	2471	3235	481	5384	3248	8189	9707	2313	1093	886	12481	664	13556	3078	610	626	6	8	11	6	2	3
bta-miR-2285bw	1	0	1	1	0	0	58	2	1	0	0	0	2	1	0	0	0	0	0	0	0	0	0	0
bta-miR-2285bx	0	0	0	0	0	0	0	0	1	0	0	0	1	0	0	0	0	0	2	19	0	0	0	0
bta-miR-2285by	1803	3645	1146	1147	191	2140	1812	1745	3723	1902	565	1139	5305	246	8128	1846	368	395	3	4	6	3	3	2
bta-miR-2285bz	118	15	22	0	0	1	0	6	1	0	0	0	2	0	66	0	0	9	0	0	0	0	0	0
bta-miR-11994	0	33	0	0	0	0	0	0	0	0	0	0	0	0	0	0	0	0	0	0	0	0	0	0
bta-miR-11995	0	26	0	54	13	0	0	48	0	0	0	0	36	0	0	0	0	0	0	0	0	0	0	0
bta-miR-11996	0	0	0	0	2	0	0	0	0	0	0	0	20	0	0	0	0	0	1	0	0	0	0	0
bta-miR-2285ca	1	1	21	95	0	1	2	2	2	2	126	0	57	0	54	0	0	1	0	0	0	0	0	0
bta-miR-2285cb	63	28	10	13	2	9	11	38	21	19	10	1	14	2	28	9	4	1	0	0	18	0	0	0
bta-miR-2285cc	43486	75142	27685	24131	1574	32766	53980	89990	48499	22449	11720	10971	64327	3565	85024	13046	3938	4069	88	89	67	222	34	220
bta-miR-11997	0	4	0	1	0	3	0	1	0	0	0	0	7	0	5	0	0	0	0	14	7	5	0	0
bta-miR-2285cd	188	333	116	135	9	143	255	410	292	103	45	37	276	8	248	52	17	21	0	1	1	1	1	1
bta-miR-1264	0	154	47	107	0	0	104	135	115	0	0	0	122	0	1	0	23	0	0	1	0	0	0	0
bta-miR-2285ce	44353	77180	28231	24864	1601	33260	55080	92537	49341	23241	12619	11085	65855	3663	86718	13313	3993	4170	88	90	66	227	36	224
bta-miR-12001	0	0	0	0	0	0	0	0	0	0	0	0	1	0	0	0	0	0	0	0	0	0	0	0
bta-miR-12003	0	0	0	1	0	0	0	0	0	0	0	0	0	0	0	0	0	0	0	0	0	0	0	0
bta-miR-2285cf	211	94	1	4	0	2	11	4	7	0	9	0	11	1	4	1	0	2	0	0	0	0	0	0
bta-miR-12004	0	1	0	0	0	0	0	1	0	0	0	0	0	0	0	0	0	0	0	0	0	0	1	0
bta-miR-12005	0	30	0	0	0	0	0	0	0	0	0	0	0	0	0	0	0	0	0	0	0	0	0	0
bta-miR-12006	0	0	0	0	0	0	0	0	0	1	0	0	0	0	0	0	0	0	0	0	0	1	0	0
bta-miR-148d	212	821	215	563	106	567	1223	1490	994	385	657	210	1292	67	1769	339	322	132	0	1	2	1	1	2
bta-miR-2285ci	44	5	0	1	0	3	0	8	4	5	1	1	1	0	1	3	0	0	0	0	0	0	0	0
bta-miR-6775	0	28	1	0	0	45	0	0	0	0	0	0	0	0	0	0	0	0	0	0	0	0	1	0
bta-miR-2285cj	149	45	0	0	0	0	62	1	0	0	0	0	3	1	0	0	0	0	0	0	0	0	0	0
bta-miR-12008	0	1	0	0	0	0	0	0	0	0	0	0	0	0	0	0	0	0	0	0	1	0	0	0
bta-miR-2285cl	0	416	2	115	12	37	125	299	1	0	1	0	133	6	0	232	0	0	0	0	0	0	0	0
bta-miR-2285cm	202	301	104	106	17	64	120	693	167	171	28	9	407	9	283	39	9	16	1	1	0	0	0	0
bta-miR-2285cn	0	0	0	0	0	0	0	0	0	0	0	0	0	0	1	0	0	0	0	0	0	0	0	0
bta-miR-12013	0	0	0	0	0	0	0	1	0	0	0	0	0	0	0	1	0	0	0	0	0	0	0	0
bta-miR-2285co	3	1	1	0	0	0	2	4	22	1	0	0	57	0	134	0	0	0	0	0	0	0	0	0
bta-miR-2285cp	6	4	0	2	10	1	51	6	95	2	0	0	38	1	5	1	26	0	0	0	0	0	0	0
bta-miR-2285cq	1349	1843	367	1137	111	1116	747	957	1633	236	541	515	2304	126	2290	856	205	192	0	1	2	1	1	3
bta-miR-12014	62	30	24	0	0	25	1	119	52	0	0	0	5	5	64	1	5	19	0	0	2	0	0	0
bta-miR-12015	0	0	0	0	0	0	1	0	1	1	0	0	0	0	0	0	0	0	0	0	0	0	5	0
bta-miR-2285cr	19	55	5	7	0	15	10	34	23	7	4	5	20	1	18	5	0	0	0	0	0	0	0	0
bta-miR-2285cs	44031	75964	27952	24462	1593	33052	54544	90898	49164	22714	11941	11077	65012	3599	85805	13194	3988	4101	88	90	69	224	35	223
bta-miR-2285ct	97	140	0	0	14	0	84	0	87	0	101	0	0	0	0	0	0	0	0	0	1	0	0	0
bta-miR-2285cv	0	0	0	0	0	0	0	4	2	0	0	0	0	0	0	0	0	0	0	0	0	0	0	0
bta-miR-12018	0	0	0	0	0	0	0	1	0	0	0	0	0	0	0	0	0	0	0	0	0	0	0	0
bta-miR-2285cw	0	0	0	0	0	0	49	1	1	0	0	0	28	0	0	0	25	0	0	0	0	0	0	0
bta-miR-2285cx	3	2	0	1	0	0	0	2	0	1	1	0	1	1	1	0	0	0	0	0	0	0	0	0
bta-miR-2285cy	0	1	1	0	0	1	0	0	0	0	0	0	1	0	0	0	0	0	0	0	0	0	0	0
bta-miR-2285cz	10	11	1	0	0	0	6	17	7	1	0	0	8	0	5	0	1	0	0	0	0	0	0	0
bta-miR-2285da	9581	16878	5815	5587	335	6037	10109	20333	12108	4715	1391	1806	13346	651	18317	3156	691	590	19	40	14	193	6	9
bta-miR-12019	0	0	0	0	0	0	0	0	0	0	0	0	0	1	0	0	0	0	0	0	0	3	0	1
bta-miR-2285db	102	37	7	3	0	4	48	8	9	0	0	0	32	0	6	0	0	0	0	0	0	0	0	0
bta-miR-2285dc	4	17	1	39	9	38	81	12	91	1	0	2	11	0	10	0	0	0	0	0	0	1	0	0
bta-miR-2285dd	9317	16335	5403	5219	319	5783	9491	19877	11857	4555	1573	1957	12655	627	17555	2666	654	562	18	38	13	193	8	8
bta-miR-2285de	2340	2932	844	1001	122	948	1468	3488	2638	802	300	573	2130	163	2842	230	81	128	2	1	3	3	2	4
bta-miR-12023	0	0	0	0	0	0	0	95	0	0	0	0	0	0	0	0	0	0	0	0	0	0	0	1
bta-miR-12025	0	0	0	0	11	0	0	0	0	0	0	0	0	0	0	0	0	0	0	16	0	0	0	1
bta-miR-12030	242	68	51	71	7	36	210	374	174	99	1	0	118	7	66	2	0	0	0	0	0	0	1	0
bta-miR-12031	0	0	0	0	0	0	0	0	0	0	0	0	0	0	0	7	0	0	0	0	0	0	0	0
bta-miR-12032	0	0	0	0	0	0	0	0	0	0	0	0	0	0	0	0	0	19	0	0	0	0	0	0
bta-miR-12034	72	58	15	2	0	0	0	1	0	1	0	0	33	0	0	0	0	0	0	0	0	0	0	0
bta-miR-12035	0	0	0	1	0	0	0	0	0	0	0	0	0	0	0	0	0	0	0	0	0	0	0	0
bta-miR-2285df	6	2	0	2	0	0	3	9	1	0	1	0	9	0	2	0	1	0	0	0	0	0	0	0
bta-miR-194b	0	34	0	70	0	0	1	0	0	152	0	0	0	1	0	0	0	0	0	1	0	0	0	0
bta-miR-12036	1	0	0	0	0	3	0	0	0	0	0	0	0	0	7	2	0	0	0	2	1	1	0	0
bta-miR-12038	0	0	0	0	0	0	0	0	0	0	0	0	0	1	0	0	0	0	0	0	0	0	0	0
bta-miR-2285dg	82	109	36	13	0	18	36	144	38	43	10	9	31	9	88	10	1	1	0	0	0	0	0	0
bta-miR-191b	0	51	48	0	0	0	153	6	0	0	0	0	19	10	168	0	1	0	0	0	0	0	0	0
bta-miR-12042	0	0	0	0	0	0	0	0	0	0	0	0	0	0	0	0	0	0	0	0	0	19	0	0
bta-miR-3065	140	161	107	21	0	66	0	123	0	181	0	0	38	0	0	166	0	1	1	0	0	0	0	0
bta-miR-507b	0	174	83	1	18	63	265	5	0	0	1	0	60	20	98	91	0	0	0	0	0	0	1	0
bta-miR-2285dh	0	0	0	0	0	0	0	0	0	0	0	0	6	0	0	0	0	0	0	0	0	0	0	0
bta-miR-2285di	336	122	60	87	16	109	278	213	258	90	12	6	188	10	292	28	9	5	1	1	1	0	1	0
bta-miR-2285dj	0	8	1	0	0	1	3	6	1	0	0	1	4	0	0	0	0	0	0	17	0	0	0	0
bta-miR-12046	0	0	0	0	0	0	0	0	0	0	0	0	0	0	0	0	0	1	0	0	2	0	0	0
bta-miR-2285dk	55	0	0	0	0	0	0	0	0	0	1	0	0	0	0	0	0	0	0	0	0	0	0	0
bta-miR-12048	0	0	0	0	0	0	0	0	0	0	0	0	0	0	1	0	0	0	0	0	0	0	0	0
bta-miR-12049	0	0	0	0	0	0	0	0	0	1	0	1	0	0	0	0	0	0	2	1	0	0	0	0
bta-miR-12050	0	0	0	0	0	0	0	0	0	0	1	1	0	0	0	0	0	0	0	0	0	0	0	0
bta-miR-2285dl-3p	22	22	7	97	0	14	20	223	13	25	257	4	44	0	21	4	4	3	0	0	0	0	0	0
bta-miR-12055	0	0	0	0	1	38	0	0	0	0	0	0	0	0	0	0	0	16	0	0	0	0	0	0
bta-miR-12056	1	0	0	1	0	0	0	123	1	0	0	0	0	6	0	0	0	0	0	12	0	0	0	0
bta-miR-12057	0	0	21	2	0	30	37	103	57	0	0	0	0	0	1	277	0	25	1	0	0	2	142	0
bta-miR-12058	0	0	33	15	7	60	0	0	94	93	0	0	24	0	0	66	21	0	6	137	100	90	0	130
bta-miR-12059	0	0	0	0	0	0	0	1	0	1	0	0	0	0	57	0	0	3	0	0	0	0	0	1
bta-miR-12061	0	0	0	0	0	0	0	0	0	0	0	0	0	0	0	0	0	0	0	10	0	0	1	1
bta-miR-12062	0	0	0	0	0	0	0	0	0	0	0	0	0	0	0	87	0	0	0	0	10	1	0	0
bta-miR-12064	0	0	0	0	0	0	1	0	0	0	0	0	0	0	0	1	0	0	0	0	0	0	0	0
