# Supplementary material for: Effect of cryopreservation and semen extender on extracellular vesicles isolated from bull semen
Source: Front Vet Sci. 2024 Jul 30;11:1437410. doi: 10.3389/fvets.2024.1437410 (PMC11321215; doi:10.3389/fvets.2024.1437410)
Supplement: Supplementary Table S6 — Differentially expressed miRNA (DE-miRNAs) identified comparing different preparations. Value of Logarithmic Fold Change (logFC), Logarithmic Count Per Million (logCPM), P-Value, and False Discovery Rate (FDR) were reported. [file Table_6.XLSX]

## Sheet: E-EVsvs other UC 
	logFC	logCPM	PValue	FDR
bta-miR-2898	-9.86065	16.1598	4.32195e-66	1.83683e-63
bta-miR-11980	-8.79631	14.9737	9.76095e-39	2.0742e-36
bta-miR-23b-3p	-4.7791	11.636	1.08837e-33	1.54186e-31
bta-miR-23a	-4.38303	11.818	1.2332e-30	1.31027e-28
bta-miR-1	-7.14485	12.8184	1.95076e-29	1.41511e-27
bta-miR-2478	-10.3596	16.6952	1.9978e-29	1.41511e-27
bta-miR-10174-3p	-4.4846	11.6626	3.729e-29	2.26404e-27
bta-miR-1260b	-9.65121	9.78565	1.63831e-20	7.95192e-19
bta-miR-2388-3p	-6.39636	9.80719	1.68394e-20	7.95192e-19
bta-miR-11987	-5.92922	12.017	1.99442e-20	8.47627e-19
bta-miR-11997	-10.6895	4.61058	1.91648e-10	7.40457e-09
bta-miR-769	-6.32673	8.88806	2.12947e-10	7.54187e-09
bta-miR-2325c	-9.01934	7.21175	3.01743e-10	9.86467e-09
bta-miR-2285cb	-6.62245	4.10355	6.20988e-10	1.88514e-08
bta-miR-2889	-7.40568	10.2913	1.89719e-09	5.37537e-08
bta-miR-205	-2.33937	11.782	3.46588e-09	9.20623e-08
bta-miR-2407	-12.2318	7.52237	4.94094e-09	1.23524e-07
bta-miR-12058	-10.8078	9.4468	6.09204e-09	1.4384e-07
bta-miR-12061	-12.6156	2.50075	5.9327e-08	1.32705e-06
bta-miR-2358	-7.67888	8.2527	8.05117e-08	1.71087e-06
bta-miR-10167-3p	-6.66562	7.90328	9.78269e-08	1.97983e-06
bta-miR-11975	-6.14319	5.94579	1.43702e-07	2.77607e-06
bta-miR-2340	-7.73899	9.00973	2.30845e-07	4.26562e-06
bta-miR-2441	-13.7715	4.35322	2.77318e-07	4.91084e-06
bta-miR-320b	-9.88353	-0.363752	1.01176e-06	1.71999e-05
bta-miR-11976	-5.22547	6.02464	1.46033e-06	2.38708e-05
bta-miR-10185-5p	-10.5671	1.78046	1.77161e-06	2.78865e-05
bta-miR-2454-5p	-10.9467	0.502398	3.64444e-06	5.53174e-05
bta-miR-2285bo	-5.83028	1.95458	4.00872e-06	5.87485e-05
bta-miR-2447	-8.72127	4.79867	5.49218e-06	7.78058e-05
bta-miR-1842	-11.88	2.66167	8.83429e-06	0.000118954
bta-miR-2305	-7.15316	2.18622	8.95652e-06	0.000118954
bta-miR-2900	-9.48329	-0.711721	1.21413e-05	0.000156365
bta-miR-184	-4.51637	9.59995	1.44937e-05	0.000181171
bta-miR-18b	-9.61276	3.93579	1.78326e-05	0.000216539
bta-miR-12025	-13.2872	3.75521	2.86655e-05	0.000338412
bta-miR-11988	-9.91499	6.77704	3.68542e-05	0.000423325
bta-miR-7	-2.20024	11.7995	5.38402e-05	0.00060216
bta-miR-7865	-7.83123	1.95134	7.94265e-05	0.000865545
bta-miR-12036	-8.73523	-0.508655	0.000162207	0.00172345
bta-miR-12062	-12.7014	2.67683	0.000202003	0.00209393
bta-miR-365-5p	-10.0986	-0.138126	0.000330742	0.00334679
bta-miR-11978	-8.69084	4.70241	0.000448418	0.00443204
bta-miR-11989	-6.28756	1.77405	0.000847344	0.00818457
bta-miR-483	-6.43039	4.28186	0.00354432	0.0334742
bta-miR-6527	-7.23426	3.02477	0.00474932	0.0438796
bta-miR-345-3p	-4.85399	4.17818	0.0052865	0.0478035
bta-miR-346	-7.09274	1.14145	0.00558837	0.0494803
bta-miR-767	-9.59029	4.76848	0.00620343	0.0538053
bta-miR-12056	-6.79935	2.81425	0.00642016	0.0545714
bta-miR-9-5p	-2.26552	6.80533	0.0079391	0.0656808
bta-miR-126-3p	-3.13886	6.26941	0.00803624	0.0656808
bta-miR-1247-5p	-7.90881	-0.738203	0.00886843	0.0711148
bta-miR-3613a	-4.68935	2.83519	0.0103207	0.0812276
bta-miR-10179-5p	-4.61527	3.5074	0.0105335	0.0813952
bta-miR-2285at	-2.25271	5.44586	0.0108995	0.0827197
bta-miR-2382-3p	-8.2748	2.987	0.0144839	0.107994
bta-miR-574	-1.73847	9.6841	0.0192891	0.141343
bta-miR-2285ah-5p	-4.92249	7.02182	0.0211157	0.151155
bta-miR-105a	-6.50846	3.66321	0.0213395	0.151155
bta-miR-4286	-6.28865	-0.510702	0.0220628	0.153716
bta-miR-130a	-5.32924	4.31234	0.0239758	0.16435
bta-miR-11982	-6.4918	4.32262	0.0260524	0.17575
bta-miR-1246	-1.74541	10.1632	0.026711	0.177378
bta-miR-130b	-6.1887	2.13653	0.0276578	0.180839
bta-miR-1777a	-5.43245	7.15788	0.0281613	0.181341
bta-miR-93	1.54555	8.01676	0.0312084	0.197964
bta-miR-2455	-7.40756	1.97894	0.0320936	0.198805
bta-miR-34a	-2.8908	4.75464	0.0322765	0.198805
bta-miR-3613b	-6.50449	0.882254	0.0351395	0.213347
bta-miR-320a	-1.03869	11.3086	0.0359123	0.214968
bta-miR-6517	-5.44284	3.09706	0.0371826	0.21948
bta-miR-2304	-4.62875	2.47123	0.0398469	0.231986
bta-miR-2436-5p	-5.19108	2.40679	0.0461706	0.265169
bta-miR-1777b	-5.31538	0.56846	0.0508357	0.288069
bta-miR-2285n	1.05055	11.1702	0.0542411	0.303322
bta-miR-143	-5.30937	4.27562	0.0699742	0.386221
bta-miR-29d-5p	1.49334	7.39285	0.0757942	0.412981
bta-miR-32	-2.9603	5.24711	0.0772826	0.415761
bta-miR-149-3p	-4.2178	3.33201	0.0794016	0.421821
bta-miR-2409	-4.91373	5.78112	0.0815788	0.428037
bta-miR-11984	-4.1374	1.76913	0.0911391	0.472367
bta-miR-2410	-5.77667	2.23266	0.0973161	0.498306
bta-miR-125b	0.476128	14.9915	0.10258	0.515705
bta-miR-11996	-6.4077	-0.973755	0.103141	0.515705
bta-miR-2285r	10.2379	4.6222	0.105138	0.519578
bta-miR-196a	-1.44704	8.16246	0.106601	0.52075
bta-let-7e	0.684318	11.317	0.108115	0.522147
bta-miR-2285y	10.418	3.93963	0.11722	0.554059
bta-miR-2284aa	10.418	3.93963	0.11733	0.554059
bta-miR-1284	-4.85401	1.057	0.119202	0.556714
bta-miR-190a	10.3859	4.29438	0.12263	0.565829
bta-miR-2285bv	1.00923	8.75013	0.123817	0.565829
bta-miR-11986c	-3.90512	3.24858	0.126283	0.570959
bta-miR-194b	-5.03685	1.05988	0.131494	0.58238
bta-miR-1251	10.2143	3.98057	0.133736	0.58238
bta-miR-3600	0.984098	8.53405	0.133736	0.58238
bta-miR-2285cq	1.5223	6.59285	0.13429	0.58238
bta-miR-2284w	10.3145	4.30614	0.138354	0.593943
bta-miR-2284z	0.937181	8.89094	0.143875	0.61147
bta-let-7a-5p	0.378932	17.1336	0.145348	0.611612
bta-miR-2892	-1.5535	5.44494	0.149067	0.615389
bta-miR-10a	0.425238	14.842	0.149141	0.615389
bta-miR-2284n	0.930768	8.73692	0.152504	0.623214
bta-miR-491	10.1876	3.90881	0.160145	0.642752
bta-miR-12014	-2.78952	1.75054	0.161676	0.642752
bta-miR-2443	10.2433	3.76981	0.162373	0.642752
bta-miR-7858	10.1143	4.1237	0.163335	0.642752
bta-miR-2285bf	1.19728	6.93992	0.167948	0.653854
bta-miR-2284x	-1.13489	6.99124	0.170099	0.653854
bta-miR-1307	9.95094	7.77149	0.170832	0.653854
bta-miR-2285de	1.15474	6.93836	0.17468	0.653854
bta-miR-3596	0.363642	17.2925	0.175118	0.653854
bta-let-7b	0.363642	17.2925	0.17578	0.653854
bta-miR-2285au	9.62299	3.3846	0.177858	0.653854
bta-miR-146b	-1.72901	5.19681	0.178898	0.653854
bta-miR-222	1.35644	6.23423	0.18027	0.653854
bta-miR-204	0.891154	8.24934	0.181541	0.653854
bta-miR-2285bj	-2.71675	1.22907	0.185164	0.661301
bta-miR-1584-5p	-4.11927	-0.176177	0.190274	0.673886
bta-miR-6529a	1.21264	6.88413	0.191984	0.673889
bta-miR-182	0.667596	11.3231	0.194052	0.673889
bta-miR-181b	9.87164	7.30083	0.195031	0.673889
bta-miR-194b-3p	-5.04218	0.777123	0.197702	0.677608
bta-miR-669	0.824134	8.43473	0.215432	0.730899
bta-miR-2285al-5p	9.25975	3.08524	0.217267	0.730899
bta-miR-452	0.817831	8.35508	0.21841	0.730899
bta-miR-12057	-3.04804	7.40566	0.221219	0.734516
bta-miR-2285f	1.01386	6.96528	0.223391	0.735979
bta-miR-421	1.90685	5.17968	0.228765	0.743612
bta-let-7c	0.460233	14.3257	0.229207	0.743612
bta-miR-2284y	9.34361	3.36929	0.234453	0.754477
bta-miR-195	9.20433	3.95997	0.236107	0.754477
bta-miR-12030	9.31068	2.93249	0.244376	0.775073
bta-miR-125a	0.442407	12.9853	0.24913	0.783523
bta-miR-197	-1.29489	5.80974	0.250727	0.783523
bta-miR-30d	0.383018	13.8849	0.253412	0.786133
bta-miR-11972	-1.50638	4.1319	0.261046	0.803944
bta-miR-100	0.65296	10.4447	0.271941	0.831475
bta-miR-2361	-3.33946	1.77951	0.275834	0.83345
bta-miR-191	0.416667	12.3968	0.278402	0.83345
bta-miR-374a	1.61273	6.46169	0.27847	0.83345
bta-let-7g	0.607449	9.76484	0.284377	0.840051
bta-miR-2890	9.12081	2.94751	0.285579	0.840051
bta-miR-92b	-1.64474	5.00514	0.288289	0.840051
bta-miR-345-5p	9.23707	2.60077	0.288582	0.840051
bta-let-7f	0.392028	14.7307	0.290988	0.841292
bta-miR-186	0.582956	8.98417	0.296175	0.843851
bta-miR-660	0.938589	7.02536	0.296257	0.843851
bta-miR-449a	0.868537	7.72621	0.298999	0.843851
bta-miR-2285p	9.01624	2.72951	0.301273	0.843851
bta-miR-2285ba	-1.50759	3.05161	0.301801	0.843851
bta-miR-2285ce	0.481185	11.8579	0.311947	0.86135
bta-miR-423-3p	0.745198	7.36068	0.320487	0.86135
bta-miR-6528	-2.44569	1.9734	0.321017	0.86135
bta-miR-122	9.18675	2.99302	0.321228	0.86135
bta-miR-2336	-2.67703	2.70846	0.324972	0.86135
bta-miR-2285di	-1.2329	3.74258	0.325696	0.86135
bta-miR-2354	-2.65886	0.480979	0.326	0.86135
bta-miR-874	8.78758	2.62981	0.331626	0.86135
bta-miR-22-5p	9.03034	3.11407	0.332688	0.86135
bta-miR-2285l	8.5251	2.4253	0.335676	0.86135
bta-miR-99a-5p	0.5256	9.22692	0.336736	0.86135
bta-miR-10b	0.335963	13.8917	0.337023	0.86135
bta-miR-2285bl	8.88942	2.60753	0.33759	0.86135
bta-miR-181a	-0.783856	8.5473	0.338739	0.86135
bta-miR-2285x	8.50477	2.38924	0.339176	0.86135
bta-miR-28	-2.09802	2.83589	0.340487	0.86135
bta-miR-15b	-0.868005	8.13182	0.342789	0.862043
bta-miR-2285t	9.10012	2.88097	0.345037	0.862593
bta-miR-2285cs	0.447543	11.8444	0.348386	0.863379
bta-miR-2285cc	0.448632	11.8278	0.349479	0.863379
bta-miR-206	-2.33569	8.84795	0.354911	0.863379
bta-miR-378c	-2.58608	1.21154	0.362819	0.863379
bta-miR-2346	8.8721	2.93928	0.363858	0.863379
bta-miR-339a	0.432553	10.6377	0.364212	0.863379
bta-miR-1249	-1.9796	2.75273	0.364279	0.863379
bta-miR-15a	8.45212	3.23069	0.368085	0.863379
bta-miR-2285bc	8.26871	2.55963	0.369782	0.863379
bta-miR-99b	0.406821	10.4033	0.370141	0.863379
bta-miR-361	0.797269	9.09967	0.370256	0.863379
bta-miR-507b	8.65665	2.6192	0.371478	0.863379
bta-miR-9851	8.86823	2.5817	0.371761	0.863379
bta-miR-2285dg	8.25033	1.93128	0.375765	0.863505
bta-miR-149-5p	-2.32034	2.24229	0.376171	0.863505
bta-miR-11992	-3.06903	0.412896	0.37791	0.863505
bta-miR-11971	-2.52366	2.09033	0.382182	0.866223
bta-miR-2285aj-5p	0.518395	8.6806	0.383176	0.866223
bta-miR-2285cl	8.555	2.75131	0.387245	0.867798
bta-miR-29a	0.363899	10.9604	0.388717	0.867798
bta-miR-2448-3p	8.56644	2.49502	0.390354	0.867798
bta-miR-2285ao	8.388	1.72556	0.399041	0.867798
bta-miR-2285j	0.404439	11.7349	0.400295	0.867798
bta-miR-26b	0.329514	12.979	0.400566	0.867798
bta-miR-34c	0.657413	7.75203	0.402001	0.867798
bta-miR-33a	8.61071	2.61051	0.403561	0.867798
bta-miR-2285ad	8.25372	1.92331	0.40443	0.867798
bta-miR-107	-1.02458	7.97992	0.405281	0.867798
bta-miR-27a-3p	-1.15712	8.59715	0.415428	0.867798
bta-miR-126-5p	8.21836	3.11305	0.41753	0.867798
bta-miR-1296	-1.1142	4.54974	0.418971	0.867798
bta-miR-423-5p	0.541066	10.8236	0.420593	0.867798
bta-miR-365-3p	8.26899	2.09384	0.424602	0.867798
bta-miR-425-5p	1.35606	4.42655	0.428766	0.867798
bta-miR-2285by	0.559663	7.68648	0.43078	0.867798
bta-miR-103	0.347389	11.7248	0.431118	0.867798
bta-miR-2285q	8.19064	2.09656	0.43161	0.867798
bta-miR-152	0.488172	8.40438	0.435811	0.867798
bta-miR-22-3p	0.795421	6.21964	0.442896	0.867798
bta-miR-192	0.782324	6.55644	0.443293	0.867798
bta-miR-148d	0.780081	6.08845	0.44867	0.867798
bta-miR-148b	0.408721	9.30881	0.449851	0.867798
bta-miR-744	0.812812	5.82981	0.450468	0.867798
bta-miR-30e-5p	0.3975	10.8607	0.451813	0.867798
bta-miR-191b	7.90446	1.2786	0.458	0.867798
bta-miR-2285i	7.81105	1.2753	0.459656	0.867798
bta-miR-2285cf	7.82507	1.32536	0.46015	0.867798
bta-miR-30a-5p	0.278114	11.9875	0.463599	0.867798
bta-miR-6119-5p	-0.880264	5.16878	0.464468	0.867798
bta-miR-3432a	0.370649	10.0833	0.466192	0.867798
bta-miR-2285bn	0.530802	7.12429	0.46722	0.867798
bta-miR-6523a	8.17696	2.13686	0.470057	0.867798
bta-miR-106b	7.92557	2.68122	0.473266	0.867798
bta-miR-2285b	7.73438	2.50848	0.473897	0.867798
bta-miR-502a	1.34899	4.52673	0.475739	0.867798
bta-miR-375	1.04712	5.37263	0.478325	0.867798
bta-miR-187	-1.94994	1.54934	0.478387	0.867798
bta-miR-1839	0.603284	6.75182	0.480408	0.867798
bta-miR-664b	7.92433	2.44623	0.480516	0.867798
bta-miR-200c	0.256328	14.7403	0.482873	0.867798
bta-miR-877	7.75308	1.58057	0.483438	0.867798
bta-miR-2285be	0.653662	6.34544	0.48397	0.867798
bta-miR-3431	0.498651	9.05562	0.485494	0.867798
bta-miR-1343-5p	-1.30972	3.93047	0.494908	0.867798
bta-miR-2483-5p	7.7758	2.10364	0.495445	0.867798
bta-miR-24-3p	-0.630744	7.01398	0.496343	0.867798
bta-miR-98	-0.488517	9.59635	0.498262	0.867798
bta-miR-2419-5p	-0.702673	5.58218	0.499528	0.867798
bta-miR-200b	0.294344	12.2934	0.502223	0.867798
bta-let-7a-3p	-1.65637	2.94868	0.502528	0.867798
bta-miR-139	7.65766	1.04929	0.506584	0.867798
bta-miR-199a-3p	7.85976	1.77494	0.508737	0.867798
bta-miR-3604	7.85976	1.77494	0.508791	0.867798
bta-miR-11993	7.76882	1.74658	0.509008	0.867798
bta-miR-454	7.71401	2.20696	0.510499	0.867798
bta-miR-2285bb	7.47552	1.47176	0.510971	0.867798
bta-miR-155	0.851244	5.07368	0.51407	0.867798
bta-miR-21-5p	-0.302231	13.7808	0.514377	0.867798
bta-miR-19b	0.714092	6.89294	0.514559	0.867798
bta-miR-1298	0.37546	8.78011	0.515789	0.867798
bta-miR-16b	-0.509854	8.7853	0.519102	0.867798
bta-miR-223	7.36397	7.71737	0.522367	0.867798
bta-miR-27a-5p	7.58461	1.21681	0.523514	0.867798
bta-miR-218	-1.22264	3.74871	0.526839	0.867798
bta-miR-324	-1.0369	4.00004	0.537645	0.867798
bta-miR-2285cj	7.36728	0.838177	0.538602	0.867798
bta-miR-2284d	0.423594	7.9469	0.538671	0.867798
bta-miR-2285db	7.14797	0.697697	0.544634	0.867798
bta-miR-153	7.41149	1.68785	0.545557	0.867798
bta-miR-2285dl-3p	7.09174	2.39029	0.548709	0.867798
bta-miR-671	-1.48058	1.43983	0.552647	0.867798
bta-miR-2285bq	7.11452	1.0425	0.552804	0.867798
bta-miR-129-5p	7.49583	1.0749	0.554726	0.867798
bta-miR-129	7.49583	1.0749	0.554863	0.867798
bta-miR-2285bz	7.22132	0.908336	0.556008	0.867798
bta-miR-211	6.98963	1.3953	0.556607	0.867798
bta-miR-30f	0.357421	8.05483	0.56111	0.867798
bta-miR-2285av	6.99191	1.67425	0.565774	0.867798
bta-miR-215	7.35062	0.971588	0.566339	0.867798
bta-miR-6522	7.33796	2.29768	0.570605	0.867798
bta-miR-2411-5p	7.21067	0.983175	0.578101	0.867798
bta-miR-2284r	-1.60574	1.42188	0.579578	0.867798
bta-miR-2285bh	6.9229	1.75875	0.580657	0.867798
bta-miR-2285ae	6.78703	0.593365	0.582125	0.867798
bta-miR-151-3p	0.333847	10.3876	0.587205	0.867798
bta-miR-2431-3p	6.96379	2.55312	0.587359	0.867798
bta-miR-6526	0.659887	5.28944	0.591468	0.867798
bta-miR-29d-3p	-0.780848	3.88784	0.594205	0.867798
bta-miR-2285ct	-1.73779	2.08246	0.59433	0.867798
bta-miR-27b	-0.372725	9.60466	0.600812	0.867798
bta-miR-628	-1.46562	2.44101	0.600951	0.867798
bta-miR-12034	6.77494	0.398803	0.603697	0.867798
bta-miR-2285u	6.73648	0.339188	0.60592	0.867798
bta-miR-10182-5p	6.95531	0.54276	0.606678	0.867798
bta-miR-301a	6.92571	1.15528	0.607218	0.867798
bta-miR-2285ap	6.90631	0.460131	0.609656	0.867798
bta-miR-2285ar	6.90298	0.45	0.611008	0.867798
bta-miR-194	0.540646	5.80762	0.612207	0.867798
bta-miR-2285bi	6.88697	0.437467	0.612409	0.867798
bta-miR-296-3p	-1.06345	3.33258	0.612779	0.867798
bta-miR-185	0.432263	6.27577	0.613168	0.867798
bta-miR-499	6.72116	1.78617	0.614295	0.867798
bta-miR-2285dc	6.55004	1.14986	0.618979	0.867798
bta-miR-2285cp	6.54007	1.19728	0.622064	0.867798
bta-miR-2285cr	6.43999	0.521786	0.623416	0.867798
bta-miR-455-3p	6.66285	0.242027	0.625688	0.867798
bta-miR-2285co	6.46364	0.168492	0.628642	0.867798
bta-miR-127	6.69495	0.321059	0.628667	0.867798
bta-miR-1306	0.515678	5.84008	0.631391	0.867798
bta-miR-181d	6.56536	0.232269	0.633265	0.867798
bta-miR-193a-5p	0.657032	5.0401	0.633943	0.867798
bta-miR-135a	-0.29061	10.1563	0.635491	0.867798
bta-miR-2284m	6.32931	0.781473	0.636532	0.867798
bta-miR-2285bu	6.35805	1.64261	0.636603	0.867798
bta-miR-7857-5p	6.65438	0.593514	0.637782	0.867798
bta-miR-34b	6.38592	1.51669	0.638661	0.867798
bta-miR-2467-3p	6.46004	7.30626	0.642828	0.867798
bta-miR-362-5p	0.793374	4.84593	0.644324	0.867798
bta-miR-132	-1.13722	3.05988	0.644432	0.867798
bta-miR-2411-3p	6.70885	0.96728	0.645025	0.867798
bta-miR-101	-0.400214	6.71507	0.646386	0.867798
bta-miR-338	-1.19681	2.72891	0.648676	0.867798
bta-miR-3065	-1.19684	2.72891	0.648722	0.867798
bta-miR-183	0.231497	11.3042	0.651481	0.867798
bta-miR-96	-0.547933	5.86315	0.654708	0.867798
bta-miR-328	-0.378272	6.1643	0.655	0.867798
bta-miR-2285c	6.27272	0.112961	0.655281	0.867798
bta-miR-1264	-1.19704	2.07022	0.655654	0.867798
bta-miR-2285e	6.30438	2.36384	0.659974	0.867798
bta-let-7i	0.264349	11.4455	0.660661	0.867798
bta-miR-200a	0.15021	15.048	0.662187	0.867798
bta-miR-6119-3p	-1.00876	3.29599	0.665393	0.867798
bta-miR-29c	0.180215	12.1853	0.665415	0.867798
bta-let-7d	-0.277308	7.83111	0.665508	0.867798
bta-miR-340	6.22358	1.70586	0.665541	0.867798
bta-miR-2284k	0.313195	7.09881	0.665652	0.867798
bta-miR-2431-5p	6.39464	0.626787	0.673729	0.873234
bta-miR-2285ca	6.07157	1.49255	0.673932	0.873234
bta-miR-217	6.21906	0.93779	0.679581	0.876147
bta-miR-507-3p	6.30271	1.24359	0.68086	0.876147
bta-miR-3432b	5.89904	0.128738	0.682364	0.876147
bta-miR-339b	0.396147	7.39767	0.689424	0.882545
bta-miR-2284h-5p	5.80378	0.673092	0.695512	0.887666
bta-miR-99a-3p	5.88426	0.666715	0.703811	0.889154
bta-miR-6120-3p	0.737911	4.441	0.703991	0.889154
bta-miR-411a	5.86494	1.44303	0.707008	0.889154
bta-miR-2285cd	-0.473383	4.06739	0.711339	0.889154
bta-miR-10172-3p	5.81218	0.162239	0.71598	0.889154
bta-miR-449b	5.57052	-0.219607	0.717358	0.889154
bta-miR-545-5p	5.69548	0.13821	0.719679	0.889154
bta-miR-148c	0.22885	7.90513	0.719972	0.889154
bta-miR-326	5.61123	0.173974	0.721978	0.889154
bta-miR-30b-5p	0.235566	7.74208	0.723243	0.889154
bta-miR-11985	5.58279	1.15135	0.724157	0.889154
bta-miR-2348	5.59949	6.89896	0.724239	0.889154
bta-miR-429	-0.196629	11.5202	0.727152	0.889154
bta-miR-2312	5.42357	-0.513769	0.733923	0.889154
bta-miR-2284j	5.42369	-0.513769	0.733941	0.889154
bta-miR-31	-0.89854	2.10198	0.733992	0.889154
bta-miR-2285cm	-0.463464	3.80129	0.734153	0.889154
bta-miR-2284c	5.49778	0.311093	0.736122	0.889154
bta-miR-30c	0.295108	7.62687	0.739515	0.889154
bta-miR-2284v	5.49564	-0.104122	0.740511	0.889154
bta-miR-190b	5.47307	0.0823902	0.742966	0.889154
bta-miR-2285ac	5.25945	-0.341407	0.743312	0.889154
bta-miR-2285as	5.24174	-0.0453503	0.746036	0.889154
bta-miR-497	5.39182	1.28958	0.748304	0.889154
bta-miR-2285aw	5.17082	-0.135395	0.751055	0.889154
bta-miR-20a	0.338207	6.81199	0.751776	0.889154
bta-miR-11995	5.29883	0.599751	0.753166	0.889154
bta-miR-7180	5.33214	1.26648	0.755787	0.889777
bta-miR-2428	5.11337	6.75335	0.764174	0.895833
bta-miR-2436-3p	5.02942	6.1292	0.766505	0.895833
bta-miR-137	5.18552	0.564323	0.768542	0.895833
bta-miR-1468	0.286222	5.80327	0.770643	0.895833
bta-miR-135b	4.86671	0.320179	0.775856	0.895833
bta-miR-2887	4.96264	0.610191	0.777481	0.895833
bta-miR-6123	0.582791	3.9396	0.777526	0.895833
bta-miR-760-3p	-0.776057	2.69408	0.777794	0.895833
bta-miR-2285cw	4.88074	0.229798	0.783767	0.899682
bta-miR-2483-3p	-0.584544	3.39923	0.78537	0.899682
bta-miR-2284ab	-0.584915	3.37353	0.790068	0.902632
bta-miR-202	4.71851	0.357026	0.794156	0.904022
bta-miR-335	0.369151	5.74351	0.796588	0.904022
bta-miR-146a	-0.179455	8.00229	0.797666	0.904022
bta-miR-12059	4.45179	-0.603487	0.81161	0.917379
bta-miR-210	0.286759	5.78706	0.81759	0.921687
bta-miR-141	-0.110355	12.0886	0.821166	0.921769
bta-miR-500	-0.549704	2.52401	0.824141	0.921769
bta-miR-25	-0.106127	10.0444	0.82417	0.921769
bta-miR-2888	4.06924	-0.414843	0.832537	0.92417
bta-miR-2285aa	-0.417332	2.42164	0.832553	0.92417
bta-miR-29e	-0.421997	3.36023	0.83284	0.92417
bta-miR-148a	0.0752679	14.5468	0.835491	0.924697
bta-miR-652	0.452334	3.91297	0.839503	0.926724
bta-miR-2284o	3.89567	-0.274285	0.843163	0.928109
bta-miR-935	3.86243	1.26886	0.845125	0.928109
bta-miR-6775	3.716	-0.39547	0.854504	0.93599
bta-miR-1247-3p	-0.617133	2.25718	0.858147	0.937109
bta-miR-11986b	0.272774	5.31845	0.861575	0.937109
bta-miR-196b	0.113718	8.10876	0.863397	0.937109
bta-miR-342	0.0712436	11.6145	0.864345	0.937109
bta-miR-140	-0.120482	6.84832	0.872505	0.943549
bta-miR-10175-3p	3.16264	6.63297	0.879479	0.948677
bta-miR-1291	3.07279	4.1655	0.884013	0.951154
bta-miR-29b	0.0999591	9.55204	0.891668	0.955949
bta-miR-484	0.291303	3.76711	0.893846	0.955949
bta-miR-128	0.106022	6.78042	0.895218	0.955949
bta-miR-221	0.0554013	10.2119	0.910457	0.969785
bta-miR-224	0.0704426	7.73497	0.91955	0.973895
bta-miR-331-3p	0.122811	5.00466	0.919816	0.973895
bta-miR-374b	0.153048	4.69417	0.923013	0.973895
bta-miR-26c	0.0346989	12.8629	0.925496	0.973895
bta-miR-92a	-0.0583314	8.87143	0.928445	0.973895
bta-miR-150	0.200227	3.50936	0.930723	0.973895
bta-miR-17-5p	0.129624	5.20367	0.933043	0.973895
bta-miR-6518	0.189909	3.07448	0.935427	0.973895
bta-miR-2442	1.64858	-0.4575	0.936594	0.973895
bta-miR-378	0.162422	3.49939	0.937798	0.973895
bta-miR-425-3p	0.173633	3.21179	0.939522	0.973895
bta-miR-19a	0.151861	3.89019	0.941934	0.97402
bta-miR-95	-0.0623405	6.72278	0.950895	0.979818
bta-miR-2285dd	0.0384524	9.72001	0.952152	0.979818
bta-miR-12019	1.45599	-0.636952	0.955504	0.980891
bta-miR-2364	0.824595	0.930128	0.963949	0.987177
bta-miR-2373-5p	0.591328	0.980711	0.969309	0.990279
bta-miR-16a	0.0107224	12.529	0.978397	0.997167
bta-miR-2285da	0.0146087	9.76011	0.981846	0.998288
bta-miR-532	0.0115708	6.63699	0.989544	1
bta-miR-7859	-0.0314576	3.17631	0.989694	1
bta-miR-1911	-0.00510147	6.5325	0.995021	1
bta-miR-504	-0.00644994	5.77922	0.995471	1
bta-miR-151-5p	0.00202892	6.70982	0.998021	1
bta-miR-760-5p	0	0.968752	1	1
bta-miR-12055	0	-0.0916501	1	1

## Sheet: SPvsSPE UF
	logFC	logCPM	PValue	FDR
bta-miR-2478	-4.31541	16.6951	8.01038e-11	3.40441e-08
bta-let-7b	0.965934	17.2925	1.10862e-06	0.000163839
bta-miR-3596	0.965934	17.2925	1.15651e-06	0.000163839
bta-miR-11980	-2.78297	14.9735	7.76315e-06	0.000824834
bta-miR-2358	-6.04801	8.23384	0.00047213	0.0401311
bta-miR-125b	0.857773	14.9915	0.000724087	0.046605
bta-miR-146a	-2.23268	8.00281	0.000784982	0.046605
bta-miR-217	-7.81625	0.932094	0.000877271	0.046605
bta-miR-153	-8.88976	1.6945	0.00132598	0.0626157
bta-miR-2431-3p	-8.54649	2.57436	0.00296019	0.111984
bta-miR-301a	-8.15096	1.17493	0.0031641	0.111984
bta-miR-199a-3p	-7.86616	1.77903	0.00366762	0.111984
bta-miR-181d	-7.81739	0.25358	0.00372947	0.111984
bta-miR-3604	-7.86606	1.77903	0.00376548	0.111984
bta-miR-2348	-7.21536	6.8549	0.00395237	0.111984
bta-miR-2898	-1.27736	16.1597	0.00476824	0.120546
bta-miR-21-5p	-1.35211	13.7808	0.00486179	0.120546
bta-miR-2447	-5.4473	4.5495	0.0051055	0.120546
bta-miR-18b	-5.85046	3.43459	0.00565132	0.12279
bta-miR-149-3p	-8.20106	3.29108	0.00577836	0.12279
bta-miR-2285ah-5p	6.89252	6.9855	0.00665152	0.134614
bta-miR-11987	-1.79624	12.0153	0.00745811	0.137929
bta-miR-1584-5p	-6.98221	-0.23617	0.00746441	0.137929
bta-miR-12057	6.3572	7.37542	0.0087713	0.149902
bta-miR-628	-8.08449	2.44131	0.00905992	0.149902
bta-miR-11978	-6.04552	4.44957	0.00953856	0.149902
bta-miR-2285e	-6.90312	2.38548	0.00966326	0.149902
bta-miR-11986c	-6.46339	3.21549	0.0103887	0.149902
bta-miR-2467-3p	-6.52926	7.27328	0.0105327	0.149902
bta-miR-2284r	-6.32665	1.37641	0.0105813	0.149902
bta-miR-11988	-6.54649	6.71597	0.01307	0.175199
bta-miR-125a	0.9623	12.9854	0.0131914	0.175199
bta-miR-1284	-7.16479	0.954245	0.0183883	0.236619
bta-miR-130b	-7.79758	1.56935	0.0192116	0.236619
bta-miR-143	-5.64736	3.78895	0.0194863	0.236619
bta-miR-2409	6.1576	5.68053	0.0206393	0.243659
bta-miR-3613b	7.00733	0.516677	0.0254376	0.292188
bta-miR-1247-5p	-4.76933	-0.894259	0.0279158	0.308561
bta-miR-2382-3p	-6.2802	2.34315	0.028315	0.308561
bta-miR-7865	-3.96222	1.05128	0.0291357	0.309567
bta-miR-204	-1.33454	8.25243	0.0321333	0.331573
bta-miR-10172-3p	-6.38112	0.185201	0.0327672	0.331573
bta-miR-6526	-2.18175	5.29673	0.0360346	0.354692
bta-miR-497	-6.99	1.29193	0.03726	0.354692
bta-miR-2284v	-6.19649	-0.103636	0.037901	0.354692
bta-miR-10182-5p	7.72331	0.56204	0.0384297	0.354692
bta-miR-12034	-4.515	0.417097	0.0403298	0.354692
bta-miR-1247-3p	-9.55493	2.22172	0.0405845	0.354692
bta-miR-2284c	-6.19505	0.288198	0.0408939	0.354692
bta-miR-2285ad	-3.85282	1.94002	0.0442019	0.363571
bta-miR-6522	-5.5888	2.3154	0.0449064	0.363571
bta-miR-2285ct	7.68512	2.06986	0.0450132	0.363571
bta-miR-507-3p	-6.99268	1.25437	0.0453395	0.363571
bta-miR-2361	-6.03072	1.75821	0.050321	0.396045
bta-miR-449a	-1.58042	7.73062	0.0530226	0.400107
bta-miR-11997	-3.19938	4.33522	0.0532505	0.400107
bta-miR-12036	-3.34738	-0.746241	0.054117	0.400107
bta-miR-545-5p	-5.17864	0.153582	0.0546029	0.400107
bta-miR-2442	-2.7412	-0.649312	0.0561888	0.40475
bta-miR-2428	-5.55608	6.66954	0.0603109	0.422225
bta-miR-105a	-3.87141	3.22459	0.0609591	0.422225
bta-miR-2305	-3.33368	1.50237	0.0625747	0.422225
bta-miR-3432a	0.955207	10.0839	0.0628577	0.422225
bta-miR-127	6.07455	0.338485	0.063582	0.422225
bta-miR-29e	3.20249	3.34116	0.0655795	0.427341
bta-miR-2285av	-3.37063	1.68402	0.0678856	0.427341
bta-miR-342	0.80721	11.6148	0.0684759	0.427341
bta-miR-2285dc	2.9005	1.12315	0.0685242	0.427341
bta-miR-11996	-4.72429	-1.03687	0.0703216	0.427341
bta-miR-2285bb	-3.98569	1.46985	0.0703856	0.427341
bta-miR-2887	-5.21102	0.243423	0.0729072	0.436416
bta-miR-7180	-6.00368	1.26966	0.0783078	0.462234
bta-miR-29c	0.722005	12.1854	0.0802395	0.467148
bta-miR-99a-3p	-5.37699	0.648713	0.0838756	0.481718
bta-miR-6527	-5.86189	2.37007	0.087971	0.498502
bta-miR-12059	-5.07833	-0.639461	0.0896052	0.498572
bta-miR-11985	-4.96885	1.13897	0.0903295	0.498572
bta-miR-2285ca	-4.12524	1.51035	0.0924167	0.503553
bta-miR-100	-1.06477	10.4447	0.0959898	0.508222
bta-miR-34b	-3.47078	1.53759	0.0961117	0.508222
bta-miR-423-5p	1.24204	10.8228	0.0968612	0.508222
bta-miR-6517	-4.1789	2.72298	0.0989495	0.511186
bta-let-7c	0.663484	14.3257	0.0998317	0.511186
bta-miR-2455	-3.3956	1.92983	0.103057	0.516823
bta-miR-12019	-3.44282	-0.902486	0.103365	0.516823
bta-miR-2285by	-1.15878	7.69006	0.107055	0.529052
bta-miR-202	-3.5971	0.338046	0.109178	0.533343
bta-miR-6528	5.11739	1.93788	0.111812	0.536182
bta-miR-335	-2.21021	5.75447	0.112283	0.536182
bta-miR-10185-5p	-2.06434	1.09158	0.115615	0.545959
bta-let-7e	0.657816	11.3173	0.122284	0.571106
bta-miR-2410	-5.50181	2.12247	0.126571	0.584702
bta-miR-320a	0.865327	11.3068	0.128048	0.585164
bta-miR-34c	-1.25448	7.75461	0.130315	0.589189
bta-miR-935	-2.76507	0.821966	0.134358	0.601076
bta-miR-6529a	1.14929	6.88925	0.14546	0.643964
bta-miR-194b-3p	-3.81751	0.757407	0.14825	0.64955
bta-miR-346	4.33528	0.492262	0.152115	0.658023
bta-miR-2285co	-2.56176	0.19256	0.153473	0.658023
bta-miR-2285bz	-3.35047	0.922394	0.154829	0.658023
bta-miR-2284h-5p	-2.42924	0.64632	0.16068	0.67613
bta-miR-29a	0.61249	10.9608	0.164298	0.677642
bta-miR-2312	-3.26623	-0.506934	0.165266	0.677642
bta-miR-2284j	-3.26688	-0.506934	0.166405	0.677642
bta-miR-200b	-0.646774	12.2936	0.167872	0.677642
bta-miR-20a	-1.52457	6.82015	0.169418	0.677642
bta-miR-2285ae	1.97238	0.604306	0.170606	0.677642
bta-miR-669	0.897401	8.43731	0.174897	0.681941
bta-miR-2284aa	-1.786	3.95942	0.175635	0.681941
bta-miR-2285y	-1.78598	3.95942	0.176502	0.681941
bta-miR-2285x	1.74917	2.40921	0.182772	0.699802
bta-miR-6119-5p	-1.63109	5.16279	0.186067	0.706058
bta-miR-2436-3p	2.0708	6.05349	0.19346	0.727614
bta-miR-2436-5p	-2.71077	1.89899	0.204442	0.762174
bta-miR-185	0.94626	6.28223	0.216575	0.788806
bta-miR-1777a	-2.00954	7.12502	0.217466	0.788806
bta-miR-16b	-1.15315	8.78077	0.220439	0.788806
bta-miR-328	0.973962	6.16604	0.221258	0.788806
bta-miR-769	1.58827	8.87684	0.221278	0.788806
bta-miR-671	3.27859	1.42808	0.222722	0.788806
bta-miR-2284d	0.874325	7.948	0.234338	0.820641
bta-miR-1291	-1.3238	3.7267	0.237112	0.820641
bta-miR-2325c	-1.98518	7.16892	0.239696	0.820641
bta-miR-99b	0.561631	10.4038	0.241985	0.820641
bta-miR-30c	-1.1087	7.62863	0.242428	0.820641
bta-miR-365-5p	-1.319	-0.265812	0.243296	0.820641
bta-miR-200a	-0.429389	15.048	0.24901	0.833302
bta-miR-2284z	-0.767107	8.89305	0.251026	0.833485
bta-miR-2285bv	-0.753483	8.75251	0.265745	0.859757
bta-miR-2340	-1.62297	8.99787	0.266544	0.859757
bta-miR-181b	-1.74266	7.27224	0.26687	0.859757
bta-miR-10175-3p	-1.36465	6.582	0.267664	0.859757
bta-miR-4286	-1.36294	-0.656106	0.2708	0.859757
bta-miR-374b	-1.09804	4.70229	0.272462	0.859757
bta-miR-2285cq	-0.912556	6.60013	0.273099	0.859757
bta-miR-2284n	-0.735738	8.73923	0.276521	0.864128
bta-miR-93	-0.689311	8.02171	0.279411	0.866785
bta-miR-744	0.934276	5.83159	0.281495	0.866924
bta-miR-2483-3p	-2.69639	3.39714	0.284801	0.870793
bta-miR-190b	-1.27987	0.103313	0.297442	0.902948
bta-miR-2285bf	-0.78463	6.94814	0.304431	0.917611
bta-miR-30a-5p	0.415453	11.9877	0.307554	0.920497
bta-miR-2443	1.51973	3.78423	0.310228	0.922006
bta-miR-126-5p	-1.96058	3.12191	0.31779	0.937922
bta-let-7d	0.671258	7.83341	0.320204	0.938529
bta-miR-2354	2.46176	0.468437	0.326136	0.947217
bta-miR-11989	2.32206	1.28397	0.327626	0.947217
bta-miR-1260b	-1.19298	9.77782	0.333185	0.956781
bta-miR-135a	-0.627415	10.1571	0.337542	0.962786
bta-miR-200c	0.348147	14.7403	0.341976	0.968932
bta-miR-10b	-0.370522	13.8917	0.346074	0.974049
bta-miR-148b	0.549706	9.30932	0.349995	0.978605
bta-miR-223	2.14077	7.69625	0.35748	0.982506
bta-miR-12058	2.022	9.43621	0.358008	0.982506
bta-miR-187	2.28609	1.53608	0.358326	0.982506
bta-miR-483	-2.70035	3.95749	0.362638	0.982647
bta-miR-205	0.428175	11.7805	0.364078	0.982647
bta-miR-191	-0.378728	12.3969	0.365314	0.982647
bta-miR-2285dl-3p	1.48394	2.41296	0.370574	0.990529
bta-miR-2284w	-1.49518	4.33484	0.373592	0.992354
bta-miR-2373-5p	1.19732	0.91029	0.377806	0.997314
bta-miR-2483-5p	-2.12754	2.11996	0.383616	1
bta-miR-7859	1.50779	3.15555	0.384847	1
bta-miR-1298	0.520716	8.78229	0.390249	1
bta-miR-1911	0.638616	6.53597	0.399781	1
bta-miR-2285bq	-1.67417	1.0471	0.400275	1
bta-miR-194b	-2.83583	1.04418	0.402374	1
bta-miR-15a	-1.61904	3.25504	0.406965	1
bta-miR-99a-5p	-0.461055	9.22834	0.40903	1
bta-miR-22-5p	-2.24062	3.13946	0.412523	1
bta-miR-10179-5p	1.78596	3.2658	0.416456	1
bta-miR-491	1.51278	3.92495	0.418361	1
bta-miR-2285ac	0.948424	-0.33112	0.418607	1
bta-miR-12030	1.24496	2.94161	0.421677	1
bta-miR-11984	1.91153	1.31081	0.428177	1
bta-miR-146b	-1.28157	5.17543	0.430687	1
bta-miR-3613a	1.8206	2.65313	0.433208	1
bta-miR-6120-3p	-1.20161	4.44797	0.433351	1
bta-miR-452	0.518578	8.35807	0.435497	1
bta-miR-345-5p	-1.38037	2.6218	0.436808	1
bta-miR-101	0.631378	6.71736	0.44241	1
bta-miR-449b	-1.26557	-0.203941	0.449197	1
bta-miR-211	-0.99975	1.40693	0.449352	1
bta-let-7f	-0.324841	14.7307	0.450339	1
bta-miR-502a	1.19597	4.54131	0.453098	1
bta-miR-30b-5p	-0.48657	7.74455	0.457694	1
bta-miR-26b	-0.318228	12.979	0.467152	1
bta-miR-2388-3p	0.589617	9.79876	0.468031	1
bta-miR-2285b	-1.52777	2.48631	0.46943	1
bta-miR-2888	-1.66925	-0.447056	0.472	1
bta-miR-140	-0.546484	6.85014	0.480166	1
bta-miR-2285cp	1.46079	1.19157	0.485049	1
bta-miR-132	-1.76411	3.06659	0.487913	1
bta-miR-2285cj	1.90269	0.855822	0.490721	1
bta-miR-296-3p	1.3206	3.28325	0.491028	1
bta-miR-1	-0.532658	12.8175	0.492146	1
bta-miR-484	-1.4311	3.78333	0.49256	1
bta-miR-429	-0.438763	11.5199	0.496818	1
bta-miR-361	0.628204	9.09071	0.497036	1
bta-miR-7857-5p	-2.43844	0.605396	0.498427	1
bta-miR-26c	-0.277547	12.863	0.498523	1
bta-miR-2304	2.0385	2.3688	0.501862	1
bta-miR-33a	-1.87431	2.62786	0.504853	1
bta-miR-652	-1.42777	3.9289	0.504904	1
bta-miR-9851	1.49413	2.60542	0.505402	1
bta-miR-3431	0.516103	9.05453	0.512845	1
bta-miR-877	1.50328	1.59309	0.513859	1
bta-miR-2284x	-0.659311	6.98914	0.514692	1
bta-miR-2889	-0.998214	10.2854	0.515642	1
bta-miR-6123	0.866809	3.95495	0.516235	1
bta-miR-25	0.350715	10.0449	0.516409	1
bta-miR-378	1.03913	3.50918	0.517729	1
bta-miR-2285q	1.38066	2.09829	0.524171	1
bta-miR-194	-0.498737	5.82075	0.528633	1
bta-miR-129	-2.12682	1.09503	0.530426	1
bta-miR-129-5p	-2.12675	1.09503	0.530848	1
bta-miR-31	-1.46913	2.06607	0.533787	1
bta-miR-22-3p	0.487324	6.22541	0.535776	1
bta-miR-2284y	-1.02317	3.39611	0.536023	1
bta-miR-23a	0.295977	11.8164	0.536999	1
bta-miR-532	-0.579181	6.63895	0.538094	1
bta-miR-19b	-0.675792	6.89862	0.540853	1
bta-miR-221	-0.348585	10.212	0.541478	1
bta-miR-30d	0.233186	13.8849	0.542424	1
bta-miR-423-3p	0.436275	7.36646	0.547184	1
bta-miR-30e-5p	-0.355167	10.8608	0.550053	1
bta-miR-184	-0.798728	9.59288	0.552358	1
bta-miR-181a	-0.578988	8.53602	0.561805	1
bta-miR-1246	-0.495192	10.1604	0.562689	1
bta-miR-1306	0.496921	5.84323	0.569182	1
bta-miR-11975	0.824123	5.85193	0.57199	1
bta-miR-151-3p	0.399058	10.3866	0.576542	1
bta-miR-324	-0.911648	3.9803	0.579753	1
bta-miR-3432b	-0.604265	0.140574	0.582422	1
bta-miR-2284ab	0.845248	3.36481	0.589259	1
bta-miR-11992	1.82258	0.398885	0.596228	1
bta-miR-2285cd	0.460145	4.04364	0.598164	1
bta-miR-191b	-1.20247	1.29034	0.601234	1
bta-miR-10a	-0.167951	14.842	0.601797	1
bta-miR-193a-5p	0.60243	5.05037	0.604559	1
bta-miR-215	-1.43329	0.960905	0.605925	1
bta-miR-186	-0.294685	8.98598	0.607241	1
bta-miR-2346	1.50553	2.95044	0.609108	1
bta-miR-500	1.0316	2.52394	0.614501	1
bta-miR-1264	1.34077	2.06599	0.616936	1
bta-miR-1777b	-1.00415	0.49961	0.621239	1
bta-miR-9-5p	0.529759	6.80215	0.622871	1
bta-miR-28	-1.22106	2.79168	0.623704	1
bta-miR-2892	-0.619288	5.42619	0.626082	1
bta-miR-6518	0.737951	3.08489	0.652982	1
bta-miR-2285al-5p	-0.511326	3.11062	0.653409	1
bta-miR-454	1.30056	2.2086	0.653445	1
bta-miR-2285c	1.20052	0.133454	0.660531	1
bta-miR-106b	1.143	2.70231	0.660835	1
bta-miR-190a	0.714689	4.3028	0.66432	1
bta-miR-11982	-1.2894	4.0883	0.668744	1
bta-miR-760-3p	-0.980894	2.64919	0.671483	1
bta-miR-135b	-0.505146	0.279367	0.677009	1
bta-miR-192	-0.416247	6.56345	0.679001	1
bta-miR-2285t	-1.10868	2.90351	0.680633	1
bta-miR-3065	1.11951	2.73215	0.682731	1
bta-miR-338	1.11973	2.73215	0.683249	1
bta-miR-11993	1.3979	1.76654	0.683703	1
bta-miR-11972	-0.555097	4.10965	0.684021	1
bta-miR-95	-0.425223	6.72987	0.685447	1
bta-miR-2431-5p	1.47704	0.615455	0.686885	1
bta-miR-152	0.259755	8.40656	0.68798	1
bta-miR-326	1.09875	0.0592555	0.693017	1
bta-miR-660	0.360248	7.02946	0.693622	1
bta-miR-2285j	-0.212619	11.7347	0.695495	1
bta-miR-149-5p	1.03374	2.23545	0.695698	1
bta-miR-197	-0.321562	5.79749	0.697594	1
bta-miR-6523a	1.25019	2.12935	0.700053	1
bta-miR-34a	0.544981	4.68306	0.701031	1
bta-miR-375	-0.472028	5.38574	0.703553	1
bta-miR-2285be	-0.321579	6.3527	0.705326	1
bta-miR-507b	-0.894464	2.61664	0.70647	1
bta-miR-2285aw	-0.451404	-0.123477	0.713349	1
bta-miR-340	1.04706	1.72588	0.72476	1
bta-miR-30f	-0.23292	8.05722	0.725932	1
bta-miR-2336	-1.08053	2.70439	0.726253	1
bta-miR-1307	0.633353	7.73163	0.727139	1
bta-miR-2285ce	-0.186316	11.8577	0.727529	1
bta-let-7i	-0.244617	11.4454	0.730445	1
bta-miR-2285cc	-0.185212	11.8277	0.73233	1
bta-miR-2285cs	-0.182846	11.8442	0.734063	1
bta-miR-196a	0.374365	8.15427	0.734999	1
bta-miR-98	-0.295643	9.59271	0.739124	1
bta-miR-206	-0.801886	8.83825	0.743583	1
bta-miR-130a	0.784856	4.12151	0.747496	1
bta-miR-183	0.183304	11.3039	0.751723	1
bta-miR-32	-0.537375	5.22322	0.752832	1
bta-miR-155	0.32501	5.08445	0.755199	1
bta-miR-6119-3p	-0.718965	3.26921	0.757326	1
bta-miR-421	-0.349681	5.19287	0.763007	1
bta-miR-11971	1.03177	2.05269	0.766207	1
bta-miR-339a	0.148843	10.638	0.771481	1
bta-miR-2285i	0.583256	1.29571	0.77221	1
bta-miR-103	0.14519	11.7249	0.774439	1
bta-miR-2285at	-0.304564	5.4129	0.774987	1
bta-miR-411a	-1.04829	1.43894	0.776121	1
bta-miR-224	0.210509	7.73807	0.776269	1
bta-miR-1249	-0.62787	2.68181	0.776593	1
bta-miR-148d	-0.222913	6.0955	0.776623	1
bta-miR-16a	-0.128269	12.5289	0.776954	1
bta-miR-2285dg	-0.350738	1.9497	0.782033	1
bta-miR-2285bl	-0.579729	2.62932	0.788541	1
bta-miR-2407	-0.439479	7.47223	0.78901	1
bta-miR-2285l	-0.351693	2.44635	0.79001	1
bta-miR-107	-0.378288	7.96286	0.790998	1
bta-miR-2285db	0.42327	0.717449	0.791619	1
bta-miR-195	-0.36102	3.97777	0.794314	1
bta-miR-196b	-0.185603	8.11043	0.796882	1
bta-miR-1296	-0.389697	4.54006	0.798804	1
bta-miR-339b	0.274338	7.3997	0.803452	1
bta-miR-362-5p	-0.414358	4.85764	0.805745	1
bta-miR-2285ba	0.28513	3.0197	0.806882	1
bta-miR-2419-5p	-0.240682	5.58324	0.813115	1
bta-miR-2285cl	0.567612	2.77502	0.814365	1
bta-miR-425-5p	-0.298535	4.44736	0.814398	1
bta-miR-151-5p	0.185262	6.71254	0.815271	1
bta-miR-27b	-0.19651	9.60319	0.818046	1
bta-miR-10174-3p	-0.116677	11.6607	0.818737	1
bta-miR-182	0.130938	11.3233	0.818754	1
bta-miR-331-3p	0.24534	5.01281	0.823605	1
bta-miR-499	-0.622652	1.79723	0.82392	1
bta-miR-150	-0.469844	3.5124	0.824078	1
bta-miR-2285aj-5p	0.132933	8.68204	0.829384	1
bta-miR-504	0.25446	5.77584	0.830737	1
bta-miR-2900	-0.311768	-0.962629	0.831594	1
bta-miR-345-3p	0.369224	3.97465	0.83179	1
bta-miR-2411-5p	-0.668932	0.991268	0.833248	1
bta-miR-2285bn	0.156271	7.12893	0.83509	1
bta-miR-2285di	0.220121	3.71669	0.836433	1
bta-miR-7	-0.147051	11.7974	0.838956	1
bta-miR-2285cf	-0.372047	1.34395	0.839845	1
bta-miR-218	-0.373795	3.74817	0.840536	1
bta-miR-2284k	0.142105	7.10137	0.846062	1
bta-miR-1343-5p	0.385755	3.93442	0.848834	1
bta-miR-11976	-0.25517	5.94212	0.851902	1
bta-miR-141	0.0949152	12.0889	0.852435	1
bta-miR-2285cw	0.512667	0.217437	0.853259	1
bta-miR-455-3p	0.618118	0.243703	0.857309	1
bta-miR-2285bj	0.207838	1.20887	0.861445	1
bta-miR-3600	-0.114268	8.53612	0.862553	1
bta-miR-425-3p	0.343153	3.22323	0.864199	1
bta-miR-2285cr	0.219481	0.53742	0.864254	1
bta-miR-2448-3p	-0.425033	2.48627	0.864386	1
bta-miR-365-3p	-0.380141	2.11376	0.865477	1
bta-miR-2285au	-0.203637	3.39988	0.870373	1
bta-miR-874	-0.337706	2.65214	0.872254	1
bta-miR-2285u	-0.439565	0.352774	0.872883	1
bta-miR-148c	0.109138	7.90786	0.875072	1
bta-miR-17-5p	-0.224305	5.21702	0.877228	1
bta-miR-92b	0.26926	5.01021	0.879351	1
bta-miR-2285f	0.118853	6.9712	0.882864	1
bta-miR-128	-0.105393	6.78615	0.885503	1
bta-miR-320b	-0.198356	-0.7194	0.885862	1
bta-miR-2285ao	0.29554	1.74482	0.890356	1
bta-miR-1468	0.108773	5.81532	0.892437	1
bta-miR-2285bh	0.280196	1.77808	0.893355	1
bta-miR-2285bo	0.18924	1.63711	0.897156	1
bta-miR-122	-0.291044	3.00216	0.901686	1
bta-miR-24-3p	0.133104	7.0158	0.903514	1
bta-miR-2890	-0.245896	2.93791	0.90435	1
bta-miR-19a	-0.182815	3.90456	0.906009	1
bta-miR-27a-3p	0.17923	8.58467	0.910242	1
bta-miR-2285n	0.0580733	11.1705	0.910484	1
bta-miR-2285p	-0.189883	2.73313	0.910861	1
bta-miR-378c	0.291345	1.18858	0.912647	1
bta-miR-1839	-0.0907468	6.75697	0.917646	1
bta-miR-12014	0.197026	1.69961	0.918314	1
bta-miR-7858	-0.144487	4.1412	0.918381	1
bta-miR-210	-0.131228	5.79045	0.919618	1
bta-miR-574	0.0958764	9.67949	0.920243	1
bta-miR-96	0.123528	5.86571	0.922089	1
bta-miR-2284m	-0.122304	0.791941	0.928495	1
bta-miR-23b-3p	-0.0421335	11.6342	0.933609	1
bta-miR-29d-5p	0.0620679	7.3989	0.935126	1
bta-let-7a-5p	0.0219402	17.1336	0.936168	1
bta-miR-139	0.204213	1.05869	0.94242	1
bta-miR-27a-5p	-0.188722	1.23449	0.942622	1
bta-miR-2285da	-0.0547185	9.75908	0.943291	1
bta-miR-222	-0.0559276	6.24735	0.944377	1
bta-miR-92a	0.0459328	8.87274	0.945833	1
bta-miR-374a	-0.0843927	6.47016	0.951002	1
bta-miR-2285aa	-0.09818	2.41879	0.952148	1
bta-miR-2285cb	-0.0810513	3.76864	0.952248	1
bta-miR-12056	0.178878	2.18745	0.953482	1
bta-miR-2284o	-0.105934	-0.276097	0.954631	1
bta-miR-2285ar	-0.203167	0.459516	0.958173	1
bta-miR-2285as	-0.0666084	-0.0257909	0.959277	1
bta-miR-126-3p	0.0739832	6.2274	0.962502	1
bta-miR-2285dd	-0.0345522	9.71893	0.963775	1
bta-miR-2285bi	-0.173165	0.446881	0.96433	1
bta-miR-2285ap	-0.167941	0.469782	0.964485	1
bta-miR-2285bc	-0.0474385	2.54241	0.969409	1
bta-miR-11995	-0.122027	0.579651	0.969755	1
bta-miR-11986b	0.0518019	5.33549	0.97207	1
bta-let-7a-3p	0.0882107	2.95236	0.972584	1
bta-let-7g	0.0197442	9.76544	0.973907	1
bta-miR-2285r	0.0293619	4.62171	0.974003	1
bta-miR-2285bu	0.0479268	1.66057	0.976865	1
bta-miR-29d-3p	0.0331231	3.89129	0.979068	1
bta-miR-2285de	-0.0174566	6.94131	0.981129	1
bta-miR-148a	0.00833146	14.5468	0.983161	1
bta-miR-664b	-0.0655414	2.46874	0.983602	1
bta-miR-2411-3p	-0.0828946	0.958254	0.983679	1
bta-miR-10167-3p	0.0303976	7.87915	0.984994	1
bta-miR-1251	-0.0132262	4.00853	0.993449	1
bta-miR-29b	-0.0051484	9.55166	0.994947	1
bta-miR-15b	-0.00237321	8.11657	0.998368	1
bta-miR-2285cm	0.000255809	3.80395	0.999818	1
bta-miR-137	0	0.584744	1	1
bta-miR-760-5p	0	0.852864	1	1
bta-miR-767	0	4.50721	1	1
bta-miR-2364	0	0.857582	1	1
bta-miR-2441	0	4.028	1	1
bta-miR-2454-5p	0	-0.100869	1	1
bta-miR-1842	0	2.50311	1	1
bta-miR-6775	0	-0.418654	1	1
bta-miR-12025	0	3.28621	1	1
bta-miR-12055	0	-0.112035	1	1
bta-miR-12061	0	1.48976	1	1
bta-miR-12062	0	2.10141	1	1

## Sheet:  SPvsS UF
	logFC	logCPM	PValue	FDR
bta-let-7b	1.13138	17.2925	1.29404e-08	2.91138e-06
bta-miR-3596	1.13138	17.2925	1.37006e-08	2.91138e-06
bta-miR-2478	-3.50672	16.6951	4.11144e-08	5.82454e-06
bta-miR-11980	-3.09787	14.9735	8.95653e-07	9.51631e-05
bta-miR-11987	-3.08269	12.0153	1.18267e-05	0.00100527
bta-miR-2358	-6.61476	8.23384	0.000164264	0.0116354
bta-miR-199a-3p	-8.85857	1.77903	0.00199288	0.0970006
bta-miR-2284r	-9.11663	1.37641	0.00200653	0.0970006
bta-miR-3604	-8.85858	1.77903	0.00205413	0.0970006
bta-miR-200c	1.04201	14.7403	0.00483877	0.182387
bta-miR-12034	-7.21947	0.417097	0.00497573	0.182387
bta-miR-130a	8.97601	4.12151	0.00535365	0.182387
bta-miR-105a	-8.35173	3.22459	0.00561911	0.182387
bta-miR-2467-3p	-7.39688	7.27328	0.00600803	0.182387
bta-miR-146a	-1.75892	8.00281	0.00716816	0.203098
bta-miR-2285ad	-5.36286	1.94002	0.00906615	0.220876
bta-miR-301a	-6.36014	1.17493	0.00949214	0.220876
bta-miR-2285e	-6.87337	2.38548	0.00967512	0.220876
bta-miR-11984	7.41777	1.31081	0.0101349	0.220876
bta-miR-1291	-4.47578	3.7267	0.0103942	0.220876
bta-miR-11978	-5.72843	4.44957	0.01191	0.22803
bta-miR-181d	-5.90716	0.25358	0.0122565	0.22803
bta-miR-6517	-7.95474	2.72298	0.0123405	0.22803
bta-miR-6522	-8.77264	2.3154	0.0130255	0.23066
bta-miR-190b	-7.01812	0.103313	0.0147464	0.243622
bta-miR-153	-5.28849	1.6945	0.0149039	0.243622
bta-let-7a-5p	0.665804	17.1336	0.0155337	0.244511
bta-miR-2409	6.1576	5.68053	0.0164925	0.250333
bta-miR-11988	-6.01877	6.71597	0.0175013	0.253046
bta-miR-7865	-4.23555	1.05128	0.0178621	0.253046
bta-miR-628	-6.83206	2.44131	0.0186035	0.253727
bta-miR-4286	-5.52212	-0.656106	0.0196279	0.253727
bta-miR-1777a	-4.21368	7.12502	0.0208717	0.253727
bta-miR-3613b	7.00733	0.516677	0.0209131	0.253727
bta-miR-29c	0.956381	12.1854	0.0209696	0.253727
bta-let-7c	0.930813	14.3257	0.0214922	0.253727
bta-miR-2285cf	-4.62998	1.34395	0.0233617	0.268344
bta-miR-2447	-3.97901	4.5495	0.0255794	0.269887
bta-miR-137	-6.73834	0.584744	0.0257409	0.269887
bta-miR-202	-5.95737	0.338046	0.0259362	0.269887
bta-miR-215	7.05079	0.960905	0.0263031	0.269887
bta-miR-767	-6.02064	4.50721	0.0266712	0.269887
bta-miR-2285ah-5p	5.19605	6.9855	0.0273781	0.270598
bta-miR-1284	-6.00962	0.954245	0.030446	0.294081
bta-miR-10175-3p	-4.50063	6.582	0.0332934	0.299814
bta-miR-11986c	-4.8943	3.21549	0.0336512	0.299814
bta-miR-6775	-5.21062	-0.418654	0.0341399	0.299814
bta-miR-2285bz	-5.59686	0.922394	0.0344717	0.299814
bta-miR-2361	-7.05174	1.75821	0.0345668	0.299814
bta-miR-2285u	-5.09356	0.352774	0.0365251	0.306187
bta-miR-141	1.07691	12.0889	0.0368854	0.306187
bta-miR-2354	6.15106	0.468437	0.0374629	0.306187
bta-miR-2436-3p	-4.4531	6.05349	0.0396606	0.318033
bta-miR-148a	0.811372	14.5468	0.0411346	0.322201
bta-miR-2284v	-5.95597	-0.103636	0.0416965	0.322201
bta-miR-125a	0.785202	12.9854	0.0424981	0.32253
bta-miR-2284c	-5.95627	0.288198	0.0448113	0.33412
bta-miR-2285n	-1.03761	11.1705	0.0468041	0.341825
bta-miR-11992	7.74865	0.398885	0.0481213	0.341825
bta-miR-507-3p	-6.7606	1.25437	0.0482577	0.341825
bta-miR-2285bq	-4.09167	1.0471	0.0502541	0.347352
bta-miR-149-3p	-4.1768	3.29108	0.0507149	0.347352
bta-miR-2325c	-3.46196	7.16892	0.0514899	0.347352
bta-miR-2285cw	5.69522	0.217437	0.052864	0.35105
bta-miR-3432a	0.982539	10.0839	0.0557645	0.364125
bta-miR-342	0.843967	11.6148	0.0569236	0.364125
bta-miR-125b	0.479793	14.9915	0.0574032	0.364125
bta-miR-2887	-5.8146	0.243423	0.0597393	0.373371
bta-miR-130b	-4.81946	1.56935	0.0615645	0.379201
bta-miR-2431-5p	7.5332	0.615455	0.0665107	0.403815
bta-miR-211	-2.44494	1.40693	0.0686652	0.411024
bta-miR-6526	-1.86143	5.29673	0.0703307	0.415146
bta-miR-34b	-3.67292	1.53759	0.0803362	0.465257
bta-miR-6119-5p	-2.18895	5.16279	0.0810094	0.465257
bta-miR-7180	-5.81598	1.26966	0.0825952	0.466938
bta-miR-194b-3p	-5.35529	0.757407	0.0835495	0.466938
bta-miR-2285dc	2.67828	1.12315	0.0845982	0.466938
bta-miR-204	-1.05876	8.25243	0.0870383	0.474247
bta-miR-1584-5p	-3.0056	-0.23617	0.0885123	0.476174
bta-miR-326	5.38353	0.0592555	0.0920007	0.488754
bta-miR-2285bh	3.88636	1.77808	0.0937607	0.491429
bta-let-7e	0.709509	11.3173	0.0957494	0.491429
bta-miR-2888	3.58168	-0.447056	0.0959732	0.491429
bta-miR-2312	-3.94595	-0.506934	0.098876	0.493699
bta-miR-10185-5p	-2.21856	1.09158	0.0990079	0.493699
bta-miR-2284j	-3.94589	-0.506934	0.0999014	0.493699
bta-miR-2443	2.53293	3.78423	0.101461	0.495645
bta-miR-21-5p	-0.774411	13.7808	0.102715	0.496069
bta-miR-29a	0.708982	10.9608	0.107804	0.510789
bta-let-7d	1.09167	7.83341	0.108167	0.510789
bta-miR-92a	1.08926	8.87274	0.111213	0.519403
bta-miR-335	-2.19955	5.75447	0.113734	0.5254
bta-miR-346	4.44407	0.492262	0.126024	0.575918
bta-miR-1247-3p	-5.75741	2.22172	0.129391	0.585014
bta-miR-2285cp	3.2363	1.19157	0.144451	0.645773
bta-miR-135a	0.952244	10.1571	0.147535	0.645773
bta-miR-1246	-1.24685	10.1604	0.150001	0.645773
bta-miR-12056	5.00202	2.18745	0.151136	0.645773
bta-miR-6518	2.46826	3.08489	0.15122	0.645773
bta-miR-1777b	-3.28442	0.49961	0.151946	0.645773
bta-miR-99a-3p	-4.065	0.648713	0.157206	0.658134
bta-miR-6527	-4.35551	2.37007	0.159649	0.658134
bta-miR-2284aa	-1.85492	3.95942	0.160213	0.658134
bta-miR-2285y	-1.85492	3.95942	0.161049	0.658134
bta-miR-100	-0.884271	10.4447	0.165382	0.669402
bta-miR-11985	-3.6831	1.13897	0.173739	0.696594
bta-miR-29b	1.11051	9.55166	0.177011	0.698963
bta-miR-30a-5p	0.548264	11.9877	0.178633	0.698963
bta-miR-2285ca	-3.13652	1.51035	0.179264	0.698963
bta-miR-2285db	-2.18449	0.717449	0.184985	0.714713
bta-miR-34c	-1.08411	7.75461	0.189319	0.724869
bta-miR-2285l	-1.74238	2.44635	0.192712	0.731273
bta-miR-669	0.839854	8.43731	0.203436	0.765136
bta-miR-12036	-1.70333	-0.746241	0.205453	0.765942
bta-miR-11972	-1.73328	4.10965	0.212725	0.782789
bta-miR-151-5p	0.994165	6.71254	0.213655	0.782789
bta-miR-2431-3p	-1.71349	2.57436	0.218715	0.785729
bta-miR-2442	-1.33134	-0.649312	0.222711	0.785729
bta-miR-2285av	-2.11687	1.68402	0.227309	0.785729
bta-miR-423-5p	0.896614	10.8228	0.227394	0.785729
bta-miR-1	-0.934889	12.8175	0.228593	0.785729
bta-miR-545-5p	2.07381	0.153582	0.229665	0.785729
bta-miR-194b	-4.3535	1.04418	0.231607	0.785729
bta-miR-184	-1.63165	9.59288	0.233335	0.785729
bta-miR-129	-4.40095	1.09503	0.243916	0.785729
bta-miR-129-5p	-4.40094	1.09503	0.244391	0.785729
bta-miR-2284z	-0.777054	8.89305	0.244927	0.785729
bta-miR-2285cb	-1.541	3.76864	0.247316	0.785729
bta-miR-2892	-1.49127	5.42619	0.248135	0.785729
bta-miR-11997	-1.74976	4.33522	0.248269	0.785729
bta-miR-106b	3.209	2.70231	0.249714	0.785729
bta-miR-148b	0.670347	9.30932	0.254937	0.785729
bta-miR-99b	0.544565	10.4038	0.2564	0.785729
bta-miR-196a	1.27294	8.15427	0.256426	0.785729
bta-miR-361	1.05425	9.09071	0.257563	0.785729
bta-miR-101	0.932232	6.71736	0.258059	0.785729
bta-miR-449b	-1.91868	-0.203941	0.2581	0.785729
bta-miR-2284h-5p	-1.86417	0.64632	0.259789	0.785729
bta-miR-224	0.834539	7.73807	0.262629	0.785729
bta-miR-2284o	-3.30325	-0.276097	0.26436	0.785729
bta-miR-148d	0.882392	6.0955	0.264638	0.785729
bta-miR-2284k	-0.819655	7.10137	0.265259	0.785729
bta-miR-25	0.601564	10.0449	0.266753	0.785729
bta-miR-185	0.847111	6.28223	0.26692	0.785729
bta-miR-200a	0.412408	15.048	0.26815	0.785729
bta-miR-2483-3p	-2.79207	3.39714	0.269921	0.785729
bta-miR-2285bv	-0.735941	8.75251	0.27683	0.79647
bta-miR-2448-3p	2.89272	2.48627	0.277359	0.79647
bta-miR-328	0.85711	6.16604	0.279821	0.796854
bta-miR-2364	-1.7378	0.857582	0.281242	0.796854
bta-miR-16a	0.485592	12.5289	0.284544	0.797754
bta-miR-2284n	-0.722144	8.73923	0.285314	0.797754
bta-miR-23a	0.509475	11.8164	0.288379	0.801054
bta-miR-26c	0.432946	12.863	0.291589	0.804709
bta-miR-2483-5p	-2.60119	2.11996	0.29409	0.806377
bta-miR-2285q	2.31374	2.09829	0.300559	0.814858
bta-miR-2340	-1.50333	8.99787	0.301018	0.814858
bta-miR-744	0.885683	5.83159	0.305861	0.818654
bta-miR-3065	-2.99239	2.73215	0.307257	0.818654
bta-miR-338	-2.99239	2.73215	0.308199	0.818654
bta-miR-2889	-1.55663	10.2854	0.316065	0.834334
bta-miR-2285cj	-2.69651	0.855822	0.318814	0.836394
bta-miR-2284ab	1.57029	3.36481	0.323835	0.843095
bta-miR-6523a	3.44697	2.12935	0.325336	0.843095
bta-miR-2284w	-1.64653	4.33484	0.329004	0.847434
bta-miR-11986b	1.4606	5.33549	0.333069	0.852736
bta-miR-449a	-0.766102	7.73062	0.33963	0.864327
bta-miR-2285aj-5p	-0.585672	8.68204	0.343708	0.869499
bta-miR-2436-5p	1.8199	1.89899	0.349931	0.877173
bta-miR-2284x	-0.944851	6.98914	0.352352	0.877173
bta-miR-2284y	-1.55082	3.39611	0.352933	0.877173
bta-miR-429	0.594251	11.5199	0.358166	0.87772
bta-miR-12057	1.73281	7.37542	0.359493	0.87772
bta-miR-191	-0.38235	12.3969	0.360724	0.87772
bta-miR-2285co	1.61825	0.19256	0.361414	0.87772
bta-miR-2285cq	-0.751564	6.60013	0.365193	0.881857
bta-let-7g	0.540832	9.76544	0.371545	0.883921
bta-miR-9-5p	0.966181	6.80215	0.372457	0.883921
bta-miR-155	0.932176	5.08445	0.374682	0.883921
bta-miR-484	-1.86448	3.78333	0.377282	0.883921
bta-miR-2285ce	-0.465847	11.8577	0.384515	0.883921
bta-miR-27b	0.742171	9.60319	0.387257	0.883921
bta-miR-2285j	-0.470108	11.7347	0.387612	0.883921
bta-miR-2285cs	-0.465771	11.8442	0.387665	0.883921
bta-miR-139	2.56294	1.05869	0.388413	0.883921
bta-miR-2373-5p	1.19732	0.91029	0.389407	0.883921
bta-miR-2285cc	-0.466153	11.8277	0.390166	0.883921
bta-miR-2900	1.01284	-0.962629	0.391757	0.883921
bta-miR-96	1.08954	5.86571	0.39356	0.883921
bta-miR-92b	1.53883	5.01021	0.396288	0.883921
bta-miR-2428	1.20567	6.66954	0.398125	0.883921
bta-miR-2285ao	-1.84416	1.74482	0.400057	0.883921
bta-miR-122	-2.05294	3.00216	0.401404	0.883921
bta-miR-196b	0.602221	8.11043	0.40503	0.883991
bta-miR-32	1.43225	5.22322	0.409024	0.883991
bta-miR-2285ae	1.09531	0.604306	0.411229	0.883991
bta-miR-2407	0.940282	7.47223	0.411498	0.883991
bta-miR-30c	-0.770665	7.62863	0.413499	0.883991
bta-miR-22-5p	-2.2321	3.13946	0.413916	0.883991
bta-miR-2285dg	-1.02091	1.9497	0.417002	0.88613
bta-miR-222	0.636945	6.24735	0.428253	0.897076
bta-miR-10172-3p	1.00631	0.185201	0.428312	0.897076
bta-miR-2285bb	-1.56954	1.46985	0.428957	0.897076
bta-miR-33a	-2.2285	2.62786	0.43233	0.897076
bta-miR-10174-3p	0.396099	11.6607	0.436879	0.897076
bta-miR-20a	-0.843107	6.82015	0.440309	0.897076
bta-miR-151-3p	0.549135	10.3866	0.442803	0.897076
bta-miR-182	0.439094	11.3233	0.442999	0.897076
bta-miR-30d	0.29228	13.8849	0.445281	0.897076
bta-miR-2890	-1.58535	2.93791	0.446727	0.897076
bta-miR-2285p	-1.28803	2.73313	0.452336	0.897076
bta-miR-374a	1.04131	6.47016	0.452925	0.897076
bta-miR-12059	0.917705	-0.639461	0.45521	0.897076
bta-miR-1307	1.37109	7.73163	0.455905	0.897076
bta-miR-10a	0.23968	14.842	0.456592	0.897076
bta-miR-454	2.21444	2.2086	0.457588	0.897076
bta-miR-7857-5p	-2.65464	0.605396	0.464509	0.897076
bta-miR-2898	-0.324406	16.1597	0.466882	0.897076
bta-miR-7859	1.24748	3.15555	0.467016	0.897076
bta-miR-2285dl-3p	1.19155	2.41296	0.468377	0.897076
bta-miR-3600	-0.475536	8.53612	0.471949	0.897076
bta-miR-19a	-1.11424	3.90456	0.474997	0.897076
bta-miR-17-5p	1.04382	5.21702	0.475768	0.897076
bta-miR-10167-3p	1.16034	7.87915	0.47789	0.897076
bta-miR-183	0.408624	11.3039	0.481209	0.897076
bta-miR-16b	-0.650155	8.78077	0.485748	0.897076
bta-miR-1306	0.605474	5.84323	0.487746	0.897076
bta-miR-197	0.574067	5.79749	0.488511	0.897076
bta-miR-3613a	1.59097	2.65313	0.48854	0.897076
bta-miR-132	1.74925	3.06659	0.489403	0.897076
bta-miR-2285by	-0.49162	7.69006	0.489505	0.897076
bta-miR-6529a	0.538887	6.88925	0.490036	0.897076
bta-miR-2285ap	-2.6921	0.469782	0.491837	0.897076
bta-miR-2285de	-0.505636	6.94131	0.493919	0.897076
bta-miR-2285ar	-2.72186	0.459516	0.501019	0.906098
bta-miR-2285bi	-2.66635	0.446881	0.507849	0.914559
bta-miR-2285f	-0.530376	6.9712	0.511693	0.915
bta-miR-1260b	-0.794514	9.77782	0.5124	0.915
bta-miR-2285cr	-0.813901	0.53742	0.514785	0.915413
bta-miR-98	0.575573	9.59271	0.517729	0.915742
bta-miR-2285as	-0.876841	-0.0257909	0.519279	0.915742
bta-miR-378c	1.72483	1.18858	0.527494	0.920573
bta-miR-2285c	1.74595	0.133454	0.527931	0.920573
bta-let-7i	0.445958	11.4454	0.530487	0.920573
bta-miR-181b	-0.964122	7.27224	0.530683	0.920573
bta-miR-200b	0.290762	12.2936	0.533917	0.921576
bta-miR-3431	0.488224	9.05453	0.535598	0.921576
bta-miR-127	-1.84114	0.338485	0.544694	0.933448
bta-miR-11975	-0.85779	5.85193	0.549824	0.937287
bta-miR-140	-0.460057	6.85014	0.551599	0.937287
bta-miR-1249	-1.32718	2.68181	0.553551	0.937287
bta-miR-362-5p	-0.989445	4.85764	0.559856	0.942528
bta-miR-2285i	-1.1834	1.29571	0.561082	0.942528
bta-miR-500	1.16541	2.52394	0.56924	0.949805
bta-miR-187	1.33831	1.53608	0.569883	0.949805
bta-miR-2285da	-0.433713	9.75908	0.573538	0.952162
bta-miR-221	-0.314604	10.212	0.581449	0.952282
bta-miR-2285dd	-0.417443	9.71893	0.583817	0.952282
bta-miR-411a	2.03253	1.43894	0.584066	0.952282
bta-miR-11976	-0.743538	5.94212	0.585669	0.952282
bta-miR-2411-5p	1.75892	0.991268	0.585686	0.952282
bta-miR-2419-5p	0.5487	5.58324	0.590694	0.952282
bta-miR-23b-3p	0.270252	11.6342	0.592992	0.952282
bta-miR-6119-3p	-1.25394	3.26921	0.593277	0.952282
bta-miR-2285bu	0.876708	1.66057	0.593776	0.952282
bta-miR-95	0.554755	6.72987	0.597576	0.954625
bta-miR-339a	-0.26902	10.638	0.599729	0.954625
bta-miR-2285b	-1.06865	2.48631	0.607176	0.961708
bta-miR-11993	1.77544	1.76654	0.608704	0.961708
bta-miR-1298	0.307157	8.78229	0.611524	0.962583
bta-miR-149-5p	1.32753	2.23545	0.61744	0.96831
bta-miR-186	-0.282592	8.98598	0.621897	0.970168
bta-miR-877	-1.10375	1.59309	0.62319	0.970168
bta-miR-2285aa	-0.792256	2.41879	0.627098	0.972688
bta-miR-375	0.595575	5.38574	0.631473	0.974206
bta-miR-218	-0.891133	3.74817	0.632661	0.974206
bta-miR-652	0.989328	3.9289	0.640635	0.981173
bta-miR-345-3p	0.806106	3.97465	0.644318	0.981173
bta-miR-2285bj	-0.539203	1.20887	0.644405	0.981173
bta-miR-11971	1.60065	2.05269	0.64642	0.981173
bta-miR-2285be	0.383452	6.3527	0.651992	0.984523
bta-miR-27a-3p	0.714644	8.58467	0.654128	0.984523
bta-miR-2285bc	-0.548837	2.54241	0.656392	0.984523
bta-miR-2285ac	0.496178	-0.33112	0.660362	0.984523
bta-miR-2285di	-0.458833	3.71669	0.666232	0.984523
bta-miR-11982	1.28742	4.0883	0.666509	0.984523
bta-let-7f	0.185134	14.7307	0.666821	0.984523
bta-miR-126-5p	-0.811411	3.12191	0.670558	0.984523
bta-miR-28	-1.04137	2.79168	0.674029	0.984523
bta-miR-128	0.304673	6.78615	0.677143	0.984523
bta-miR-146b	-0.653915	5.17543	0.683946	0.984523
bta-miR-181a	-0.397775	8.53602	0.689641	0.984523
bta-miR-7858	0.560358	4.1412	0.691431	0.984523
bta-miR-2285aw	-0.486549	-0.123477	0.692028	0.984523
bta-miR-210	-0.515699	5.79045	0.692139	0.984523
bta-miR-365-3p	0.874725	2.11376	0.697871	0.984523
bta-miR-425-3p	0.780237	3.22323	0.698267	0.984523
bta-miR-660	0.353629	7.02946	0.698746	0.984523
bta-miR-1839	-0.338387	6.75697	0.699945	0.984523
bta-miR-34a	0.542595	4.68306	0.701844	0.984523
bta-miR-874	-0.802206	2.65214	0.702746	0.984523
bta-miR-107	0.537372	7.96286	0.706715	0.984523
bta-miR-499	1.02536	1.79723	0.712792	0.984523
bta-miR-2285t	-0.984433	2.90351	0.713642	0.984523
bta-miR-126-3p	0.568008	6.2274	0.718826	0.984523
bta-miR-2336	1.0948	2.70439	0.720502	0.984523
bta-miR-24-3p	0.39253	7.0158	0.720962	0.984523
bta-miR-455-3p	1.20846	0.243703	0.724164	0.984523
bta-miR-6123	-0.464106	3.95495	0.725267	0.984523
bta-miR-320b	-0.633886	-0.7194	0.726919	0.984523
bta-miR-532	-0.327399	6.63895	0.727107	0.984523
bta-miR-93	-0.219683	8.02171	0.729103	0.984523
bta-miR-769	-0.435756	8.87684	0.730148	0.984523
bta-miR-99a-5p	-0.189835	9.22834	0.733415	0.984523
bta-miR-30b-5p	0.221297	7.74455	0.734835	0.984523
bta-miR-135b	0.403748	0.279367	0.735291	0.984523
bta-miR-2285at	-0.35785	5.4129	0.736617	0.984523
bta-miR-423-3p	0.243105	7.36646	0.73675	0.984523
bta-miR-26b	0.144214	12.979	0.741558	0.984523
bta-miR-2411-3p	1.35352	0.958254	0.742021	0.984523
bta-miR-6120-3p	-0.489806	4.44797	0.746363	0.984523
bta-miR-935	-0.499908	0.821966	0.752487	0.984523
bta-miR-193a-5p	0.363115	5.05037	0.75362	0.984523
bta-miR-507b	-0.737792	2.61664	0.754732	0.984523
bta-miR-1468	-0.250683	5.81532	0.755176	0.984523
bta-miR-2285bl	-0.674349	2.62932	0.755187	0.984523
bta-miR-152	0.195522	8.40656	0.762234	0.985525
bta-miR-2305	0.508641	1.50237	0.762731	0.985525
bta-miR-2285au	-0.375623	3.39988	0.762912	0.985525
bta-miR-2285ct	-0.946405	2.06986	0.766255	0.986843
bta-miR-30e-5p	-0.169161	10.8608	0.775664	0.995944
bta-miR-12014	-0.53699	1.69961	0.778059	0.996009
bta-miR-671	-0.631642	1.42808	0.789462	1
bta-miR-331-3p	0.290687	5.01281	0.791431	1
bta-miR-29d-5p	0.20079	7.3989	0.792237	1
bta-miR-2285cm	-0.27833	3.80395	0.793076	1
bta-miR-2346	-0.76003	2.95044	0.793179	1
bta-miR-2285cd	-0.224951	4.04364	0.795467	1
bta-miR-2285bn	-0.18621	7.12893	0.80393	1
bta-miR-502a	-0.389505	4.54131	0.80421	1
bta-miR-10179-5p	0.523698	3.2658	0.804407	1
bta-miR-574	-0.234809	9.67949	0.806247	1
bta-miR-1343-5p	-0.483014	3.93442	0.810584	1
bta-miR-491	-0.423422	3.92495	0.816737	1
bta-miR-192	-0.231639	6.56345	0.81755	1
bta-miR-15b	0.263296	8.11657	0.820498	1
bta-miR-2285r	-0.197972	4.62171	0.825432	1
bta-miR-10b	0.0844034	13.8917	0.829831	1
bta-miR-12058	0.448933	9.43621	0.832187	1
bta-miR-1911	0.159446	6.53597	0.832489	1
bta-miR-9851	0.460423	2.60542	0.833786	1
bta-miR-194	-0.15958	5.82075	0.839507	1
bta-miR-345-5p	-0.35158	2.6218	0.840027	1
bta-miR-27a-5p	-0.528057	1.23449	0.841066	1
bta-miR-2285ba	-0.220814	3.0197	0.849231	1
bta-miR-6528	0.490238	1.93788	0.849306	1
bta-miR-22-3p	0.14728	6.22541	0.850898	1
bta-miR-378	0.283466	3.50918	0.858355	1
bta-miR-296-3p	0.333044	3.28325	0.859263	1
bta-miR-3432b	0.190526	0.140574	0.86173	1
bta-miR-19b	-0.18988	6.89862	0.862956	1
bta-miR-664b	0.536208	2.46874	0.866536	1
bta-miR-374b	-0.165411	4.70229	0.867073	1
bta-miR-339b	-0.180319	7.3997	0.869944	1
bta-miR-223	0.357385	7.69625	0.871748	1
bta-miR-31	-0.370423	2.06607	0.872656	1
bta-miR-2388-3p	-0.127491	9.79876	0.873813	1
bta-miR-2285cl	-0.376079	2.77502	0.875744	1
bta-miR-191b	-0.347493	1.29034	0.878067	1
bta-miR-148c	0.104689	7.90786	0.880043	1
bta-miR-2304	0.405144	2.3688	0.890177	1
bta-miR-10182-5p	0.413997	0.56204	0.89185	1
bta-miR-1296	0.205065	4.54006	0.893054	1
bta-miR-206	0.322836	8.83825	0.89412	1
bta-miR-2284d	0.0966445	7.948	0.894572	1
bta-miR-1251	0.212412	4.00853	0.894824	1
bta-miR-340	0.373577	1.72588	0.899304	1
bta-miR-11995	0.397506	0.579651	0.902253	1
bta-let-7a-3p	-0.264686	2.95236	0.917573	1
bta-miR-1264	0.253118	2.06599	0.923569	1
bta-miR-2285bf	-0.0709839	6.94814	0.925499	1
bta-miR-483	0.241199	3.95749	0.930502	1
bta-miR-2285x	-0.0974048	2.40921	0.9383	1
bta-miR-425-5p	-0.098251	4.44736	0.938339	1
bta-miR-29d-3p	-0.0902111	3.89129	0.942761	1
bta-miR-29e	0.101734	3.34116	0.948509	1
bta-miR-11989	-0.119384	1.28397	0.957691	1
bta-miR-103	0.0262021	11.7249	0.958742	1
bta-miR-12030	-0.0733906	2.94161	0.96143	1
bta-miR-15a	-0.0811985	3.25504	0.965923	1
bta-miR-190a	-0.069067	4.3028	0.966288	1
bta-miR-195	0.0577845	3.97777	0.966458	1
bta-miR-150	0.0827627	3.5124	0.968683	1
bta-miR-760-3p	-0.0815503	2.64919	0.971584	1
bta-miR-30f	-0.0224999	8.05722	0.972957	1
bta-miR-2285al-5p	-0.0316894	3.11062	0.977681	1
bta-miR-2410	0.00724359	2.12247	0.978507	1
bta-miR-320a	0.014044	11.3068	0.980136	1
bta-miR-2285bo	0.0349251	1.63711	0.98067	1
bta-miR-2284m	0.0296094	0.791941	0.982642	1
bta-miR-452	0.013386	8.35807	0.983887	1
bta-miR-421	0.0222257	5.19287	0.984678	1
bta-miR-7	-0.01381	11.7974	0.984766	1
bta-miR-324	-0.026133	3.9803	0.987217	1
bta-miR-205	0.00744274	11.7805	0.987383	1
bta-miR-504	0.0179794	5.77584	0.987936	1
bta-miR-18b	0	3.43459	1	1
bta-miR-365-5p	0	-0.265812	1	1
bta-miR-497	0	1.29193	1	1
bta-miR-143	0	3.78895	1	1
bta-miR-217	0	0.932094	1	1
bta-miR-760-5p	0	0.852864	1	1
bta-miR-2348	0	6.8549	1	1
bta-miR-2382-3p	0	2.34315	1	1
bta-miR-2441	0	4.028	1	1
bta-miR-2454-5p	0	-0.100869	1	1
bta-miR-2455	0	1.92983	1	1
bta-miR-1247-5p	0	-0.894259	1	1
bta-miR-1842	0	2.50311	1	1
bta-miR-11996	0	-1.03687	1	1
bta-miR-12019	0	-0.902486	1	1
bta-miR-12025	0	3.28621	1	1
bta-miR-12055	0	-0.112035	1	1
bta-miR-12061	0	1.48976	1	1
bta-miR-12062	0	2.10141	1	1

## Sheet: SPEvsS UF
	logFC	logCPM	PValue	FDR
bta-miR-217	7.81625	0.932094	0.00192719	0.629122
bta-miR-2348	7.21536	6.8549	0.00740188	0.629122
bta-miR-2436-3p	-6.5239	6.05349	0.00796044	0.629122
bta-miR-130a	8.19115	4.12151	0.00819866	0.629122
bta-miR-545-5p	7.25244	0.153582	0.0107937	0.629122
bta-miR-18b	5.85046	3.43459	0.0120694	0.629122
bta-miR-215	8.48408	0.960905	0.0140049	0.629122
bta-miR-10172-3p	7.38743	0.185201	0.0152411	0.629122
bta-miR-135a	1.57966	10.1571	0.0179312	0.629122
bta-let-7a-5p	0.643864	17.1336	0.0192528	0.629122
bta-miR-2431-3p	6.83301	2.57436	0.0218354	0.629122
bta-miR-2428	6.76175	6.66954	0.023844	0.629122
bta-miR-200a	0.841798	15.048	0.0245563	0.629122
bta-miR-11984	5.50624	1.31081	0.0314658	0.629122
bta-miR-127	-7.91569	0.338485	0.0317574	0.629122
bta-miR-143	5.64736	3.78895	0.0324843	0.629122
bta-miR-2285co	4.18001	0.19256	0.032557	0.629122
bta-miR-2285ct	-8.63153	2.06986	0.0327943	0.629122
bta-miR-2898	0.952955	16.1597	0.0340511	0.629122
bta-miR-2888	5.25093	-0.447056	0.0352424	0.629122
bta-miR-2285n	-1.09569	11.1705	0.0360283	0.629122
bta-miR-2285cf	-4.25794	1.34395	0.0390509	0.629122
bta-miR-12057	-4.62438	7.37542	0.0409771	0.629122
bta-miR-2305	3.84232	1.50237	0.040995	0.629122
bta-miR-2382-3p	6.2802	2.34315	0.0418803	0.629122
bta-miR-148a	0.803041	14.5468	0.0432357	0.629122
bta-miR-137	-6.73834	0.584744	0.0440977	0.629122
bta-miR-10182-5p	-7.30931	0.56204	0.0446379	0.629122
bta-miR-12059	5.99603	-0.639461	0.0447676	0.629122
bta-miR-200b	0.937536	12.2936	0.0465847	0.629122
bta-miR-1247-5p	4.76933	-0.894259	0.047695	0.629122
bta-miR-767	-6.02064	4.50721	0.0480245	0.629122
bta-miR-2436-5p	4.53068	1.89899	0.050757	0.629122
bta-miR-497	6.99	1.29193	0.0508749	0.629122
bta-miR-11987	-1.28645	12.0153	0.0518101	0.629122
bta-miR-141	0.981994	12.0889	0.0565909	0.668087
bta-miR-200c	0.693866	14.7403	0.0591395	0.679305
bta-miR-6775	-5.21062	-0.418654	0.0620341	0.693802
bta-miR-2285cw	5.18255	0.217437	0.0663228	0.722749
bta-miR-2285u	-4.654	0.352774	0.0726932	0.76231
bta-miR-29e	-3.10076	3.34116	0.0735405	0.76231
bta-miR-190b	-5.73825	0.103313	0.0753785	0.762758
bta-miR-26c	0.710494	12.863	0.0844858	0.817284
bta-miR-11992	5.92607	0.398885	0.084613	0.817284
bta-miR-11996	4.72429	-1.03687	0.0990109	0.918523
bta-miR-2431-5p	6.05616	0.615455	0.0994166	0.918523
bta-miR-429	1.03301	11.5199	0.1127	0.951261
bta-miR-2285bh	3.60617	1.77808	0.117797	0.951261
bta-miR-1291	-3.15199	3.7267	0.120011	0.951261
bta-miR-105a	-4.48032	3.22459	0.121108	0.951261
bta-miR-2285db	-2.60776	0.717449	0.122989	0.951261
bta-miR-769	-2.02402	8.87684	0.124186	0.951261
bta-miR-92a	1.04332	8.87274	0.126881	0.951261
bta-miR-4286	-4.15918	-0.656106	0.128398	0.951261
bta-miR-1584-5p	3.97661	-0.23617	0.129537	0.951261
bta-miR-2285cj	-4.5992	0.855822	0.132305	0.951261
bta-miR-2410	5.50906	2.12247	0.132336	0.951261
bta-miR-153	3.60127	1.6945	0.133899	0.951261
bta-miR-125b	-0.377981	14.9915	0.134077	0.951261
bta-miR-320a	-0.851283	11.3068	0.134296	0.951261
bta-miR-6528	-4.62715	1.93788	0.143111	0.989769
bta-miR-149-3p	4.02426	3.29108	0.151705	0.989769
bta-miR-12019	3.44282	-0.902486	0.151958	0.989769
bta-miR-326	4.28477	0.0592555	0.152123	0.989769
bta-miR-2455	3.3956	1.92983	0.152316	0.989769
bta-miR-671	-3.91023	1.42808	0.155767	0.989769
bta-miR-2354	3.6893	0.468437	0.157283	0.989769
bta-miR-2285x	-1.84657	2.40921	0.161105	0.989769
bta-miR-148d	1.1053	6.0955	0.164612	0.989769
bta-miR-12056	4.82314	2.18745	0.16522	0.989769
bta-miR-2478	0.808687	16.6951	0.16535	0.989769
bta-miR-6517	-3.77583	2.72298	0.169161	0.998521
bta-miR-29b	1.11566	9.55166	0.175159	1
bta-miR-16a	0.613861	12.5289	0.176736	1
bta-miR-3065	-4.11189	2.73215	0.182613	1
bta-miR-338	-4.11212	2.73215	0.183442	1
bta-miR-2284k	-0.961761	7.10137	0.19279	1
bta-miR-132	3.51336	3.06659	0.196694	1
bta-miR-10a	0.407631	14.842	0.205963	1
bta-miR-12034	-2.70448	0.417097	0.213932	1
bta-miR-10175-3p	-3.13598	6.582	0.216679	1
bta-miR-2448-3p	3.31776	2.48627	0.222079	1
bta-miR-21-5p	0.577695	13.7808	0.222283	1
bta-miR-935	2.26516	0.821966	0.226671	1
bta-miR-1777a	-2.20413	7.12502	0.229481	1
bta-miR-2285bq	-2.4175	1.0471	0.234942	1
bta-let-7f	0.509974	14.7307	0.236717	1
bta-miR-2285bb	2.41615	1.46985	0.241799	1
bta-miR-2285aj-5p	-0.718605	8.68204	0.246404	1
bta-miR-10b	0.454926	13.8917	0.247658	1
bta-miR-11975	-1.68191	5.85193	0.257942	1
bta-miR-2284r	-2.78998	1.37641	0.258707	1
bta-miR-32	1.96963	5.22322	0.264271	1
bta-miR-2285ah-5p	-1.69647	6.9855	0.271322	1
bta-miR-652	2.4171	3.9289	0.274752	1
bta-miR-877	-2.60703	1.59309	0.275218	1
bta-miR-27b	0.938681	9.60319	0.275797	1
bta-miR-196b	0.787824	8.11043	0.277478	1
bta-miR-211	-1.44519	1.40693	0.279015	1
bta-miR-30b-5p	0.707867	7.74455	0.281345	1
bta-miR-197	0.895629	5.79749	0.2828	1
bta-miR-2285cb	-1.45995	3.76864	0.287764	1
bta-miR-2284d	-0.77768	7.948	0.28946	1
bta-miR-26b	0.462442	12.979	0.291225	1
bta-miR-2285l	-1.39069	2.44635	0.300265	1
bta-miR-6518	1.73031	3.08489	0.302791	1
bta-miR-2284o	-3.19732	-0.276097	0.303275	1
bta-miR-491	-1.93621	3.92495	0.306541	1
bta-miR-11989	-2.44145	1.28397	0.307059	1
bta-miR-449a	0.814318	7.73062	0.310546	1
bta-miR-151-5p	0.808903	6.71254	0.310882	1
bta-miR-10174-3p	0.512776	11.6607	0.315214	1
bta-miR-6522	-3.18384	2.3154	0.316261	1
bta-miR-1247-3p	3.79752	2.22172	0.316634	1
bta-miR-6123	-1.33091	3.95495	0.323568	1
bta-miR-502a	-1.58548	4.54131	0.324803	1
bta-miR-483	2.94155	3.95749	0.326276	1
bta-miR-2900	1.32461	-0.962629	0.3285	1
bta-miR-2407	1.37976	7.47223	0.328781	1
bta-miR-2285bz	-2.24639	0.922394	0.329618	1
bta-miR-98	0.871216	9.59271	0.329643	1
bta-miR-1777b	-2.28027	0.49961	0.33189	1
bta-let-7i	0.690575	11.4454	0.332734	1
bta-miR-365-5p	1.319	-0.265812	0.335209	1
bta-miR-2285ao	-2.1397	1.74482	0.338124	1
bta-miR-130b	2.97812	1.56935	0.34437	1
bta-miR-2285by	0.667158	7.69006	0.349377	1
bta-miR-2285bf	0.713647	6.94814	0.349873	1
bta-miR-374b	0.932624	4.70229	0.350105	1
bta-miR-11986b	1.4088	5.33549	0.350201	1
bta-miR-95	0.979978	6.72987	0.354375	1
bta-miR-2364	-1.7378	0.857582	0.3574	1
bta-miR-205	-0.420732	11.7805	0.372498	1
bta-miR-2325c	-1.47678	7.16892	0.379411	1
bta-miR-2388-3p	-0.717108	9.79876	0.38049	1
bta-miR-1246	-0.751653	10.1604	0.381095	1
bta-miR-11997	1.44962	4.33522	0.383483	1
bta-let-7g	0.521088	9.76544	0.389321	1
bta-miR-17-5p	1.26813	5.21702	0.38966	1
bta-miR-222	0.692873	6.24735	0.389856	1
bta-miR-2285ad	-1.51004	1.94002	0.390498	1
bta-miR-11972	-1.17818	4.10965	0.392491	1
bta-miR-2285i	-1.76665	1.29571	0.393551	1
bta-miR-375	1.0676	5.38574	0.393756	1
bta-miR-12030	-1.31835	2.94161	0.395947	1
bta-miR-2447	1.46829	4.5495	0.396771	1
bta-let-7b	0.165441	17.2925	0.399916	1
bta-miR-2285cp	1.77551	1.19157	0.400388	1
bta-miR-3596	0.165441	17.2925	0.400725	1
bta-miR-224	0.624029	7.73807	0.401306	1
bta-miR-2285be	0.705031	6.3527	0.409048	1
bta-miR-11982	2.57682	4.0883	0.411047	1
bta-miR-181d	1.91023	0.25358	0.413531	1
bta-miR-339a	-0.417862	10.638	0.415576	1
bta-miR-374a	1.12571	6.47016	0.418195	1
bta-miR-196a	0.898578	8.15427	0.419689	1
bta-miR-2285f	-0.649229	6.9712	0.42283	1
bta-miR-139	2.35873	1.05869	0.425089	1
bta-miR-2285cr	-1.03338	0.53742	0.425418	1
bta-miR-2442	1.40986	-0.649312	0.428347	1
bta-miR-411a	3.08081	1.43894	0.429893	1
bta-miR-15a	1.53785	3.25504	0.430397	1
bta-miR-202	-2.36027	0.338046	0.430882	1
bta-miR-12036	1.64405	-0.746241	0.434174	1
bta-miR-2285cd	-0.685096	4.04364	0.43422	1
bta-miR-6529a	-0.610403	6.88925	0.435416	1
bta-miR-106b	2.066	2.70231	0.437932	1
bta-miR-223	-1.78339	7.69625	0.438517	1
bta-miR-2419-5p	0.789382	5.58324	0.441065	1
bta-miR-301a	1.79081	1.17493	0.444639	1
bta-miR-452	-0.505192	8.35807	0.447425	1
bta-miR-96	0.966013	5.86571	0.448644	1
bta-miR-2346	-2.26556	2.95044	0.453053	1
bta-miR-146a	0.473763	8.00281	0.457028	1
bta-miR-93	0.469629	8.02171	0.460125	1
bta-miR-11986c	1.5691	3.21549	0.46132	1
bta-miR-2411-5p	2.42785	0.991268	0.464559	1
bta-miR-2285av	1.25376	1.68402	0.466624	1
bta-miR-122	-1.7619	3.00216	0.46774	1
bta-miR-135b	0.908894	0.279367	0.468392	1
bta-miR-12058	-1.57307	9.43621	0.469654	1
bta-miR-3432b	0.794791	0.140574	0.479839	1
bta-miR-92b	1.26957	5.01021	0.481083	1
bta-miR-10167-3p	1.12994	7.87915	0.49049	1
bta-miR-2336	2.17533	2.70439	0.493507	1
bta-miR-2892	-0.871986	5.42619	0.49427	1
bta-miR-2443	1.0132	3.78423	0.494388	1
bta-let-7c	0.267328	14.3257	0.505742	1
bta-miR-6523a	2.19678	2.12935	0.508596	1
bta-miR-2285de	-0.48818	6.94131	0.509351	1
bta-miR-129	-2.27413	1.09503	0.510732	1
bta-miR-129-5p	-2.27419	1.09503	0.511149	1
bta-miR-2890	-1.33946	2.93791	0.519787	1
bta-miR-2285p	-1.09814	2.73313	0.522127	1
bta-miR-2285ap	-2.52416	0.469782	0.52371	1
bta-miR-107	0.91566	7.96286	0.524132	1
bta-miR-2285di	-0.678954	3.71669	0.526188	1
bta-miR-1911	-0.47917	6.53597	0.527004	1
bta-miR-20a	0.681461	6.82015	0.531987	1
bta-let-7d	0.420409	7.83341	0.532681	1
bta-miR-2285bj	-0.747041	1.20887	0.533838	1
bta-miR-184	-0.832926	9.59288	0.535793	1
bta-miR-2285ae	-0.877066	0.604306	0.536408	1
bta-miR-2285ar	-2.51869	0.459516	0.536925	1
bta-miR-23b-3p	0.312386	11.6342	0.537351	1
bta-miR-2285bi	-2.49318	0.446881	0.53974	1
bta-miR-126-5p	1.14917	3.12191	0.549625	1
bta-miR-19a	-0.931424	3.90456	0.550779	1
bta-miR-345-5p	1.02879	2.6218	0.559425	1
bta-miR-10179-5p	-1.26226	3.2658	0.560607	1
bta-miR-155	0.607166	5.08445	0.56156	1
bta-miR-499	1.64801	1.79723	0.563368	1
bta-miR-2285as	-0.810233	-0.0257909	0.56424	1
bta-miR-29c	0.234376	12.1854	0.568374	1
bta-miR-128	0.410066	6.78615	0.576055	1
bta-miR-365-3p	1.25487	2.11376	0.58128	1
bta-miR-3600	-0.361268	8.53612	0.584598	1
bta-miR-2304	-1.63336	2.3688	0.585639	1
bta-miR-11980	-0.314904	14.9735	0.588948	1
bta-miR-16b	0.502997	8.78077	0.58916	1
bta-miR-182	0.308156	11.3233	0.589991	1
bta-miR-324	0.885515	3.9803	0.590601	1
bta-miR-378c	1.43348	1.18858	0.596369	1
bta-miR-2285dg	-0.670175	1.9497	0.598405	1
bta-miR-2285cs	-0.282925	11.8442	0.599291	1
bta-miR-2285ce	-0.279531	11.8577	0.601325	1
bta-miR-1	-0.402231	12.8175	0.603699	1
bta-miR-628	1.25243	2.44131	0.603744	1
bta-miR-2285cc	-0.280941	11.8277	0.604058	1
bta-miR-296-3p	-0.987555	3.28325	0.604147	1
bta-miR-181b	0.778537	7.27224	0.612194	1
bta-miR-2285bu	0.828781	1.66057	0.614641	1
bta-miR-2285dd	-0.38289	9.71893	0.615287	1
bta-miR-7858	0.704845	4.1412	0.619005	1
bta-miR-6527	1.50638	2.37007	0.620875	1
bta-miR-2285da	-0.378995	9.75908	0.622726	1
bta-miR-11985	1.28576	1.13897	0.623591	1
bta-miR-99a-5p	0.27122	9.22834	0.626759	1
bta-miR-99a-3p	1.31199	0.648713	0.632841	1
bta-miR-190a	-0.783756	4.3028	0.634554	1
bta-miR-2285j	-0.25749	11.7347	0.635566	1
bta-miR-378	-0.755664	3.50918	0.636604	1
bta-miR-31	1.0987	2.06607	0.639144	1
bta-miR-423-5p	-0.34543	10.8228	0.639705	1
bta-miR-6120-3p	0.711808	4.44797	0.639727	1
bta-miR-9851	-1.03371	2.60542	0.641555	1
bta-miR-25	0.250849	10.0449	0.642399	1
bta-miR-2284ab	0.725045	3.36481	0.643199	1
bta-miR-6119-5p	-0.557861	5.16279	0.643882	1
bta-miR-361	0.42605	9.09071	0.644448	1
bta-miR-125a	-0.177097	12.9854	0.645411	1
bta-miR-206	1.12472	8.83825	0.648118	1
bta-miR-2285bn	-0.342481	7.12893	0.648564	1
bta-miR-204	0.27578	8.25243	0.652656	1
bta-miR-1468	-0.359456	5.81532	0.655488	1
bta-miR-23a	0.213498	11.8164	0.656066	1
bta-miR-2285ca	0.988726	1.51035	0.656175	1
bta-miR-19b	0.485912	6.89862	0.659505	1
bta-miR-2285q	0.933078	2.09829	0.663869	1
bta-miR-199a-3p	-0.992417	1.77903	0.665215	1
bta-miR-2285ba	-0.505945	3.0197	0.665371	1
bta-miR-22-3p	-0.340044	6.22541	0.665475	1
bta-miR-3604	-0.992512	1.77903	0.666278	1
bta-miR-194	0.339157	5.82075	0.668053	1
bta-miR-1343-5p	-0.868769	3.93442	0.669716	1
bta-miR-194b-3p	-1.53778	0.757407	0.672411	1
bta-miR-2285aa	-0.694076	2.41879	0.672735	1
bta-miR-2285al-5p	0.479637	3.11062	0.673882	1
bta-miR-1284	1.15518	0.954245	0.67994	1
bta-miR-339b	-0.454657	7.3997	0.680408	1
bta-miR-1264	-1.08765	2.06599	0.683229	1
bta-miR-1307	0.737734	7.73163	0.684879	1
bta-miR-194b	-1.51767	1.04418	0.684919	1
bta-miR-9-5p	0.436422	6.80215	0.685255	1
bta-miR-2285bc	-0.501398	2.54241	0.686852	1
bta-miR-187	-0.94778	1.53608	0.693791	1
bta-miR-449b	-0.653109	-0.203941	0.695492	1
bta-miR-146b	0.627653	5.17543	0.696188	1
bta-miR-760-3p	0.899344	2.64919	0.697165	1
bta-miR-183	0.22532	11.3039	0.697423	1
bta-miR-2285cl	-0.943691	2.77502	0.697932	1
bta-miR-1296	0.594762	4.54006	0.697942	1
bta-miR-12014	-0.734017	1.69961	0.704399	1
bta-miR-2285ac	-0.452245	-0.33112	0.70591	1
bta-miR-2358	-0.566744	8.23384	0.707202	1
bta-miR-191b	0.854975	1.29034	0.708793	1
bta-miR-101	0.300854	6.71736	0.713719	1
bta-miR-2889	-0.558417	10.2854	0.714481	1
bta-miR-30c	0.338039	7.62863	0.718655	1
bta-miR-2467-3p	-0.867624	7.27328	0.719107	1
bta-miR-11976	-0.488367	5.94212	0.72146	1
bta-miR-1298	-0.213559	8.78229	0.72401	1
bta-miR-2411-3p	1.43641	0.958254	0.72743	1
bta-miR-574	-0.330685	9.67949	0.730119	1
bta-miR-362-5p	-0.575088	4.85764	0.733322	1
bta-miR-2284h-5p	0.56507	0.64632	0.735471	1
bta-miR-27a-3p	0.535414	8.58467	0.737019	1
bta-miR-30a-5p	0.132811	11.9877	0.743912	1
bta-miR-1260b	0.398469	9.77782	0.744177	1
bta-miR-2284y	-0.527657	3.39611	0.748025	1
bta-miR-6526	0.320322	5.29673	0.74821	1
bta-miR-421	0.371906	5.19287	0.748569	1
bta-miR-454	0.91388	2.2086	0.750173	1
bta-miR-2361	-1.02102	1.75821	0.751085	1
bta-miR-30f	0.21042	8.05722	0.751498	1
bta-miR-1249	-0.699307	2.68181	0.752595	1
bta-miR-30e-5p	0.186006	10.8608	0.754061	1
bta-miR-126-3p	0.494025	6.2274	0.754174	1
bta-miR-195	0.418805	3.97777	0.76263	1
bta-miR-2312	-0.679718	-0.506934	0.763278	1
bta-miR-2284j	-0.679007	-0.506934	0.764193	1
bta-miR-210	-0.384471	5.79045	0.767809	1
bta-miR-100	0.180502	10.4447	0.775467	1
bta-miR-2284x	-0.28554	6.98914	0.777067	1
bta-miR-1839	-0.247641	6.75697	0.777955	1
bta-miR-218	-0.517339	3.74817	0.78101	1
bta-miR-532	0.251782	6.63895	0.788448	1
bta-miR-423-3p	-0.19317	7.36646	0.789563	1
bta-miR-2285cm	-0.278585	3.80395	0.793403	1
bta-miR-150	0.552606	3.5124	0.793988	1
bta-miR-2285r	-0.227334	4.62171	0.801098	1
bta-miR-345-3p	0.436883	3.97465	0.801853	1
bta-miR-24-3p	0.259426	7.0158	0.813348	1
bta-miR-103	-0.118988	11.7249	0.814311	1
bta-miR-6119-3p	-0.53498	3.26921	0.817918	1
bta-miR-15b	0.265669	8.11657	0.818992	1
bta-miR-340	-0.673482	1.72588	0.820137	1
bta-miR-2285b	0.459115	2.48631	0.824938	1
bta-miR-874	-0.4645	2.65214	0.825254	1
bta-miR-29a	0.0964918	10.9608	0.825965	1
bta-miR-425-3p	0.437085	3.22323	0.827747	1
bta-miR-11988	0.527712	6.71597	0.829907	1
bta-miR-484	-0.433376	3.78333	0.832614	1
bta-miR-151-3p	0.150077	10.3866	0.833438	1
bta-miR-34c	0.170374	7.75461	0.834804	1
bta-miR-193a-5p	-0.239315	5.05037	0.836608	1
bta-miR-148b	0.120641	9.30932	0.837048	1
bta-miR-2285c	0.545435	0.133454	0.838954	1
bta-miR-2483-5p	-0.473654	2.11996	0.840894	1
bta-miR-504	-0.23648	5.77584	0.842556	1
bta-miR-320b	-0.43553	-0.7194	0.845219	1
bta-miR-2285cq	0.160991	6.60013	0.845503	1
bta-miR-664b	0.60175	2.46874	0.850811	1
bta-miR-2887	-0.603581	0.243423	0.852059	1
bta-miR-7	0.133241	11.7974	0.853909	1
bta-miR-192	0.184607	6.56345	0.854203	1
bta-miR-181a	0.181214	8.53602	0.855497	1
bta-miR-29d-5p	0.138723	7.3989	0.855687	1
bta-miR-2285dl-3p	-0.292389	2.41296	0.858143	1
bta-miR-455-3p	0.590343	0.243703	0.863419	1
bta-miR-11971	0.568884	2.05269	0.868389	1
bta-miR-11995	0.519533	0.579651	0.872704	1
bta-miR-425-5p	0.200284	4.44736	0.87484	1
bta-miR-30d	0.0590939	13.8849	0.877257	1
bta-miR-7859	-0.260312	3.15555	0.878386	1
bta-miR-328	-0.116852	6.16604	0.882389	1
bta-miR-2285dc	-0.222221	1.12315	0.88391	1
bta-miR-11978	0.317083	4.44957	0.885067	1
bta-miR-7865	-0.273328	1.05128	0.887558	1
bta-miR-1251	0.225638	4.00853	0.888648	1
bta-miR-2285au	-0.171986	3.39988	0.89046	1
bta-let-7a-3p	-0.352897	2.95236	0.890927	1
bta-miR-185	-0.0991489	6.28223	0.896156	1
bta-miR-33a	-0.354199	2.62786	0.896796	1
bta-miR-27a-5p	-0.339335	1.23449	0.897398	1
bta-miR-1306	0.108553	5.84323	0.900879	1
bta-let-7e	0.0516937	11.3173	0.902945	1
bta-miR-149-5p	0.293796	2.23545	0.910364	1
bta-miR-11993	0.377544	1.76654	0.910645	1
bta-miR-140	0.0864269	6.85014	0.910855	1
bta-miR-2284m	0.151914	0.791941	0.911912	1
bta-miR-34b	-0.202144	1.53759	0.91615	1
bta-miR-2285bo	-0.154315	1.63711	0.916515	1
bta-miR-3613a	-0.229624	2.65313	0.918986	1
bta-miR-152	-0.0642327	8.40656	0.920855	1
bta-miR-29d-3p	-0.123334	3.89129	0.922263	1
bta-miR-2284w	-0.151351	4.33484	0.92674	1
bta-miR-669	-0.0575469	8.43731	0.930145	1
bta-miR-2340	0.119644	8.99787	0.933166	1
bta-miR-342	0.0367572	11.6148	0.933463	1
bta-miR-10185-5p	-0.154222	1.09158	0.933646	1
bta-miR-2284v	0.240526	-0.103636	0.935193	1
bta-miR-2284c	0.238782	0.288198	0.936867	1
bta-miR-28	0.179686	2.79168	0.941683	1
bta-miR-507-3p	0.232079	1.25437	0.944996	1
bta-miR-507b	0.156672	2.61664	0.947064	1
bta-miR-500	0.133814	2.52394	0.947413	1
bta-miR-7857-5p	-0.216195	0.605396	0.950143	1
bta-miR-221	0.0339808	10.212	0.952482	1
bta-miR-744	-0.0485931	5.83159	0.954979	1
bta-miR-2284aa	-0.0689259	3.95942	0.957071	1
bta-miR-2285y	-0.0689426	3.95942	0.957146	1
bta-miR-3432a	0.0273326	10.0839	0.957175	1
bta-miR-7180	0.187691	1.26966	0.957993	1
bta-miR-2285at	-0.053286	5.4129	0.960092	1
bta-miR-2285t	0.124248	2.90351	0.962798	1
bta-miR-2285bl	-0.0946194	2.62932	0.965002	1
bta-miR-331-3p	0.045347	5.01281	0.967134	1
bta-miR-2483-3p	-0.0956784	3.39714	0.967784	1
bta-miR-346	0.108788	0.492262	0.968603	1
bta-miR-99b	-0.0170654	10.4038	0.971553	1
bta-miR-3431	-0.0278785	9.05453	0.971729	1
bta-miR-2285bv	0.0175417	8.75251	0.979214	1
bta-miR-2285aw	-0.0351443	-0.123477	0.979601	1
bta-miR-186	0.0120928	8.98598	0.983158	1
bta-miR-2284n	0.0135941	8.73923	0.983873	1
bta-miR-2284z	-0.00994704	8.89305	0.988056	1
bta-miR-2285e	0.0297527	2.38548	0.990276	1
bta-miR-191	-0.00362147	12.3969	0.993083	1
bta-miR-335	0.0106627	5.75447	0.993613	1
bta-miR-660	-0.00661885	7.02946	0.994218	1
bta-miR-148c	-0.00444878	7.90786	0.994887	1
bta-miR-22-5p	0.00851856	3.13946	0.997403	1
bta-miR-34a	-0.00238601	4.68306	0.998657	1
bta-miR-760-5p	0	0.852864	1	1
bta-miR-2373-5p	0	0.91029	1	1
bta-miR-2409	0	5.68053	1	1
bta-miR-2441	0	4.028	1	1
bta-miR-2454-5p	0	-0.100869	1	1
bta-miR-3613b	0	0.516677	1	1
bta-miR-1842	0	2.50311	1	1
bta-miR-12025	0	3.28621	1	1
bta-miR-12055	0	-0.112035	1	1
bta-miR-12061	0	1.48976	1	1
bta-miR-12062	0	2.10141	1	1

## Sheet: E-EVsvs other SEC
	logFC	logCPM	PValue	FDR
bta-miR-2898	-7.74417	16.1598	2.33789e-47	9.93603e-45
bta-miR-23b-3p	-5.80041	11.636	5.195e-47	1.10394e-44
bta-miR-23a	-5.23217	11.818	6.40102e-42	9.06811e-40
bta-miR-10174-3p	-5.46014	11.6626	4.04443e-41	4.29721e-39
bta-miR-205	-4.79492	11.782	3.93779e-34	3.34712e-32
bta-miR-11987	-8.1129	12.017	2.25094e-32	1.59442e-30
bta-miR-1	-7.13781	12.8184	9.06164e-30	5.50171e-28
bta-miR-11980	-7.20091	14.9737	2.94313e-29	1.56354e-27
bta-miR-2388-3p	-7.33965	9.80719	3.87101e-27	1.82798e-25
bta-miR-320a	-4.80696	11.3086	5.3506e-25	2.27401e-23
bta-miR-7	-5.54472	11.7995	5.34163e-24	2.06381e-22
bta-miR-2478	-8.40814	16.6952	2.03252e-22	7.19851e-21
bta-miR-1260b	-8.15632	9.78565	1.79867e-16	5.88028e-15
bta-miR-1777a	-13.0485	7.15788	1.09032e-13	3.3099e-12
bta-miR-769	-7.38463	8.88806	6.19678e-13	1.75575e-11
bta-miR-574	-4.96328	9.6841	2.62589e-12	6.97502e-11
bta-miR-2889	-7.69289	10.2913	6.06915e-10	1.51729e-08
bta-miR-2340	-9.53335	9.00973	2.15255e-09	4.96309e-08
bta-miR-1291	-11.5432	4.1655	2.21879e-09	4.96309e-08
bta-miR-2325c	-8.09934	7.21175	7.79107e-09	1.6556e-07
bta-miR-10167-3p	-7.2707	7.90328	1.12496e-08	2.27671e-07
bta-miR-2407	-11.7884	7.52237	1.41363e-08	2.73087e-07
bta-miR-2285ah-5p	-13.2193	7.02182	1.94259e-08	3.58957e-07
bta-miR-27a-3p	-6.70973	8.59715	4.98788e-08	8.8327e-07
bta-miR-1246	-4.15507	10.1632	7.78769e-08	1.32391e-06
bta-miR-11997	-9.15095	4.61058	1.46546e-07	2.39546e-06
bta-miR-2358	-7.18868	8.2527	1.70111e-07	2.67767e-06
bta-miR-12058	-9.04217	9.4468	2.69715e-07	4.09388e-06
bta-miR-184	-5.32199	9.59995	3.24795e-07	4.75993e-06
bta-miR-107	-5.39826	7.97992	5.49292e-07	7.78164e-06
bta-miR-2409	-14.7476	5.78112	8.67107e-07	1.18878e-05
bta-miR-1307	-6.61461	7.77149	1.3632e-06	1.8105e-05
bta-miR-7865	-9.75967	1.95134	2.53944e-06	3.27049e-05
bta-miR-935	-6.75225	1.26886	3.94611e-06	4.93264e-05
bta-miR-361	-3.12271	9.09967	4.65437e-06	5.65173e-05
bta-miR-143	-13.8777	4.27562	8.04023e-06	9.49194e-05
bta-miR-12019	-11.1647	-0.636952	1.06506e-05	0.000122338
bta-miR-15b	-3.5372	8.13182	2.83302e-05	0.000316851
bta-miR-181a	-3.13042	8.5473	2.94819e-05	0.000321277
bta-miR-12061	-10.3657	2.50075	3.15425e-05	0.000335139
bta-miR-2900	-9.33523	-0.711721	3.65189e-05	0.000378549
bta-miR-141	2.29364	12.0886	5.46387e-05	0.000552891
bta-miR-223	-7.04199	7.71737	5.90259e-05	0.000583395
bta-miR-2436-3p	-8.42428	6.1292	6.65979e-05	0.000643275
bta-miR-346	-11.0678	1.14145	8.33435e-05	0.000787133
bta-miR-200b	1.91335	12.2934	9.03406e-05	0.000834669
bta-miR-181b	-5.77669	7.30083	0.000118876	0.00107312
bta-miR-12057	-7.67398	7.40566	0.000121769	0.00107312
bta-miR-2467-3p	-10.8887	7.30626	0.000123725	0.00107312
bta-miR-206	-8.10637	8.84795	0.000136701	0.00116196
bta-miR-11984	-10.1707	1.76913	0.000167304	0.0013942
bta-miR-342	1.74982	11.6145	0.000180552	0.00147567
bta-miR-2285dd	-2.09069	9.72001	0.000275241	0.00220712
bta-miR-16b	-2.554	8.7853	0.000282685	0.00221867
bta-miR-2442	-6.703	-0.4575	0.000287122	0.00221867
bta-miR-2285da	-2.04824	9.76011	0.000397898	0.00301976
bta-miR-2348	-10.0661	6.89896	0.00041624	0.00310354
bta-miR-196a	-2.89893	8.16246	0.000484881	0.00350137
bta-miR-10a	1.07061	14.842	0.000486073	0.00350137
bta-miR-326	-9.69449	0.173974	0.000517354	0.00366459
bta-miR-2454-5p	-8.30011	0.502398	0.000551804	0.00384454
bta-miR-200a	1.25172	15.048	0.000685359	0.00469802
bta-miR-26c	1.36513	12.8629	0.000735187	0.00495959
bta-miR-320b	-9.4953	-0.363752	0.000747029	0.00496074
bta-miR-2887	-11.521	0.610191	0.000766603	0.00501241
bta-miR-2436-5p	-6.05106	2.40679	0.000863473	0.00556024
bta-miR-1298	2.31798	8.78011	0.000937975	0.00594984
bta-miR-30a-5p	1.3323	11.9875	0.00110227	0.00688918
bta-miR-10175-3p	-6.63273	6.63297	0.00126685	0.00780308
bta-miR-135a	2.331	10.1563	0.00133383	0.00809823
bta-miR-29a	1.47006	10.9604	0.00139334	0.00834043
bta-miR-2305	-6.40457	2.18622	0.00154892	0.00914295
bta-miR-29c	1.42438	12.1853	0.00169408	0.00986282
bta-miR-4286	-9.59622	-0.510702	0.00186597	0.0107167
bta-miR-2284r	-9.01715	1.42188	0.00253073	0.0143408
bta-miR-93	2.12848	8.01676	0.00410542	0.0229579
bta-miR-99b	1.40737	10.4033	0.00432562	0.0236905
bta-miR-99a-5p	1.75958	9.22692	0.00434791	0.0236905
bta-miR-1468	11.8021	5.80327	0.0047404	0.0255022
bta-miR-2285j	-1.23633	11.7349	0.00491005	0.0260846
bta-let-7e	1.24137	11.317	0.00512561	0.0268936
bta-miR-125b	0.83288	14.9915	0.00531126	0.0275279
bta-miR-98	-1.83445	9.59635	0.00599952	0.0307204
bta-miR-3431	-1.65517	9.05562	0.00652114	0.0329939
bta-miR-2285cs	-1.17263	11.8444	0.00722916	0.0361458
bta-miR-2285ce	-1.1646	11.8579	0.00734173	0.0362818
bta-miR-2285cc	-1.17074	11.8278	0.00760297	0.037141
bta-miR-2447	-5.44477	4.79867	0.00906498	0.0437797
bta-miR-26b	1.06544	12.979	0.00960993	0.0458901
bta-miR-27b	-1.69537	9.60466	0.00987668	0.0466399
bta-miR-2428	-6.73246	6.75335	0.0100436	0.0469071
bta-miR-186	1.57937	8.98417	0.0102231	0.0470125
bta-miR-25	1.37193	10.0444	0.0102874	0.0470125
bta-miR-6527	-7.76146	3.02477	0.0110096	0.0497775
bta-let-7a-5p	0.660375	17.1336	0.0126253	0.0564816
bta-miR-423-3p	2.17543	7.36068	0.0140887	0.0623717
bta-miR-148c	1.93848	7.90513	0.0143112	0.0627038
bta-miR-11975	-3.03492	5.94579	0.0154094	0.0668266
bta-miR-10b	0.853786	13.8917	0.0179213	0.0769349
bta-miR-12036	-6.55632	-0.508655	0.0193345	0.0821716
bta-miR-2284x	3.35713	6.99124	0.0199078	0.0837706
bta-miR-11976	-2.79958	6.02464	0.0203649	0.0848536
bta-miR-200c	0.876822	14.7403	0.0208032	0.0858385
bta-miR-222	2.96083	6.23423	0.0230737	0.0940237
bta-miR-224	1.7653	7.73497	0.0232294	0.0940237
bta-miR-20a	3.0019	6.81199	0.023875	0.0957252
bta-miR-128	2.16141	6.78042	0.0249082	0.0989346
bta-miR-11986b	11.6985	5.31845	0.0253964	0.0997879
bta-miR-2285bv	1.63881	8.75013	0.0255927	0.0997879
bta-miR-2285bf	2.15766	6.93992	0.0261042	0.100857
bta-miR-2284n	1.62696	8.73692	0.0264251	0.100904
bta-miR-95	2.80586	6.72278	0.0269807	0.100904
bta-miR-10185-5p	-4.8313	1.78046	0.0270514	0.100904
bta-miR-3432a	1.212	10.0833	0.027066	0.100904
bta-miR-92a	1.56471	8.87143	0.0286655	0.105938
bta-miR-2284z	1.54955	8.89094	0.0295187	0.10815
bta-miR-335	11.5316	5.74351	0.03264	0.118564
bta-miR-423-5p	-1.27211	10.8236	0.0350387	0.126199
bta-miR-194	2.80208	5.80762	0.0383001	0.136409
bta-miR-100	-1.09595	10.4447	0.0385156	0.136409
bta-let-7d	1.45962	7.83111	0.0398536	0.139492
bta-miR-151-3p	-1.14921	10.3876	0.0400423	0.139492
bta-miR-92b	11.4445	5.00514	0.0512468	0.177072
bta-miR-204	1.34232	8.24934	0.0517481	0.177362
bta-miR-152	1.33775	8.40438	0.0526993	0.179178
bta-miR-452	1.32761	8.35508	0.0566488	0.191077
bta-miR-449a	1.73611	7.72621	0.0640446	0.214322
bta-miR-12059	-6.25854	-0.603487	0.0659615	0.219013
bta-miR-331-3p	10.3914	5.00466	0.0673387	0.221852
bta-miR-669	1.25796	8.43473	0.0688028	0.224932
bta-miR-2285by	1.36394	7.68648	0.0805194	0.261227
bta-miR-29d-5p	1.44912	7.39285	0.0864516	0.276379
bta-miR-2892	10.3021	5.44494	0.0864904	0.276379
bta-miR-32	11.2631	5.24711	0.0895191	0.283922
bta-miR-9-5p	1.91938	6.80533	0.0908629	0.28605
bta-miR-148a	0.61632	14.5468	0.0996966	0.311552
bta-miR-30f	1.08575	8.05483	0.107646	0.333937
bta-miR-16a	-0.608334	12.529	0.108713	0.334805
bta-miR-2888	-4.41573	-0.414843	0.110586	0.338124
bta-miR-146b	10.2315	5.19681	0.113422	0.343368
bta-miR-339a	0.790614	10.6377	0.113917	0.343368
bta-miR-135b	-3.34682	0.320179	0.119014	0.356203
bta-miR-296-3p	-3.23185	3.33258	0.121142	0.359718
bta-miR-2285bn	1.38843	7.12429	0.122348	0.359718
bta-miR-30b-5p	1.05616	7.74208	0.123402	0.359718
bta-miR-2284w	10.2659	4.30614	0.123574	0.359718
bta-miR-183	-0.719868	11.3042	0.134128	0.387784
bta-miR-425-5p	9.76541	4.42655	0.137138	0.393809
bta-miR-101	1.39271	6.71507	0.139543	0.39498
bta-miR-185	1.6347	6.27577	0.140752	0.39498
bta-miR-760-5p	-3.91844	0.968752	0.140915	0.39498
bta-miR-3596	0.394887	17.2925	0.141581	0.39498
bta-let-7b	0.394886	17.2925	0.142193	0.39498
bta-miR-29d-3p	9.66801	3.88784	0.144093	0.39766
bta-miR-125a	0.555771	12.9853	0.150335	0.412208
bta-miR-24-3p	1.57275	7.01398	0.156354	0.425965
bta-miR-1343-5p	10.1233	3.93047	0.15819	0.428222
bta-miR-31	-3.76214	2.10198	0.160253	0.431059
bta-miR-192	1.57989	6.55644	0.163867	0.438009
bta-let-7c	0.531742	14.3257	0.166643	0.442646
bta-miR-19a	9.82595	3.89019	0.17101	0.451424
bta-miR-1251	9.59253	3.98057	0.174776	0.458517
bta-miR-17-5p	2.40515	5.20367	0.176724	0.460439
bta-miR-3600	0.89775	8.53405	0.177675	0.460439
bta-miR-2285aj-5p	0.832372	8.6806	0.179163	0.460517
bta-miR-2285bc	-2.07513	2.55963	0.179873	0.460517
bta-let-7f	0.495983	14.7307	0.183804	0.467764
bta-miR-2285cd	-1.55205	4.06739	0.185469	0.469193
bta-miR-30d	0.443647	13.8849	0.18671	0.469538
bta-miR-2284h-5p	-2.88761	0.673092	0.19738	0.490991
bta-miR-218	9.70922	3.74871	0.198961	0.490991
bta-miR-1839	1.34197	6.75182	0.199653	0.490991
bta-miR-15a	9.57435	3.23069	0.200103	0.490991
bta-miR-652	9.70705	3.91297	0.201018	0.490991
bta-miR-2285be	1.33119	6.34544	0.20389	0.495161
bta-miR-484	9.59148	3.76711	0.207138	0.500192
bta-miR-196b	0.849801	8.10876	0.209899	0.501093
bta-miR-429	-0.677363	11.5202	0.210781	0.501093
bta-miR-6123	9.42979	3.9396	0.211049	0.501093
bta-miR-328	1.26868	6.1643	0.214346	0.506095
bta-miR-2890	-2.32431	2.94751	0.219017	0.513979
bta-miR-2285cm	8.98284	3.80129	0.220104	0.513979
bta-miR-2284y	9.19111	3.36929	0.22534	0.523331
bta-miR-1249	-2.63593	2.75273	0.227788	0.526142
bta-miR-6775	-4.24904	-0.39547	0.236346	0.542958
bta-let-7g	0.646174	9.76484	0.245385	0.560691
bta-miR-34a	9.0198	4.75464	0.254267	0.57481
bta-miR-140	0.953114	6.84832	0.254925	0.57481
bta-miR-12025	-3.54287	3.75521	0.255621	0.57481
bta-miR-29b	-0.737647	9.55204	0.272367	0.609242
bta-miR-132	9.25655	3.05988	0.276542	0.611103
bta-miR-2285f	0.97156	6.96528	0.277556	0.611103
bta-miR-760-3p	-2.65009	2.69408	0.279651	0.611103
bta-miR-2285n	0.579709	11.1702	0.280817	0.611103
bta-let-7a-3p	9.19747	2.94868	0.282854	0.611103
bta-miR-2285al-5p	8.57181	3.08524	0.283424	0.611103
bta-miR-7859	-2.28073	3.17631	0.284647	0.611103
bta-miR-2285dl-3p	8.81115	2.39029	0.284702	0.611103
bta-miR-378	8.79998	3.49939	0.289325	0.617905
bta-miR-2431-5p	-3.95314	0.626787	0.300898	0.637542
bta-miR-2285cq	0.947196	6.59285	0.30152	0.637542
bta-miR-2285dc	-2.37607	1.14986	0.308037	0.648098
bta-miR-532	1.03924	6.63699	0.314376	0.658104
bta-miR-2336	9.15201	2.70846	0.316867	0.658104
bta-miR-22-5p	8.94607	3.11407	0.317438	0.658104
bta-miR-2431-3p	9.0689	2.55312	0.328419	0.677563
bta-miR-106b	8.9353	2.68122	0.333054	0.682773
bta-miR-34c	0.778959	7.75203	0.334157	0.682773
bta-miR-148d	0.919439	6.08845	0.338203	0.687734
bta-miR-2285cl	8.62124	2.75131	0.353141	0.71132
bta-miR-2364	-2.93308	0.930128	0.35315	0.71132
bta-miR-2285e	8.93955	2.36384	0.35882	0.719332
bta-miR-1911	0.76786	6.5325	0.364863	0.728014
bta-miR-202	-2.91299	0.357026	0.369337	0.733496
bta-miR-19b	0.930964	6.89294	0.371264	0.733893
bta-miR-338	8.49711	2.72891	0.377992	0.736782
bta-miR-3065	8.49711	2.72891	0.378031	0.736782
bta-miR-2373-5p	-2.74794	0.980711	0.378698	0.736782
bta-miR-193a-5p	1.43683	5.0401	0.37966	0.736782
bta-miR-2285b	-1.71252	2.50848	0.386145	0.739283
bta-miR-1842	8.56279	2.66167	0.388941	0.739283
bta-miR-664b	8.51224	2.44623	0.389774	0.739283
bta-miR-425-3p	8.1353	3.21179	0.39307	0.739283
bta-miR-96	1.19631	5.86315	0.394144	0.739283
bta-miR-149-5p	8.32902	2.24229	0.396937	0.739283
bta-miR-2285l	7.85434	2.4253	0.400839	0.739283
bta-miR-2285bu	7.94324	1.64261	0.40154	0.739283
bta-miR-874	8.02311	2.62981	0.402398	0.739283
bta-miR-130a	8.40461	4.31234	0.404897	0.739283
bta-miR-146a	0.641207	8.00229	0.411076	0.739283
bta-let-7i	-0.467882	11.4455	0.412964	0.739283
bta-miR-22-3p	0.755081	6.21964	0.412973	0.739283
bta-miR-2285x	7.7654	2.38924	0.414531	0.739283
bta-miR-2285t	8.24593	2.88097	0.414887	0.739283
bta-miR-33a	8.25832	2.61051	0.418196	0.739283
bta-miR-6523a	-2.45183	2.13686	0.41824	0.739283
bta-miR-2304	8.18713	2.47123	0.418374	0.739283
bta-miR-628	8.26851	2.44101	0.419066	0.739283
bta-miR-155	1.27386	5.07368	0.41938	0.739283
bta-miR-151-5p	0.681423	6.70982	0.420287	0.739283
bta-miR-2455	8.67273	1.97894	0.420784	0.739283
bta-miR-2285q	-2.03349	2.09656	0.420956	0.739283
bta-miR-324	7.82368	4.00004	0.424479	0.742401
bta-miR-6522	8.58618	2.29768	0.428437	0.746253
bta-miR-2419-5p	0.910028	5.58218	0.432755	0.746997
bta-miR-2285bh	7.87294	1.75875	0.435946	0.746997
bta-miR-499	8.04125	1.78617	0.442317	0.746997
bta-miR-2285av	7.7142	1.67425	0.443119	0.746997
bta-miR-12030	-1.6101	2.93249	0.443444	0.746997
bta-miR-340	8.0547	1.70586	0.443627	0.746997
bta-miR-339b	0.863038	7.39767	0.445266	0.746997
bta-miR-2483-3p	7.7873	3.39923	0.445616	0.746997
bta-miR-2483-5p	7.9681	2.10364	0.447799	0.746997
bta-miR-12062	-2.53253	2.67683	0.447851	0.746997
bta-miR-2285ca	7.79264	1.49255	0.449382	0.746997
bta-miR-34b	7.71477	1.51669	0.449956	0.746997
bta-miR-2285bl	7.7455	2.60753	0.451959	0.747403
bta-miR-29e	-1.27489	3.36023	0.453745	0.747448
bta-miR-345-3p	7.679	4.17818	0.455966	0.748207
bta-miR-2448-3p	-1.89668	2.49502	0.462166	0.755463
bta-miR-2361	8.04843	1.77951	0.463972	0.75551
bta-miR-2285p	-1.63398	2.72951	0.467625	0.758553
bta-miR-11982	8.04375	4.32262	0.47115	0.761364
bta-miR-9851	7.69093	2.5817	0.479544	0.771992
bta-miR-375	1.03403	5.37263	0.485383	0.774512
bta-miR-148b	0.39012	9.30881	0.48575	0.774512
bta-miR-374b	1.2793	4.69417	0.486576	0.774512
bta-miR-6518	7.39725	3.07448	0.491542	0.779498
bta-miR-411a	7.85683	1.44303	0.497509	0.785388
bta-miR-28	7.42133	2.83589	0.502069	0.785388
bta-miR-11985	7.52734	1.15135	0.5029	0.785388
bta-miR-2285ct	7.77492	2.08246	0.50291	0.785388
bta-miR-211	7.14731	1.3953	0.504497	0.785388
bta-miR-2285r	-0.792858	4.6222	0.514311	0.797746
bta-miR-365-3p	7.27288	2.09384	0.517729	0.79876
bta-miR-153	7.43552	1.68785	0.518724	0.79876
bta-miR-195	1.12438	3.95997	0.522381	0.799869
bta-miR-2285cp	7.14644	1.19728	0.523474	0.799869
bta-miR-497	7.7062	1.28958	0.52509	0.799869
bta-miR-6526	1.02135	5.28944	0.530718	0.805554
bta-miR-374a	0.765687	6.46169	0.53925	0.814414
bta-miR-190a	-0.949967	4.29438	0.540927	0.814414
bta-miR-7180	7.68854	1.26648	0.542618	0.814414
bta-miR-2284k	0.486364	7.09881	0.545598	0.814414
bta-miR-10179-5p	6.95791	3.5074	0.548263	0.814414
bta-miR-30c	0.542973	7.62687	0.553696	0.814414
bta-miR-194b	7.30141	1.05988	0.554217	0.814414
bta-miR-1264	7.00718	2.07022	0.554838	0.814414
bta-miR-2285dg	6.72233	1.93128	0.559809	0.814414
bta-miR-11993	7.05446	1.74658	0.561758	0.814414
bta-miR-2285bb	6.82095	1.47176	0.563137	0.814414
bta-miR-199a-3p	7.09994	1.77494	0.564525	0.814414
bta-miR-3604	7.09998	1.77494	0.564562	0.814414
bta-miR-2441	6.92695	4.35322	0.564674	0.814414
bta-miR-2285ba	-1.05113	3.05161	0.566953	0.814414
bta-miR-2285bj	6.65368	1.22907	0.567215	0.814414
bta-miR-1777b	6.79625	0.56846	0.575042	0.821222
bta-miR-507-3p	7.31056	1.24359	0.575822	0.821222
bta-miR-2285ad	6.63717	1.92331	0.58239	0.826101
bta-miR-182	0.270717	11.3231	0.584354	0.826101
bta-miR-3613a	-1.297	2.83519	0.585074	0.826101
bta-miR-6119-3p	-1.09984	3.29599	0.593461	0.834196
bta-miR-6528	6.63855	1.9734	0.597873	0.834196
bta-miR-877	6.55688	1.58057	0.598748	0.834196
bta-miR-217	6.88827	0.93779	0.598751	0.834196
bta-miR-12014	6.46584	1.75054	0.603556	0.834196
bta-miR-11995	6.79635	0.599751	0.603604	0.834196
bta-miR-2284m	6.36963	0.781473	0.604547	0.834196
bta-miR-345-5p	6.42608	2.60077	0.608961	0.836561
bta-miR-2285cb	6.31436	4.10355	0.610197	0.836561
bta-miR-194b-3p	6.89791	0.777123	0.614522	0.838226
bta-miR-99a-3p	6.62123	0.666715	0.615357	0.838226
bta-miR-301a	6.58299	1.15528	0.618713	0.840105
bta-miR-507b	-1.20064	2.6192	0.628407	0.847485
bta-miR-500	6.24682	2.52401	0.632068	0.847485
bta-miR-1306	0.476519	5.84008	0.635944	0.847485
bta-miR-2411-3p	6.55748	0.96728	0.639305	0.847485
bta-miR-2284d	0.330691	7.9469	0.639878	0.847485
bta-miR-378c	6.26313	1.21154	0.640367	0.847485
bta-miR-660	0.408543	7.02536	0.641289	0.847485
bta-miR-12055	6.28863	-0.0916501	0.641963	0.847485
bta-miR-187	6.17472	1.54934	0.646507	0.847485
bta-miR-2285bo	6.00637	1.95458	0.647275	0.847485
bta-miR-137	6.55045	0.564323	0.647845	0.847485
bta-miR-2443	-1.00604	3.76981	0.648077	0.847485
bta-miR-1296	0.836372	4.54974	0.651473	0.849313
bta-miR-2285cw	6.23686	0.229798	0.656748	0.85051
bta-miR-2285bq	5.97459	1.0425	0.657365	0.85051
bta-miR-6119-5p	0.640791	5.16878	0.659524	0.85051
bta-miR-2284c	6.15058	0.311093	0.660396	0.85051
bta-miR-362-5p	0.837533	4.84593	0.670078	0.860372
bta-miR-421	0.567545	5.17968	0.679154	0.869205
bta-miR-30e-5p	-0.204679	10.8607	0.682446	0.869205
bta-miR-2285aa	5.67123	2.42164	0.684216	0.869205
bta-miR-1284	5.91149	1.057	0.685138	0.869205
bta-miR-21-5p	0.185907	13.7808	0.69612	0.878531
bta-miR-122	-0.996552	2.99302	0.700598	0.878531
bta-miR-11978	5.60326	4.70241	0.700833	0.878531
bta-miR-365-5p	5.63045	-0.138126	0.701519	0.878531
bta-miR-2285cr	5.45665	0.521786	0.704281	0.878531
bta-miR-103	-0.16127	11.7248	0.706061	0.878531
bta-miR-2284o	5.5763	-0.274285	0.706959	0.878531
bta-miR-767	5.60946	4.76848	0.711565	0.879242
bta-miR-6517	5.52548	3.09706	0.711905	0.879242
bta-miR-2411-5p	5.51837	0.983175	0.715321	0.879242
bta-miR-2285as	5.34515	-0.0453503	0.716087	0.879242
bta-miR-454	-1.0496	2.20696	0.717875	0.879242
bta-miR-11971	-1.03483	2.09033	0.723905	0.884079
bta-miR-2285aw	5.17823	-0.135395	0.730326	0.888364
bta-miR-2285di	-0.597671	3.74258	0.735276	0.888364
bta-miR-545-5p	5.25493	0.13821	0.737079	0.888364
bta-miR-190b	5.28286	0.0823902	0.740299	0.888364
bta-miR-215	5.21749	0.971588	0.740613	0.888364
bta-miR-27a-5p	5.16617	1.21681	0.740877	0.888364
bta-miR-105a	5.15644	3.66321	0.744055	0.888364
bta-miR-7857-5p	5.19021	0.593514	0.744136	0.888364
bta-miR-3432b	4.98741	0.128738	0.747007	0.889294
bta-miR-6529a	0.259825	6.88413	0.755487	0.893193
bta-miR-502a	0.593789	4.52673	0.756313	0.893193
bta-miR-10172-3p	5.06039	0.162239	0.756587	0.893193
bta-miR-2285at	0.394117	5.44586	0.764892	0.900496
bta-miR-2382-3p	4.8736	2.987	0.768454	0.900706
bta-miR-2285bz	4.78886	0.908336	0.769309	0.900706
bta-miR-2285au	-0.5279	3.3846	0.773102	0.90266
bta-miR-2284v	4.79692	-0.104122	0.775608	0.903105
bta-miR-2285ae	4.60343	0.593365	0.779179	0.904746
bta-miR-221	-0.134917	10.2119	0.781629	0.904746
bta-miR-2285cf	4.56318	1.32536	0.783404	0.904746
bta-miR-11988	-0.697515	6.77704	0.790694	0.91069
bta-miR-129-5p	4.4734	1.0749	0.795502	0.911322
bta-miR-129	4.47325	1.0749	0.79553	0.911322
bta-miR-2285ac	4.17567	-0.341407	0.809601	0.924947
bta-miR-449b	3.96288	-0.219607	0.824269	0.938885
bta-miR-1584-5p	3.9529	-0.176177	0.827837	0.938885
bta-miR-7858	0.45176	4.1237	0.828428	0.938885
bta-miR-149-3p	0.605911	3.33201	0.834097	0.942655
bta-miR-2346	-0.551799	2.93928	0.837217	0.942655
bta-miR-2285i	3.68081	1.2753	0.841992	0.942655
bta-miR-2410	-0.746296	2.23266	0.843481	0.942655
bta-miR-11972	0.355221	4.1319	0.846552	0.942655
bta-miR-2285y	-0.379613	3.93963	0.847194	0.942655
bta-miR-2284aa	-0.379544	3.93963	0.84728	0.942655
bta-miR-11996	3.55339	-0.973755	0.853966	0.947613
bta-miR-210	0.237731	5.78706	0.860045	0.951872
bta-miR-2285de	-0.135613	6.93836	0.863224	0.95291
bta-miR-2285c	3.06729	0.112961	0.874745	0.963126
bta-miR-2285ao	3.04649	1.72556	0.877127	0.963254
bta-miR-504	-0.165342	5.77922	0.88912	0.971739
bta-miR-2285db	2.71049	0.697697	0.889427	0.971739
bta-miR-491	-0.278727	3.90881	0.895913	0.975613
bta-miR-197	0.168249	5.80974	0.897564	0.975613
bta-miR-11989	2.37338	1.77405	0.905815	0.979733
bta-miR-6120-3p	0.199562	4.441	0.905964	0.979733
bta-miR-483	2.18529	4.28186	0.912657	0.983174
bta-miR-10182-5p	1.96361	0.54276	0.919665	0.983174
bta-miR-150	-0.219456	3.50936	0.92415	0.983174
bta-miR-12034	1.80695	0.398803	0.924928	0.983174
bta-miR-126-5p	0.224482	3.11305	0.925028	0.983174
bta-miR-2284ab	-0.201033	3.37353	0.927412	0.983174
bta-miR-11992	1.82216	0.412896	0.928549	0.983174
bta-miR-2312	1.69367	-0.513769	0.929962	0.983174
bta-miR-2284j	1.69351	-0.513769	0.929966	0.983174
bta-miR-191b	1.54567	1.2786	0.939471	0.989588
bta-miR-191	-0.0278826	12.3968	0.940783	0.989588
bta-miR-744	0.0680115	5.82981	0.946829	0.989588
bta-miR-2285co	1.056	0.168492	0.950782	0.989588
bta-miR-2285ap	0.987458	0.460131	0.952399	0.989588
bta-miR-671	0.930796	1.43983	0.953702	0.989588
bta-miR-18b	0.898527	3.93579	0.954466	0.989588
bta-miR-12056	0.855724	2.81425	0.955654	0.989588
bta-miR-3613b	0.811849	0.882254	0.95699	0.989588
bta-miR-11986c	0.060448	3.24858	0.983442	1
bta-miR-126-3p	-0.00971773	6.26941	0.995308	1
bta-miR-127	0	0.321059	1	1
bta-miR-139	0	1.04929	1	1
bta-miR-455-3p	0	0.242027	1	1
bta-miR-130b	0	2.13653	1	1
bta-miR-181d	0	0.232269	1	1
bta-miR-2354	0	0.480979	1	1
bta-miR-1247-5p	0	-0.738203	1	1
bta-miR-1247-3p	0	2.25718	1	1
bta-miR-2285u	0	0.339188	1	1
bta-miR-2285ar	0	0.45	1	1
bta-miR-2285bi	0	0.437467	1	1
bta-miR-2285cj	0	0.838177	1	1

## Sheet: SPvsSPE SEC
	logFC	logCPM	PValue	FDR
bta-miR-2478	-4.22577	16.6951	1.91402e-10	8.13459e-08
bta-miR-197	-6.87524	5.79749	9.88403e-10	2.10036e-07
bta-miR-2898	-2.65792	16.1597	2.10512e-08	2.98225e-06
bta-miR-374b	-7.5745	4.70229	6.86071e-08	7.2895e-06
bta-miR-6123	-10.3709	3.95495	2.88207e-06	0.000244976
bta-miR-181b	-11.4143	7.27224	7.76238e-06	0.000549835
bta-miR-2285r	4.5165	4.62171	2.10931e-05	0.00126621
bta-miR-32	-11.915	5.22322	2.61975e-05	0.00126621
bta-miR-2284ab	-10.6813	3.36481	2.68138e-05	0.00126621
bta-miR-2443	-9.73962	3.78423	3.8713e-05	0.0016453
bta-miR-2340	-8.57526	8.99787	0.000151758	0.00586338
bta-miR-7858	-7.29698	4.1412	0.000232404	0.00809232
bta-miR-2284aa	-6.04416	3.95942	0.000259901	0.00809232
bta-miR-2285y	-6.04446	3.95942	0.00026657	0.00809232
bta-miR-12057	-10.0462	7.37542	0.000426822	0.011351
bta-miR-324	-8.88662	3.9803	0.000427332	0.011351
bta-miR-34a	-6.57246	4.68306	0.00051145	0.0127862
bta-miR-126-5p	-9.94642	3.12191	0.000671338	0.015851
bta-miR-378	-6.43113	3.50918	0.0020732	0.0463743
bta-miR-19a	-5.98178	3.90456	0.00246868	0.0524595
bta-miR-11986c	8.85579	3.21549	0.00285086	0.0576959
bta-miR-2285p	-7.34555	2.73313	0.00313012	0.0604682
bta-miR-296-3p	8.66927	3.28325	0.00328153	0.060637
bta-miR-9851	-9.27151	2.60542	0.00383921	0.0679861
bta-miR-12014	-7.78502	1.69961	0.00443962	0.0732365
bta-miR-10185-5p	-6.81727	1.09158	0.00453241	0.0732365
bta-miR-1249	-9.05298	2.68181	0.00465267	0.0732365
bta-miR-125b	0.706455	14.9915	0.00526655	0.0759659
bta-miR-1246	-2.52017	10.1604	0.00532488	0.0759659
bta-miR-218	-6.75445	3.74817	0.0056759	0.0759659
bta-miR-365-5p	-7.20487	-0.265812	0.00574299	0.0759659
bta-miR-2285e	10.3568	2.38548	0.00578302	0.0759659
bta-miR-21-5p	-1.31456	13.7808	0.00613799	0.0759659
bta-miR-760-3p	-9.0241	2.64919	0.00616638	0.0759659
bta-miR-122	-9.30928	3.00216	0.00625602	0.0759659
bta-miR-10179-5p	-8.14244	3.2658	0.00649827	0.0767157
bta-miR-2285av	-5.82601	1.68402	0.00710329	0.0815919
bta-miR-2373-5p	-8.79556	0.91029	0.00810028	0.0905953
bta-miR-628	9.34248	2.44131	0.00946067	0.103097
bta-miR-2285bl	8.33541	2.62932	0.0100048	0.10621
bta-miR-34b	6.58511	1.53759	0.0102462	0.10621
bta-miR-28	-8.65087	2.79168	0.0115722	0.1171
bta-miR-425-3p	6.59657	3.22323	0.0135172	0.1336
bta-miR-12030	4.67259	2.94161	0.014316	0.138279
bta-miR-130a	8.73611	4.12151	0.0148547	0.140294
bta-miR-2285t	9.60383	2.90351	0.0155841	0.143478
bta-miR-2285bh	6.6474	1.77808	0.015867	0.143478
bta-miR-877	-6.99224	1.59309	0.0187862	0.163649
bta-miR-454	-9.35485	2.2086	0.0189167	0.163649
bta-miR-33a	-8.72401	2.62786	0.0192528	0.163649
bta-miR-11980	1.37114	14.9735	0.0208256	0.167211
bta-miR-11985	-8.09845	1.13897	0.0208302	0.167211
bta-miR-11982	-9.62303	4.0883	0.0208523	0.167211
bta-miR-6522	10.051	2.3154	0.0212865	0.167533
bta-miR-106b	-7.95384	2.70231	0.0229019	0.176969
bta-miR-96	-3.09901	5.86571	0.0237029	0.179888
bta-miR-2285n	1.17731	11.1705	0.0245791	0.180507
bta-miR-2285cl	-7.13903	2.77502	0.0249266	0.180507
bta-miR-2467-3p	-6.85024	7.27328	0.0254413	0.180507
bta-miR-2441	-5.77919	4.028	0.0256825	0.180507
bta-miR-153	-6.28333	1.6945	0.025908	0.180507
bta-miR-1264	-7.69464	2.06599	0.0269961	0.185054
bta-miR-2285bz	-6.35022	0.922394	0.0276697	0.186661
bta-miR-2285bu	4.18793	1.66057	0.0287162	0.189937
bta-miR-499	8.68075	1.79723	0.0290491	0.189937
bta-miR-6528	7.82863	1.93788	0.0311781	0.199999
bta-miR-141	-1.11035	12.0889	0.0315292	0.199999
bta-miR-2285cw	-7.8158	0.217437	0.0322777	0.201736
bta-miR-2410	9.81792	2.12247	0.0341935	0.209891
bta-miR-2285bb	-5.1375	1.46985	0.0348687	0.209891
bta-miR-105a	-6.71037	3.22459	0.0351045	0.209891
bta-miR-2483-5p	-6.28009	2.11996	0.0359249	0.209891
bta-miR-12062	-8.03243	2.10141	0.0364019	0.209891
bta-miR-2285dl-3p	3.84866	2.41296	0.0371072	0.209891
bta-miR-2285cp	-5.17504	1.19157	0.0371952	0.209891
bta-miR-29c	0.860364	12.1854	0.0375335	0.209891
bta-miR-12055	-7.19163	-0.112035	0.0396571	0.218887
bta-miR-2285ca	5.78729	1.51035	0.0402707	0.219424
bta-miR-335	-2.92933	5.75447	0.041149	0.221371
bta-miR-27a-5p	-6.75512	1.23449	0.0419025	0.222245
bta-miR-2436-3p	-4.64194	6.05349	0.0423574	0.222245
bta-miR-6120-3p	-3.30469	4.44797	0.0457881	0.237317
bta-miR-149-5p	6.78575	2.23545	0.0481594	0.242164
bta-miR-150	5.00985	3.5124	0.048675	0.242164
bta-miR-507b	-5.80204	2.61664	0.048689	0.242164
bta-miR-6523a	-8.10071	2.12935	0.0491809	0.242164
bta-miR-2285ct	8.6098	2.06986	0.0495725	0.242164
bta-miR-194	1.56195	5.82075	0.0536973	0.259334
bta-miR-507-3p	8.88507	1.25437	0.0550466	0.262863
bta-miR-2284w	3.4667	4.33484	0.0573005	0.270586
bta-miR-2285de	1.43022	6.94131	0.0584908	0.273171
bta-miR-2448-3p	-5.75575	2.48627	0.0602582	0.278367
bta-miR-205	-0.86878	11.7805	0.0672195	0.307186
bta-miR-2284o	-6.34306	-0.276097	0.0683697	0.308213
bta-miR-340	7.08987	1.72588	0.0688946	0.308213
bta-miR-194b-3p	8.46923	0.757407	0.0705549	0.312352
bta-miR-378c	-5.91866	1.18858	0.0729041	0.319425
bta-miR-2284v	-6.36378	-0.103636	0.0737104	0.319662
bta-miR-2285ao	-4.7255	1.74482	0.075811	0.325195
bta-miR-2284c	-6.3644	0.288198	0.0777187	0.325195
bta-miR-411a	8.80765	1.43894	0.0778902	0.325195
bta-miR-194b	8.46905	1.04418	0.0780468	0.325195
bta-miR-1584-5p	5.43156	-0.23617	0.0808243	0.332144
bta-miR-449a	-1.42024	7.73062	0.0812777	0.332144
bta-miR-760-5p	5.28069	0.852864	0.0903584	0.365736
bta-miR-497	-6.64861	1.29193	0.0986063	0.395356
bta-miR-135a	-1.06199	10.1571	0.107025	0.425101
bta-miR-2285bq	-3.37105	1.0471	0.1098	0.432083
bta-miR-2285ad	-2.99406	1.94002	0.11555	0.450538
bta-miR-2285dc	3.88757	1.12315	0.119525	0.461802
bta-miR-2285au	-2.02704	3.39988	0.124237	0.475682
bta-miR-7180	7.05931	1.26966	0.131681	0.499681
bta-miR-30c	-1.43677	7.62863	0.133113	0.500646
bta-miR-11972	2.11012	4.10965	0.136084	0.507331
bta-miR-2436-5p	-3.1803	1.89899	0.13945	0.515358
bta-miR-1343-5p	3.22199	3.93442	0.143155	0.52449
bta-miR-128	-1.07832	6.78615	0.145346	0.527967
bta-miR-107	-2.14516	7.96286	0.149076	0.536925
bta-miR-2285dg	1.94898	1.9497	0.151403	0.540724
bta-miR-11989	-3.67626	1.28397	0.156905	0.555704
bta-miR-345-5p	-3.17675	2.6218	0.159113	0.558867
bta-miR-1468	1.13834	5.81532	0.163464	0.565788
bta-miR-429	-0.904753	11.5199	0.163746	0.565788
bta-miR-146a	-0.883309	8.00281	0.169129	0.579676
bta-miR-135b	-1.80957	0.279367	0.177531	0.60243
bta-miR-2285ac	2.21102	-0.33112	0.178603	0.60243
bta-miR-200c	-0.485154	14.7403	0.185928	0.622202
bta-miR-320a	0.748178	11.3068	0.187593	0.622846
bta-miR-2284d	0.968649	7.948	0.189052	0.622846
bta-miR-12036	-3.1158	-0.746241	0.19066	0.623312
bta-miR-2284x	-1.335	6.98914	0.193194	0.626773
bta-miR-152	0.837986	8.40656	0.198218	0.636477
bta-miR-2388-3p	1.03651	9.79876	0.19918	0.636477
bta-miR-22-3p	1.00295	6.22541	0.205778	0.652655
bta-miR-200b	-0.585372	12.2936	0.211655	0.657954
bta-miR-2285j	0.6763	11.7347	0.215104	0.657954
bta-miR-11978	-3.14416	4.44957	0.21683	0.657954
bta-miR-148c	0.859753	7.90786	0.2191	0.657954
bta-miR-191b	-3.15261	1.29034	0.220263	0.657954
bta-miR-11993	-4.87098	1.76654	0.221454	0.657954
bta-miR-200a	-0.454135	15.048	0.222877	0.657954
bta-miR-11984	-3.17236	1.31081	0.22297	0.657954
bta-miR-2285ce	0.653798	11.8577	0.223371	0.657954
bta-miR-6526	-1.23793	5.29673	0.223526	0.657954
bta-miR-7865	3.21413	1.05128	0.224478	0.657954
bta-miR-3613a	2.99847	2.65313	0.231892	0.674807
bta-miR-149-3p	3.2281	3.29108	0.233404	0.674807
bta-miR-452	0.792082	8.35807	0.235544	0.676393
bta-miR-2285cs	0.635196	11.8442	0.239748	0.683846
bta-miR-2285cc	0.632205	11.8277	0.244822	0.689221
bta-miR-2285b	2.56147	2.48631	0.244876	0.689221
bta-miR-2285cr	1.66199	0.53742	0.24882	0.695714
bta-miR-193a-5p	1.3566	5.05037	0.250805	0.696679
bta-miR-339b	1.25964	7.3997	0.261325	0.72119
bta-miR-345-3p	-2.41714	3.97465	0.264667	0.725701
bta-miR-1291	2.74947	3.7267	0.267118	0.727727
bta-miR-2358	1.59601	8.23384	0.274636	0.743443
bta-miR-449b	-2.21956	-0.203941	0.27719	0.745606
bta-miR-11992	-3.23711	0.398885	0.284784	0.761033
bta-miR-500	-2.37186	2.52394	0.286507	0.761033
bta-miR-3431	0.825549	9.05453	0.297332	0.783977
bta-miR-425-5p	-1.34722	4.44736	0.300469	0.783977
bta-miR-29e	-1.68434	3.34116	0.300678	0.783977
bta-miR-2348	2.69693	6.8549	0.302979	0.785158
bta-miR-3600	0.677874	8.53612	0.30687	0.790422
bta-miR-2483-3p	2.54163	3.39714	0.311304	0.792513
bta-miR-6529a	0.793221	6.88925	0.312267	0.792513
bta-miR-1911	0.766228	6.53597	0.313276	0.792513
bta-miR-2305	-2.0323	1.50237	0.315716	0.79396
bta-miR-2285as	1.80927	-0.0257909	0.324689	0.811723
bta-miR-27b	-0.838631	9.60319	0.329415	0.818721
bta-miR-202	-2.28827	0.338046	0.334098	0.825533
bta-miR-12059	-2.86644	-0.639461	0.33911	0.833073
bta-miR-20a	-1.03613	6.82015	0.345075	0.834127
bta-miR-29b	-0.770936	9.55166	0.345783	0.834127
bta-miR-125a	0.362068	12.9854	0.347334	0.834127
bta-miR-6518	2.28772	3.08489	0.347389	0.834127
bta-miR-483	2.79631	3.95749	0.349487	0.834449
bta-miR-26c	-0.381686	12.863	0.352325	0.836526
bta-miR-2285bc	-1.14979	2.54241	0.361982	0.853178
bta-miR-30a-5p	0.370008	11.9877	0.363354	0.853178
bta-miR-191	0.376507	12.3969	0.368214	0.85984
bta-miR-2312	2.29885	-0.506934	0.373665	0.863608
bta-miR-2284j	2.29892	-0.506934	0.374013	0.863608
bta-miR-2285be	0.758206	6.3527	0.375923	0.863608
bta-miR-2285dd	0.666648	9.71893	0.383274	0.868491
bta-miR-16b	-0.815486	8.78077	0.383404	0.868491
bta-miR-1842	2.7774	2.50311	0.38594	0.868491
bta-miR-2285co	2.01134	0.19256	0.387569	0.868491
bta-miR-2454-5p	-2.18286	-0.100869	0.388266	0.868491
bta-miR-211	-1.1533	1.40693	0.398235	0.881867
bta-miR-206	2.14391	8.83825	0.398396	0.881867
bta-miR-101	-0.690629	6.71736	0.401018	0.88307
bta-miR-34c	0.684817	7.75461	0.404407	0.885944
bta-miR-12034	1.97288	0.417097	0.408734	0.890831
bta-miR-502a	1.30944	4.54131	0.41254	0.894538
bta-miR-6527	2.30084	2.37007	0.415281	0.895042
bta-miR-532	0.767636	6.63895	0.416984	0.895042
bta-miR-92a	-0.53533	8.87274	0.429827	0.917973
bta-miR-29d-3p	0.989974	3.89129	0.437157	0.926007
bta-miR-30e-5p	-0.460162	10.8608	0.439158	0.926007
bta-miR-15a	-1.50233	3.25504	0.440126	0.926007
bta-miR-2325c	1.32886	7.16892	0.444333	0.930253
bta-miR-24-3p	-0.821115	7.0158	0.457385	0.949731
bta-miR-3432a	0.378182	10.0839	0.458192	0.949731
bta-miR-2285i	1.73887	1.29571	0.461194	0.949731
bta-miR-10167-3p	-1.19547	7.87915	0.467184	0.949731
bta-miR-103	0.368119	11.7249	0.468059	0.949731
bta-miR-2285ah-5p	-1.68618	6.9855	0.470199	0.949731
bta-miR-339a	0.370369	10.638	0.470557	0.949731
bta-miR-2431-3p	1.72989	2.57436	0.471513	0.949731
bta-miR-1251	1.16342	4.00853	0.477878	0.958009
bta-miR-181a	-0.701624	8.53602	0.482991	0.962348
bta-miR-362-5p	1.18852	4.85764	0.487146	0.962348
bta-miR-2428	1.8195	6.66954	0.492096	0.962348
bta-miR-2304	2.09244	2.3688	0.495544	0.962348
bta-miR-2285at	0.730016	5.4129	0.496586	0.962348
bta-miR-6119-5p	0.820985	5.16279	0.498152	0.962348
bta-miR-2285ap	1.85473	0.469782	0.49875	0.962348
bta-miR-2285cm	0.731787	3.80395	0.500335	0.962348
bta-miR-210	-0.887187	5.79045	0.500448	0.962348
bta-miR-29d-5p	-0.512608	7.3989	0.503025	0.962348
bta-miR-23a	-0.319848	11.8164	0.50495	0.962348
bta-miR-664b	2.2147	2.46874	0.507868	0.963589
bta-miR-3432b	0.832492	0.140574	0.516188	0.970438
bta-miR-99a-5p	-0.36018	9.22834	0.518773	0.970438
bta-miR-2285bn	0.486114	7.12893	0.51892	0.970438
bta-miR-1298	-0.388989	8.78229	0.520612	0.970438
bta-miR-2361	2.09142	1.75821	0.524133	0.972736
bta-let-7d	-0.418894	7.83341	0.533916	0.985946
bta-miR-132	-1.56728	3.06659	0.535891	0.985946
bta-let-7i	-0.434208	11.4454	0.54136	0.99036
bta-miR-11987	0.397514	12.0153	0.54295	0.99036
bta-miR-2285da	0.451526	9.75908	0.558226	1
bta-miR-2284n	-0.393129	8.73923	0.559816	1
bta-miR-29a	0.248081	10.9608	0.5721	1
bta-miR-15b	-0.657481	8.11657	0.573024	1
bta-miR-190a	0.926662	4.3028	0.574837	1
bta-miR-2285bv	-0.378433	8.75251	0.574952	1
bta-miR-2284z	-0.373006	8.89305	0.575366	1
bta-miR-2346	1.64922	2.95044	0.577347	1
bta-miR-151-5p	0.436788	6.71254	0.582787	1
bta-miR-2284k	0.396104	7.10137	0.589949	1
bta-miR-10174-3p	0.269335	11.6607	0.597215	1
bta-miR-2285bf	0.402391	6.94814	0.597403	1
bta-let-7b	0.102737	17.2925	0.601099	1
bta-miR-3596	0.102737	17.2925	0.601724	1
bta-let-7g	-0.315008	9.76544	0.602172	1
bta-miR-19b	0.557767	6.89862	0.613468	1
bta-miR-16a	-0.228652	12.5289	0.613706	1
bta-miR-484	1.04509	3.78333	0.614525	1
bta-miR-195	-0.695837	3.97777	0.615648	1
bta-miR-2285f	0.405488	6.9712	0.616289	1
bta-miR-744	-0.416269	5.83159	0.63039	1
bta-let-7a-3p	-1.25108	2.95236	0.630583	1
bta-miR-222	0.382721	6.24735	0.634391	1
bta-miR-2285cd	0.416983	4.04364	0.639093	1
bta-miR-2285di	0.504476	3.71669	0.645683	1
bta-miR-23b-3p	0.225049	11.6342	0.656738	1
bta-miR-2285bo	0.671516	1.63711	0.65916	1
bta-miR-1307	0.802823	7.73163	0.660029	1
bta-miR-2285ba	0.518094	3.0197	0.6638	1
bta-miR-151-3p	0.30665	10.3866	0.667668	1
bta-miR-22-5p	1.12593	3.13946	0.670991	1
bta-miR-2285bj	0.540881	1.20887	0.671313	1
bta-miR-11988	1.05127	6.71597	0.673001	1
bta-miR-7	0.303739	11.7974	0.675006	1
bta-miR-361	0.386221	9.09071	0.675635	1
bta-miR-185	0.313582	6.28223	0.680918	1
bta-miR-126-3p	-0.649507	6.2274	0.681782	1
bta-miR-935	-0.703205	0.821966	0.68365	1
bta-let-7f	0.174782	14.7307	0.684412	1
bta-miR-2284y	0.668543	3.39611	0.684768	1
bta-miR-2285cf	0.782924	1.34395	0.688071	1
bta-miR-2336	-1.2427	2.70439	0.688711	1
bta-miR-2284m	-0.553357	0.791941	0.694903	1
bta-miR-12058	-0.826473	9.43621	0.698445	1
bta-miR-148a	0.152616	14.5468	0.699104	1
bta-let-7e	0.16377	11.3173	0.699328	1
bta-miR-11976	-0.507105	5.94212	0.710664	1
bta-miR-196b	-0.264085	8.11043	0.71433	1
bta-miR-223	-0.809245	7.69625	0.716507	1
bta-miR-2285aa	0.586965	2.41879	0.731394	1
bta-miR-574	0.328599	9.67949	0.73189	1
bta-miR-140	-0.25703	6.85014	0.739602	1
bta-miR-1777a	-0.760948	7.12502	0.7402	1
bta-miR-2284h-5p	-0.59061	0.64632	0.741483	1
bta-miR-2892	-0.41822	5.42619	0.742026	1
bta-miR-1260b	0.398881	9.77782	0.742232	1
bta-let-7c	0.13151	14.3257	0.743249	1
bta-miR-365-3p	-0.860991	2.11376	0.745223	1
bta-miR-1	-0.239076	12.8175	0.75561	1
bta-miR-874	0.655045	2.65214	0.756473	1
bta-miR-184	0.407766	9.59288	0.76063	1
bta-miR-2285by	0.215844	7.69006	0.761383	1
bta-miR-26b	0.132733	12.979	0.761494	1
bta-miR-423-5p	-0.221024	10.8228	0.76438	1
bta-miR-221	-0.165372	10.212	0.771949	1
bta-miR-2285ae	-0.483483	0.604306	0.773932	1
bta-miR-375	-0.353534	5.38574	0.775813	1
bta-miR-491	-0.50411	3.92495	0.783122	1
bta-miR-1306	0.236507	5.84323	0.786236	1
bta-miR-769	0.339374	8.87684	0.789944	1
bta-miR-27a-3p	0.423026	8.58467	0.791024	1
bta-miR-1839	-0.228456	6.75697	0.795062	1
bta-miR-10175-3p	0.598845	6.582	0.798083	1
bta-miR-17-5p	-0.356583	5.21702	0.805939	1
bta-miR-2285cb	0.334239	3.76864	0.808216	1
bta-miR-30f	-0.161235	8.05722	0.808416	1
bta-miR-92b	-0.429885	5.01021	0.808902	1
bta-miR-10a	0.0777692	14.842	0.809032	1
bta-miR-374a	0.325105	6.47016	0.813122	1
bta-miR-186	0.130457	8.98598	0.819988	1
bta-miR-100	-0.141558	10.4447	0.82302	1
bta-miR-30b-5p	-0.137527	7.74455	0.833489	1
bta-miR-11971	0.643204	2.05269	0.852	1
bta-miR-2419-5p	-0.17134	5.58324	0.866469	1
bta-miR-2285c	0.473311	0.133454	0.866525	1
bta-miR-224	-0.123804	7.73807	0.867198	1
bta-miR-6119-3p	0.376537	3.26921	0.871035	1
bta-miR-1296	-0.243488	4.54006	0.873402	1
bta-miR-2888	-0.384838	-0.447056	0.875022	1
bta-miR-9-5p	-0.166388	6.80215	0.876895	1
bta-miR-2442	0.326383	-0.649312	0.877268	1
bta-miR-10b	0.0573348	13.8917	0.883927	1
bta-miR-98	-0.122495	9.59271	0.890191	1
bta-miR-148b	0.07961	9.30932	0.892085	1
bta-miR-669	-0.0866259	8.43731	0.895023	1
bta-miR-423-3p	-0.0940699	7.36646	0.896579	1
bta-let-7a-5p	0.0329753	17.1336	0.904194	1
bta-miR-93	0.075699	8.02171	0.905109	1
bta-miR-204	-0.0717069	8.25243	0.906851	1
bta-miR-11986b	0.168146	5.33549	0.90956	1
bta-miR-2285q	0.342861	2.09829	0.912423	1
bta-miR-652	0.228607	3.9289	0.913552	1
bta-miR-2285x	-0.137716	2.40921	0.918096	1
bta-miR-2285aj-5p	0.0612992	8.68204	0.920887	1
bta-miR-3065	-0.262427	2.73215	0.92327	1
bta-miR-338	-0.262418	2.73215	0.923421	1
bta-miR-182	0.0522368	11.3233	0.927155	1
bta-miR-192	0.0895391	6.56345	0.929021	1
bta-miR-148d	-0.0693982	6.0955	0.929719	1
bta-miR-25	-0.0438704	10.0449	0.935243	1
bta-miR-183	-0.0462555	11.3039	0.936354	1
bta-miR-2285l	-0.0888289	2.44635	0.946559	1
bta-miR-95	0.0666618	6.72987	0.949301	1
bta-miR-342	0.0271877	11.6148	0.950757	1
bta-miR-660	-0.0519	7.02946	0.954716	1
bta-miR-421	0.0642651	5.19287	0.955875	1
bta-miR-504	-0.0633602	5.77584	0.957614	1
bta-miR-196a	0.0577442	8.15427	0.958313	1
bta-miR-155	-0.0499593	5.08445	0.961943	1
bta-miR-2285aw	0.0634259	-0.123477	0.96211	1
bta-miR-146b	0.0733406	5.17543	0.963621	1
bta-miR-11975	-0.0583513	5.85193	0.967512	1
bta-miR-2364	0.126498	0.857582	0.969679	1
bta-miR-328	0.0267429	6.16604	0.97298	1
bta-miR-30d	-0.0112556	13.8849	0.976531	1
bta-miR-2889	-0.0437114	10.2854	0.977039	1
bta-miR-2285al-5p	-0.025531	3.11062	0.982308	1
bta-miR-99b	0.00959296	10.4038	0.984009	1
bta-miR-331-3p	-0.0124282	5.01281	0.991037	1
bta-miR-2890	-0.0227824	2.93791	0.991076	1
bta-miR-1777b	0.00295499	0.49961	0.993348	1
bta-miR-2285cq	0.0049893	6.60013	0.995187	1
bta-miR-18b	0	3.43459	1	1
bta-miR-99a-3p	0	0.648713	1	1
bta-miR-199a-3p	0	1.77903	1	1
bta-miR-31	0	2.06607	1	1
bta-miR-127	0	0.338485	1	1
bta-miR-139	0	1.05869	1	1
bta-miR-215	0	0.960905	1	1
bta-miR-545-5p	0	0.153582	1	1
bta-miR-455-3p	0	0.243703	1	1
bta-miR-129	0	1.09503	1	1
bta-miR-129-5p	0	1.09503	1	1
bta-miR-130b	0	1.56935	1	1
bta-miR-137	0	0.584744	1	1
bta-miR-143	0	3.78895	1	1
bta-miR-181d	0	0.25358	1	1
bta-miR-187	0	1.53608	1	1
bta-miR-190b	0	0.103313	1	1
bta-miR-217	0	0.932094	1	1
bta-miR-301a	0	1.17493	1	1
bta-miR-326	0	0.0592555	1	1
bta-miR-346	0	0.492262	1	1
bta-miR-671	0	1.42808	1	1
bta-miR-767	0	4.50721	1	1
bta-miR-1284	0	0.954245	1	1
bta-miR-2354	0	0.468437	1	1
bta-miR-2382-3p	0	2.34315	1	1
bta-miR-2407	0	7.47223	1	1
bta-miR-2409	0	5.68053	1	1
bta-miR-2411-5p	0	0.991268	1	1
bta-miR-2411-3p	0	0.958254	1	1
bta-miR-320b	0	-0.7194	1	1
bta-miR-2431-5p	0	0.615455	1	1
bta-miR-2284r	0	1.37641	1	1
bta-miR-2447	0	4.5495	1	1
bta-miR-2455	0	1.92983	1	1
bta-miR-2887	0	0.243423	1	1
bta-miR-2900	0	-0.962629	1	1
bta-miR-3604	0	1.77903	1	1
bta-miR-4286	0	-0.656106	1	1
bta-miR-6517	0	2.72298	1	1
bta-miR-1247-5p	0	-0.894259	1	1
bta-miR-1247-3p	0	2.22172	1	1
bta-miR-3613b	0	0.516677	1	1
bta-miR-2285u	0	0.352774	1	1
bta-miR-7857-5p	0	0.605396	1	1
bta-miR-7859	0	3.15555	1	1
bta-miR-10172-3p	0	0.185201	1	1
bta-miR-10182-5p	0	0.56204	1	1
bta-miR-2285ar	0	0.459516	1	1
bta-miR-2285bi	0	0.446881	1	1
bta-miR-11995	0	0.579651	1	1
bta-miR-11996	0	-1.03687	1	1
bta-miR-11997	0	4.33522	1	1
bta-miR-6775	0	-0.418654	1	1
bta-miR-2285cj	0	0.855822	1	1
bta-miR-12019	0	-0.902486	1	1
bta-miR-2285db	0	0.717449	1	1
bta-miR-12025	0	3.28621	1	1
bta-miR-12056	0	2.18745	1	1
bta-miR-12061	0	1.48976	1	1

## Sheet: SPvsS SEC 
	logFC	logCPM	PValue	FDR
bta-miR-2478	-4.01457	16.6951	1.00591e-09	4.27511e-07
bta-miR-197	-6.64755	5.79749	2.5708e-09	5.46295e-07
bta-miR-374b	-7.32792	4.70229	1.4547e-07	2.06083e-05
bta-miR-2898	-2.0405	16.1597	1.08005e-05	0.00102607
bta-miR-6123	-9.54134	3.95495	1.20715e-05	0.00102607
bta-miR-7858	-8.75258	4.1412	2.53654e-05	0.00179672
bta-miR-32	-11.7784	5.22322	3.02742e-05	0.00183807
bta-miR-181b	-9.78821	7.27224	6.52653e-05	0.00346722
bta-miR-1246	-3.70583	10.1604	9.8341e-05	0.00464388
bta-miR-34a	-7.00492	4.68306	0.000264397	0.0112369
bta-miR-19a	-7.60736	3.90456	0.000305437	0.011801
bta-miR-7859	-9.35173	3.15555	0.000359906	0.0127467
bta-miR-11986c	11.2235	3.21549	0.000522611	0.0159037
bta-miR-345-3p	-9.27326	3.97465	0.000523885	0.0159037
bta-miR-2443	-7.70832	3.78423	0.000649907	0.0180783
bta-miR-126-5p	-9.93136	3.12191	0.000680595	0.0180783
bta-miR-2285p	-8.58347	2.73313	0.000822721	0.020568
bta-miR-2284ab	-7.71095	3.36481	0.00112514	0.0265658
bta-miR-378	-6.7794	3.50918	0.00136972	0.0306384
bta-miR-324	-7.72959	3.9803	0.00155277	0.0329963
bta-miR-345-5p	-7.94998	2.6218	0.00200495	0.039066
bta-miR-2284aa	-4.92622	3.95942	0.00207899	0.039066
bta-miR-2285y	-4.92687	3.95942	0.00211416	0.039066
bta-miR-6518	-6.67338	3.08489	0.0024352	0.0431233
bta-miR-217	-8.45828	0.932094	0.00259441	0.0441049
bta-miR-2455	-10.2568	1.92983	0.00282058	0.0461056
bta-miR-218	-7.00539	3.74817	0.00451128	0.0710109
bta-miR-146a	-1.80128	8.00281	0.00605222	0.091864
bta-miR-500	-7.78172	2.52394	0.00641627	0.0940315
bta-miR-2428	10.1805	6.66954	0.00670958	0.0950523
bta-miR-199a-3p	-8.68824	1.77903	0.00718964	0.0975839
bta-miR-3604	-8.68847	1.77903	0.00734749	0.0975839
bta-let-7b	0.521075	17.2925	0.00817406	0.103555
bta-miR-3596	0.521075	17.2925	0.00828438	0.103555
bta-miR-2447	-6.08245	4.5495	0.00928386	0.112733
bta-miR-301a	-8.1601	1.17493	0.0100073	0.118142
bta-miR-335	-3.80908	5.75447	0.0106641	0.122493
bta-miR-296-3p	6.17077	3.28325	0.0118626	0.132674
bta-miR-760-5p	8.46034	0.852864	0.0141179	0.150977
bta-miR-187	-7.73446	1.53608	0.0142096	0.150977
bta-miR-2285dc	-4.32627	1.12315	0.0147715	0.153119
bta-miR-877	-7.29494	1.59309	0.015501	0.156855
bta-miR-122	-7.6757	3.00216	0.0159735	0.157878
bta-miR-11978	-7.06537	4.44957	0.0167073	0.161053
bta-miR-12057	-5.9721	7.37542	0.0172925	0.161053
bta-miR-33a	-8.95612	2.62786	0.0174316	0.161053
bta-miR-2407	-6.02062	7.47223	0.0187079	0.169168
bta-miR-10179-5p	-6.56225	3.2658	0.0195408	0.173018
bta-miR-11985	-8.13003	1.13897	0.0206137	0.178792
bta-miR-2285bb	-5.64087	1.46985	0.0224159	0.190535
bta-miR-206	7.29905	8.83825	0.0237584	0.192661
bta-miR-99a-3p	-8.21488	0.648713	0.0240031	0.192661
bta-miR-31	-6.80423	2.06607	0.0244934	0.192661
bta-miR-545-5p	-6.81675	0.153582	0.0246664	0.192661
bta-miR-365-3p	-6.51165	2.11376	0.0249326	0.192661
bta-miR-1249	-6.43313	2.68181	0.025531	0.193762
bta-miR-12014	-5.64394	1.69961	0.026241	0.195328
bta-miR-2410	9.81792	2.12247	0.0270121	0.195328
bta-miR-6517	-7.07957	2.72298	0.0271162	0.195328
bta-miR-202	-7.63071	0.338046	0.0285772	0.202422
bta-miR-1264	-7.48349	2.06599	0.0296179	0.205705
bta-miR-28	-6.85337	2.79168	0.0302409	0.205705
bta-miR-137	-8.12849	0.584744	0.0315094	0.205705
bta-miR-2285q	-5.84398	2.09829	0.0316331	0.205705
bta-miR-30c	-2.09448	7.62863	0.0318781	0.205705
bta-miR-507b	-6.52555	2.61664	0.0319448	0.205705
bta-miR-12025	-7.68046	3.28621	0.0331154	0.210061
bta-miR-2285cl	-6.61383	2.77502	0.0337196	0.210747
bta-miR-106b	-7.11751	2.70231	0.034756	0.214077
bta-miR-1284	-7.47715	0.954245	0.0362624	0.217129
bta-miR-11980	1.23685	14.9735	0.0363844	0.217129
bta-miR-10172-3p	-6.62513	0.185201	0.0372102	0.217129
bta-miR-767	-7.20411	4.50721	0.0372951	0.217129
bta-miR-190b	-6.84809	0.103313	0.0392622	0.225493
bta-miR-449a	-1.65915	7.73062	0.0430546	0.243751
bta-miR-6529a	1.61243	6.88925	0.0437569	0.243751
bta-miR-507-3p	8.88507	1.25437	0.0441619	0.243751
bta-miR-215	-6.76799	0.960905	0.0460256	0.25078
bta-miR-6775	-6.39555	-0.418654	0.0474772	0.255415
bta-miR-2285cp	-4.83087	1.19157	0.0498922	0.263394
bta-miR-11995	-8.38872	0.579651	0.0502622	0.263394
bta-miR-1584-5p	5.43156	-0.23617	0.0512304	0.263394
bta-miR-135b	-2.57641	0.279367	0.0525057	0.263394
bta-miR-1777b	-5.18082	0.49961	0.0526008	0.263394
bta-miR-96	-2.60004	5.86571	0.0526788	0.263394
bta-miR-7180	9.26074	1.26966	0.0535229	0.264503
bta-miR-12055	-6.47177	-0.112035	0.0544277	0.265883
bta-miR-194b-3p	8.46923	0.757407	0.0573168	0.274501
bta-miR-375	2.48416	5.38574	0.0579563	0.274501
bta-miR-454	-6.58849	2.2086	0.0585089	0.274501
bta-miR-2388-3p	1.54985	9.79876	0.0593287	0.274501
bta-miR-2382-3p	-6.41954	2.34315	0.0594215	0.274501
bta-miR-2284c	-7.03868	0.288198	0.0608623	0.276185
bta-miR-2364	7.78051	0.857582	0.0610857	0.276185
bta-miR-6523a	-7.25554	2.12935	0.0651225	0.291338
bta-miR-2411-5p	-7.06493	0.991268	0.0670413	0.296797
bta-miR-2285db	-4.00447	0.717449	0.0698272	0.305944
bta-miR-2348	-4.53019	6.8549	0.07437	0.322523
bta-miR-21-5p	-0.843724	13.7808	0.0757558	0.325214
bta-miR-2284o	-5.9587	-0.276097	0.0789535	0.335553
bta-miR-205	-0.830711	11.7805	0.0798982	0.336205
bta-miR-11976	2.4383	5.94212	0.0917376	0.38224
bta-miR-7857-5p	-6.73001	0.605396	0.096275	0.395084
bta-miR-2285av	-3.36935	1.68402	0.0966794	0.395084
bta-miR-211	-2.25782	1.40693	0.0999909	0.40364
bta-miR-2284h-5p	-2.90585	0.64632	0.100672	0.40364
bta-miR-135a	-1.07245	10.1571	0.103687	0.406738
bta-miR-2411-3p	-8.15502	0.958254	0.104527	0.406738
bta-miR-2285b	3.72509	2.48631	0.105668	0.406738
bta-miR-2285r	1.4948	4.62171	0.106315	0.406738
bta-miR-11975	2.43819	5.85193	0.107684	0.406738
bta-miR-129	-5.98584	1.09503	0.108812	0.406738
bta-miR-129-5p	-5.98576	1.09503	0.109071	0.406738
bta-miR-2431-5p	-6.67716	0.615455	0.109102	0.406738
bta-miR-2448-3p	-4.60948	2.48627	0.114955	0.42309
bta-miR-141	-0.808278	12.0889	0.115479	0.42309
bta-miR-497	-6.11097	1.29193	0.118915	0.431956
bta-miR-2888	-4.19544	-0.447056	0.1202	0.432924
bta-miR-11997	-3.32838	4.33522	0.122171	0.436327
bta-miR-2285as	-2.2818	-0.0257909	0.124574	0.440219
bta-miR-2285x	-2.05728	2.40921	0.125333	0.440219
bta-miR-11996	-5.09824	-1.03687	0.129828	0.45227
bta-miR-320a	0.84807	11.3068	0.135914	0.469621
bta-miR-101	-1.23212	6.71736	0.13779	0.472263
bta-miR-2285au	-1.92539	3.39988	0.140848	0.478884
bta-miR-22-3p	1.16312	6.22541	0.144276	0.486644
bta-miR-2285dl-3p	2.48733	2.41296	0.146153	0.488374
bta-miR-10175-3p	3.77884	6.582	0.147087	0.488374
bta-miR-2285n	0.749859	11.1705	0.148914	0.490607
bta-miR-491	2.82923	3.92495	0.151269	0.492983
bta-miR-6526	-1.46632	5.29673	0.151955	0.492983
bta-miR-126-3p	-2.35933	6.2274	0.154133	0.494864
bta-miR-425-5p	-1.87638	4.44736	0.154863	0.494864
bta-miR-29d-5p	-1.09161	7.3989	0.157302	0.497026
bta-miR-149-3p	3.99347	3.29108	0.157879	0.497026
bta-miR-11988	3.86655	6.71597	0.160899	0.502809
bta-miR-30b-5p	-0.914865	7.74455	0.165153	0.512336
bta-miR-2483-5p	3.25196	2.11996	0.171923	0.528636
bta-miR-29b	-1.12162	9.55166	0.172895	0.528636
bta-let-7c	0.530527	14.3257	0.187538	0.569312
bta-miR-2358	1.93315	8.23384	0.189152	0.570138
bta-miR-183	0.76024	11.3039	0.191962	0.573399
bta-miR-2441	2.70598	4.028	0.192932	0.573399
bta-miR-2284x	-1.31946	6.98914	0.198217	0.582406
bta-miR-2361	4.70064	1.75821	0.199376	0.582406
bta-miR-2285dg	1.68893	1.9497	0.200996	0.582406
bta-miR-429	-0.827882	11.5199	0.201992	0.582406
bta-miR-11987	0.836553	12.0153	0.203419	0.582406
bta-miR-12036	-2.9521	-0.746241	0.204185	0.582406
bta-miR-210	-1.69221	5.79045	0.20661	0.585395
bta-miR-30e-5p	-0.745112	10.8608	0.211855	0.591624
bta-miR-3432a	0.636901	10.0839	0.212823	0.591624
bta-miR-1	-0.962837	12.8175	0.213738	0.591624
bta-miR-148a	0.491312	14.5468	0.214377	0.591624
bta-miR-3432b	1.5621	0.140574	0.21735	0.59596
bta-miR-1842	4.05259	2.50311	0.230187	0.621027
bta-miR-196a	1.34904	8.15427	0.230647	0.621027
bta-miR-2284w	2.04593	4.33484	0.232124	0.621027
bta-miR-6119-5p	1.47036	5.16279	0.232337	0.621027
bta-miR-11993	-4.65255	1.76654	0.237249	0.630193
bta-let-7e	0.496974	11.3173	0.242283	0.639567
bta-miR-2285e	3.02055	2.38548	0.2447	0.639957
bta-miR-107	-1.69691	7.96286	0.246926	0.639957
bta-miR-15b	-1.36832	8.11657	0.246948	0.639957
bta-miR-10182-5p	-3.2187	0.56204	0.250354	0.644852
bta-miR-10a	0.366293	14.842	0.255608	0.654297
bta-miR-200b	-0.529755	12.2936	0.258039	0.654297
bta-miR-184	-1.54318	9.59288	0.25864	0.654297
bta-miR-150	2.50807	3.5124	0.260574	0.65529
bta-miR-2285co	2.01134	0.19256	0.262941	0.657352
bta-miR-6522	3.51899	2.3154	0.276456	0.680295
bta-miR-1343-5p	2.30076	3.93442	0.276835	0.680295
bta-miR-30f	-0.726244	8.05722	0.27692	0.680295
bta-miR-423-3p	0.789409	7.36646	0.279069	0.681633
bta-miR-22-5p	3.00899	3.13946	0.286499	0.695442
bta-miR-20a	-1.16919	6.82015	0.287995	0.695442
bta-miR-200a	-0.392729	15.048	0.291589	0.699569
bta-miR-2889	1.63751	10.2854	0.292996	0.699569
bta-miR-2436-5p	2.32195	1.89899	0.295448	0.700792
bta-miR-16b	-0.978717	8.78077	0.296806	0.700792
bta-miR-93	-0.660501	8.02171	0.300034	0.701601
bta-miR-1468	0.836424	5.81532	0.3021	0.701601
bta-miR-2454-5p	1.95675	-0.100869	0.302101	0.701601
bta-miR-34b	2.04694	1.53759	0.303756	0.70161
bta-miR-128	-0.750948	6.78615	0.307787	0.707079
bta-let-7a-5p	0.273856	17.1336	0.317853	0.726277
bta-miR-6527	2.30084	2.37007	0.319869	0.726975
bta-miR-2285di	-1.07358	3.71669	0.325752	0.736406
bta-miR-378c	1.91683	1.18858	0.337471	0.758607
bta-miR-182	0.542283	11.3233	0.344007	0.758607
bta-miR-12059	1.90943	-0.639461	0.344824	0.758607
bta-miR-26b	-0.413073	12.979	0.345603	0.758607
bta-miR-2340	-1.77272	8.99787	0.348058	0.758607
bta-let-7g	-0.566305	9.76544	0.349767	0.758607
bta-miR-2346	2.88662	2.95044	0.350777	0.758607
bta-miR-2285l	1.25296	2.44635	0.352877	0.758607
bta-miR-423-5p	0.687264	10.8228	0.35342	0.758607
bta-miR-2284n	-0.625761	8.73923	0.354479	0.758607
bta-miR-1911	0.69675	6.53597	0.359092	0.758607
bta-miR-2285bv	-0.617372	8.75251	0.361437	0.758607
bta-miR-2900	-1.76357	-0.962629	0.362564	0.758607
bta-miR-10b	0.357533	13.8917	0.363214	0.758607
bta-miR-362-5p	1.56581	4.85764	0.364354	0.758607
bta-miR-2285t	2.5471	2.90351	0.365707	0.758607
bta-miR-1260b	1.1008	9.77782	0.36976	0.758607
bta-miR-874	1.91404	2.65214	0.376695	0.758607
bta-miR-186	-0.507771	8.98598	0.376789	0.758607
bta-miR-2284z	-0.588699	8.89305	0.377679	0.758607
bta-miR-2285by	0.629686	7.69006	0.377691	0.758607
bta-miR-223	2.01626	7.69625	0.380217	0.758607
bta-miR-18b	-1.70265	3.43459	0.380776	0.758607
bta-miR-2892	1.11536	5.42619	0.38442	0.758607
bta-miR-2442	-1.75107	-0.649312	0.385396	0.758607
bta-miR-2285bj	-1.05035	1.20887	0.388018	0.758607
bta-miR-2285bz	-1.74409	0.922394	0.389066	0.758607
bta-miR-2285ae	-1.36408	0.604306	0.390689	0.758607
bta-miR-11989	-1.74194	1.28397	0.391812	0.758607
bta-miR-99a-5p	0.476841	9.22834	0.393645	0.758607
bta-miR-2305	-1.66896	1.50237	0.394108	0.758607
bta-miR-2285ce	0.455878	11.8577	0.394823	0.758607
bta-miR-125b	0.214459	14.9915	0.394842	0.758607
bta-miR-671	-1.73736	1.42808	0.397566	0.758607
bta-miR-27b	-0.725525	9.60319	0.398045	0.758607
bta-miR-30a-5p	0.339082	11.9877	0.404724	0.762544
bta-miR-2304	2.60439	2.3688	0.405378	0.762544
bta-miR-2285bu	1.38108	1.66057	0.405494	0.762544
bta-miR-2285ap	1.85473	0.469782	0.409501	0.766687
bta-miR-146b	-1.32927	5.17543	0.415027	0.772133
bta-miR-2285cs	0.437261	11.8442	0.417353	0.772133
bta-miR-3613b	-1.66546	0.516677	0.417889	0.772133
bta-miR-326	-1.71903	0.0592555	0.419859	0.772133
bta-miR-2285cc	0.434895	11.8277	0.422696	0.772133
bta-miR-2285j	0.435644	11.7347	0.42331	0.772133
bta-miR-23a	-0.378337	11.8164	0.43052	0.781928
bta-miR-339b	-0.852049	7.3997	0.442543	0.795331
bta-miR-12056	-1.64061	2.18745	0.443301	0.795331
bta-miR-100	0.4851	10.4447	0.444453	0.795331
bta-miR-744	-0.658558	5.83159	0.447833	0.795331
bta-miR-2284d	0.554422	7.948	0.449077	0.795331
bta-miR-2284y	1.26064	3.39611	0.449128	0.795331
bta-miR-26c	-0.307614	12.863	0.453276	0.796511
bta-miR-2483-3p	1.81706	3.39714	0.456742	0.796511
bta-miR-652	1.59577	3.9289	0.458416	0.796511
bta-miR-331-3p	-0.822219	5.01281	0.45892	0.796511
bta-miR-181a	0.741929	8.53602	0.459213	0.796511
bta-miR-193a-5p	0.858288	5.05037	0.462035	0.796511
bta-miR-2285cf	1.40837	1.34395	0.462913	0.796511
bta-miR-2285bh	1.50955	1.77808	0.475408	0.808937
bta-miR-340	2.20714	1.72588	0.476535	0.808937
bta-miR-339a	-0.364657	10.638	0.477306	0.808937
bta-miR-2285ca	1.59862	1.51035	0.47837	0.808937
bta-miR-23b-3p	0.357255	11.6342	0.480989	0.808937
bta-miR-452	0.466796	8.35807	0.482583	0.808937
bta-miR-27a-3p	-1.1269	8.58467	0.483742	0.808937
bta-miR-2285bn	0.525453	7.12893	0.485362	0.808937
bta-miR-484	1.4418	3.78333	0.490548	0.81304
bta-miR-2285c	1.94838	0.133454	0.49165	0.81304
bta-miR-7865	1.50816	1.05128	0.494986	0.815384
bta-miR-204	-0.409383	8.25243	0.504709	0.827159
bta-miR-10174-3p	0.339201	11.6607	0.506027	0.827159
bta-miR-200c	0.24074	14.7403	0.510864	0.827555
bta-miR-2285ad	1.24015	1.94002	0.511953	0.827555
bta-miR-3613a	-1.51241	2.65313	0.51211	0.827555
bta-miR-190a	-1.076	4.3028	0.515861	0.829364
bta-miR-6528	1.71172	1.93788	0.517508	0.829364
bta-let-7d	-0.432369	7.83341	0.520894	0.829364
bta-miR-1306	0.561903	5.84323	0.521036	0.829364
bta-miR-11971	2.27725	2.05269	0.525353	0.833116
bta-miR-92b	1.11355	5.01021	0.536275	0.844545
bta-miR-19b	-0.680038	6.89862	0.53835	0.844545
bta-miR-92a	0.415863	8.87274	0.539366	0.844545
bta-miR-449b	-1.19513	-0.203941	0.540509	0.844545
bta-miR-6119-3p	-1.43137	3.26921	0.54479	0.848116
bta-miR-2284m	0.854271	0.791941	0.547175	0.848721
bta-miR-155	0.622735	5.08445	0.554193	0.854137
bta-miR-140	-0.455119	6.85014	0.556715	0.854137
bta-miR-103	0.296571	11.7249	0.558619	0.854137
bta-miR-3600	0.386684	8.53612	0.558706	0.854137
bta-miR-502a	0.912074	4.54131	0.565332	0.85608
bta-miR-6120-3p	-0.879417	4.44797	0.565493	0.85608
bta-miR-192	-0.576922	6.56345	0.567096	0.85608
bta-let-7a-3p	1.49206	2.95236	0.568239	0.85608
bta-miR-342	0.249099	11.6148	0.571761	0.85608
bta-miR-2431-3p	1.33085	2.57436	0.573925	0.85608
bta-miR-29d-3p	0.71588	3.89129	0.574077	0.85608
bta-miR-29c	0.225906	12.1854	0.58241	0.865469
bta-miR-2285at	0.581597	5.4129	0.586621	0.868689
bta-miR-2285be	0.454867	6.3527	0.593956	0.876498
bta-miR-1777a	-1.03108	7.12502	0.599473	0.881579
bta-miR-3065	1.43767	2.73215	0.604373	0.883669
bta-miR-338	1.43776	2.73215	0.605054	0.883669
bta-miR-628	1.23767	2.44131	0.608059	0.884558
bta-miR-2285f	0.412886	6.9712	0.609825	0.884558
bta-miR-669	-0.32713	8.43731	0.618606	0.892244
bta-miR-29e	-0.790567	3.34116	0.619322	0.892244
bta-miR-191	-0.202131	12.3969	0.628675	0.902659
bta-miR-2436-3p	1.02911	6.05349	0.631917	0.904259
bta-miR-34c	0.384802	7.75461	0.638223	0.910217
bta-miR-15a	-0.890795	3.25504	0.643362	0.910574
bta-miR-194	0.36574	5.82075	0.643591	0.910574
bta-miR-1298	0.278982	8.78229	0.644901	0.910574
bta-let-7f	0.191109	14.7307	0.656762	0.924251
bta-miR-574	-0.421849	9.67949	0.660281	0.925801
bta-miR-194b	1.5978	1.04418	0.66222	0.925801
bta-miR-2285bo	0.638079	1.63711	0.668748	0.92881
bta-miR-9-5p	-0.456678	6.80215	0.67122	0.92881
bta-miR-2285aa	0.716458	2.41879	0.671494	0.92881
bta-miR-151-3p	0.301326	10.3866	0.673114	0.92881
bta-miR-2285de	0.301819	6.94131	0.68364	0.940281
bta-miR-196b	0.28691	8.11043	0.691127	0.947285
bta-miR-3431	0.310679	9.05453	0.69319	0.947285
bta-miR-148d	0.30809	6.0955	0.696172	0.948311
bta-miR-421	-0.436672	5.19287	0.706821	0.959741
bta-miR-2285cr	0.497874	0.53742	0.70987	0.960812
bta-miR-2285aj-5p	-0.222351	8.68204	0.718703	0.968995
bta-miR-2285dd	0.27255	9.71893	0.720476	0.968995
bta-miR-2285ac	0.471735	-0.33112	0.724601	0.971469
bta-miR-17-5p	-0.497627	5.21702	0.732125	0.978468
bta-miR-221	-0.189988	10.212	0.739183	0.983014
bta-miR-99b	0.158783	10.4038	0.740151	0.983014
bta-miR-125a	0.12234	12.9854	0.750547	0.991332
bta-miR-11972	0.431141	4.10965	0.75108	0.991332
bta-miR-2890	0.656966	2.93791	0.753649	0.991644
bta-miR-148b	0.18029	9.30932	0.758756	0.995282
bta-miR-95	-0.308882	6.72987	0.768416	1
bta-miR-425-3p	0.584988	3.22323	0.770839	1
bta-miR-2285cb	0.382777	3.76864	0.782803	1
bta-miR-12030	-0.391283	2.94161	0.799336	1
bta-miR-2285aw	-0.330349	-0.123477	0.799734	1
bta-miR-1251	-0.406607	4.00853	0.801209	1
bta-miR-10167-3p	0.389736	7.87915	0.810026	1
bta-miR-2285bc	0.295578	2.54241	0.81656	1
bta-miR-411a	0.864351	1.43894	0.816594	1
bta-miR-2312	0.554277	-0.506934	0.819339	1
bta-miR-2284j	0.554642	-0.506934	0.819535	1
bta-miR-2285bq	0.468012	1.0471	0.820467	1
bta-miR-769	-0.284112	8.87684	0.822609	1
bta-miR-185	0.166135	6.28223	0.827312	1
bta-miR-1296	-0.333148	4.54006	0.827355	1
bta-miR-664b	0.684095	2.46874	0.830886	1
bta-miR-12034	-0.440651	0.417097	0.845756	1
bta-miR-374a	-0.263314	6.47016	0.848054	1
bta-miR-130a	-0.465152	4.12151	0.848751	1
bta-miR-532	0.176664	6.63895	0.850805	1
bta-miR-2325c	0.311929	7.16892	0.851723	1
bta-miR-16a	-0.0841737	12.5289	0.852518	1
bta-miR-2285ct	0.565412	2.06986	0.859296	1
bta-let-7i	0.121528	11.4454	0.864046	1
bta-miR-24-3p	0.184454	7.0158	0.866721	1
bta-miR-2285da	0.128801	9.75908	0.8671	1
bta-miR-660	-0.15297	7.02946	0.867112	1
bta-miR-7	-0.121015	11.7974	0.867204	1
bta-miR-132	0.411273	3.06659	0.868005	1
bta-miR-2285bf	0.122008	6.94814	0.872555	1
bta-miR-1307	-0.288123	7.73163	0.873486	1
bta-miR-152	0.096298	8.40656	0.881622	1
bta-miR-1291	0.275097	3.7267	0.886236	1
bta-miR-149-5p	0.368092	2.23545	0.888805	1
bta-miR-2284k	-0.0987603	7.10137	0.892849	1
bta-miR-11986b	0.195831	5.33549	0.894698	1
bta-miR-2419-5p	0.131956	5.58324	0.897027	1
bta-miR-12058	-0.269527	9.43621	0.899373	1
bta-miR-148c	0.0867395	7.90786	0.900598	1
bta-miR-2336	0.382054	2.70439	0.90095	1
bta-miR-328	-0.0929473	6.16604	0.906269	1
bta-miR-935	0.206707	0.821966	0.90879	1
bta-miR-2285ah-5p	0.227133	6.9855	0.909315	1
bta-miR-222	-0.0910566	6.24735	0.90979	1
bta-miR-483	0.359606	3.95749	0.912028	1
bta-miR-151-5p	-0.0795702	6.71254	0.920104	1
bta-miR-153	0.265903	1.6945	0.92931	1
bta-miR-25	-0.0460794	10.0449	0.931989	1
bta-miR-504	0.0964553	5.77584	0.935541	1
bta-miR-2285al-5p	-0.0804153	3.11062	0.944442	1
bta-miR-2285cm	-0.0712412	3.80395	0.947387	1
bta-miR-195	0.0887045	3.97777	0.948833	1
bta-miR-2285cq	0.0501217	6.60013	0.951696	1
bta-miR-1839	-0.0455968	6.75697	0.958653	1
bta-miR-499	0.116917	1.79723	0.966556	1
bta-miR-2285i	0.0693443	1.29571	0.966575	1
bta-miR-2285cd	0.0303166	4.04364	0.972604	1
bta-miR-29a	-0.0143592	10.9608	0.973896	1
bta-miR-98	0.0113549	9.59271	0.989788	1
bta-miR-361	-0.00920205	9.09071	0.992032	1
bta-miR-2285ba	0.0102759	3.0197	0.993087	1
bta-miR-30d	0.00321226	13.8849	0.993301	1
bta-miR-2285bl	0.0131355	2.62932	0.995133	1
bta-miR-224	0.00115742	7.73807	0.998753	1
bta-miR-27a-5p	0	1.23449	1	1
bta-miR-127	0	0.338485	1	1
bta-miR-139	0	1.05869	1	1
bta-miR-455-3p	0	0.243703	1	1
bta-miR-365-5p	0	-0.265812	1	1
bta-miR-105a	0	3.22459	1	1
bta-miR-130b	0	1.56935	1	1
bta-miR-143	0	3.78895	1	1
bta-miR-181d	0	0.25358	1	1
bta-miR-346	0	0.492262	1	1
bta-miR-760-3p	0	2.64919	1	1
bta-miR-2354	0	0.468437	1	1
bta-miR-2373-5p	0	0.91029	1	1
bta-miR-2284v	0	-0.103636	1	1
bta-miR-2409	0	5.68053	1	1
bta-miR-320b	0	-0.7194	1	1
bta-miR-2284r	0	1.37641	1	1
bta-miR-2467-3p	0	7.27328	1	1
bta-miR-2887	0	0.243423	1	1
bta-miR-4286	0	-0.656106	1	1
bta-miR-1247-5p	0	-0.894259	1	1
bta-miR-1247-3p	0	2.22172	1	1
bta-miR-2285u	0	0.352774	1	1
bta-miR-10185-5p	0	1.09158	1	1
bta-miR-2285ar	0	0.459516	1	1
bta-miR-2285ao	0	1.74482	1	1
bta-miR-9851	0	2.60542	1	1
bta-miR-11982	0	4.0883	1	1
bta-miR-11984	0	1.31081	1	1
bta-miR-2285bi	0	0.446881	1	1
bta-miR-11992	0	0.398885	1	1
bta-miR-2285cj	0	0.855822	1	1
bta-miR-2285cw	0	0.217437	1	1
bta-miR-12019	0	-0.902486	1	1
bta-miR-191b	0	1.29034	1	1
bta-miR-12061	0	1.48976	1	1
bta-miR-12062	0	2.10141	1	1

## Sheet: SPEvsS SEC
	logFC	logCPM	PValue	FDR
bta-miR-7859	-9.35173	3.15555	0.000726911	0.0857734
bta-miR-2285dc	-8.21384	1.12315	0.000781633	0.0857734
bta-miR-2340	6.80254	8.99787	0.000781921	0.0857734
bta-miR-6518	-8.9611	3.08489	0.000807279	0.0857734
bta-miR-2285r	-3.0217	4.62171	0.00272633	0.168699
bta-miR-9851	9.27151	2.60542	0.00368529	0.168699
bta-miR-10185-5p	6.81727	1.09158	0.00383683	0.168699
bta-miR-345-3p	-6.85612	3.97465	0.00403452	0.168699
bta-miR-2455	-10.2568	1.92983	0.00421552	0.168699
bta-miR-2441	8.48517	4.028	0.00427069	0.168699
bta-miR-217	-8.45828	0.932094	0.00452253	0.168699
bta-miR-365-5p	7.20487	-0.265812	0.00515686	0.168699
bta-miR-2483-5p	9.53205	2.11996	0.0051602	0.168699
bta-miR-760-3p	9.0241	2.64919	0.00593441	0.180152
bta-miR-2373-5p	8.79556	0.91029	0.00779996	0.220999
bta-miR-12030	-5.06387	2.94161	0.00901599	0.239487
bta-miR-2285bl	-8.32227	2.62932	0.0102759	0.244793
bta-miR-199a-3p	-8.68824	1.77903	0.0107984	0.244793
bta-miR-3604	-8.68847	1.77903	0.0110071	0.244793
bta-miR-130a	-9.20126	4.12151	0.0115197	0.244793
bta-miR-301a	-8.1601	1.17493	0.0149859	0.303138
bta-miR-2428	8.36097	6.66954	0.0163765	0.303138
bta-miR-2447	-6.08245	4.5495	0.0178899	0.303138
bta-miR-628	-8.1048	2.44131	0.0190397	0.303138
bta-miR-11982	9.62303	4.0883	0.0204278	0.303138
bta-miR-2436-3p	5.67106	6.05349	0.0209567	0.303138
bta-miR-187	-7.73446	1.53608	0.020996	0.303138
bta-miR-2348	-7.22712	6.8549	0.0212396	0.303138
bta-miR-153	6.54923	1.6945	0.0213688	0.303138
bta-miR-425-3p	-6.01158	3.22323	0.021398	0.303138
bta-miR-2285as	-4.09107	-0.0257909	0.023194	0.31238
bta-miR-2467-3p	6.85024	7.27328	0.0239361	0.31238
bta-miR-378c	7.8355	1.18858	0.0253262	0.31238
bta-miR-2436-5p	5.50225	1.89899	0.0256609	0.31238
bta-miR-2285q	-6.18684	2.09829	0.0259981	0.31238
bta-miR-345-5p	-4.77323	2.6218	0.0264604	0.31238
bta-miR-499	-8.56383	1.79723	0.0306518	0.314089
bta-miR-2285e	-7.33625	2.38548	0.0307406	0.314089
bta-miR-2285cw	7.8158	0.217437	0.0313185	0.314089
bta-miR-2407	-6.02062	7.47223	0.0314687	0.314089
bta-miR-99a-3p	-8.21488	0.648713	0.0322532	0.314089
bta-miR-375	2.83769	5.38574	0.0327233	0.314089
bta-miR-105a	6.71037	3.22459	0.0333054	0.314089
bta-let-7b	0.418337	17.2925	0.0335573	0.314089
bta-miR-3596	0.418337	17.2925	0.0338627	0.314089
bta-miR-12062	8.03243	2.10141	0.0354828	0.314089
bta-miR-500	-5.40986	2.52394	0.0358199	0.314089
bta-miR-31	-6.80423	2.06607	0.0360387	0.314089
bta-miR-545-5p	-6.81675	0.153582	0.0362126	0.314089
bta-miR-2285ad	4.23421	1.94002	0.0374001	0.317901
bta-miR-6517	-7.07957	2.72298	0.0384374	0.320312
bta-miR-27a-5p	6.75512	1.23449	0.0400226	0.327108
bta-miR-137	-8.12849	0.584744	0.0411912	0.330306
bta-miR-12025	-7.68046	3.28621	0.0440809	0.345277
bta-miR-11976	2.94541	5.94212	0.0461022	0.345277
bta-miR-365-3p	-5.65066	2.11376	0.0476148	0.345277
bta-miR-1284	-7.47715	0.954245	0.0481758	0.345277
bta-miR-2285bh	-5.13785	1.77808	0.0483681	0.345277
bta-miR-200c	0.725894	14.7403	0.0484559	0.345277
bta-miR-767	-7.20411	4.50721	0.05026	0.345277
bta-miR-12057	4.07407	7.37542	0.0504909	0.345277
bta-miR-2285t	-7.05672	2.90351	0.0505853	0.345277
bta-miR-125b	-0.491996	14.9915	0.0514034	0.345277
bta-miR-10172-3p	-6.62513	0.185201	0.0519946	0.345277
bta-miR-190b	-6.84809	0.103313	0.0535806	0.350335
bta-miR-34b	-4.53818	1.53759	0.0574155	0.366911
bta-miR-149-5p	-6.41766	2.23545	0.0578425	0.366911
bta-miR-1777b	-5.18377	0.49961	0.0603198	0.370566
bta-miR-2285ct	-8.04438	2.06986	0.0604826	0.370566
bta-miR-215	-6.76799	0.960905	0.0616903	0.370566
bta-miR-11995	-8.38872	0.579651	0.0619063	0.370566
bta-miR-2364	7.65402	0.857582	0.0636996	0.373305
bta-miR-6775	-6.39555	-0.418654	0.0649057	0.373305
bta-miR-2285ao	4.7255	1.74482	0.0649991	0.373305
bta-miR-339b	-2.11168	7.3997	0.0662756	0.375562
bta-miR-2284v	6.36378	-0.103636	0.0710113	0.397103
bta-miR-6528	-6.1169	1.93788	0.0720296	0.397566
bta-miR-2285bq	3.83906	1.0471	0.0763219	0.41497
bta-miR-2382-3p	-6.41954	2.34315	0.0783388	0.41497
bta-miR-206	5.15514	8.83825	0.0786896	0.41497
bta-miR-2284ab	2.97037	3.36481	0.0790885	0.41497
bta-miR-6522	-6.53204	2.3154	0.0837935	0.430533
bta-miR-2411-5p	-7.06493	0.991268	0.0840805	0.430533
bta-miR-2285bz	4.60612	0.922394	0.0887707	0.448266
bta-miR-3613a	-4.51088	2.65313	0.0896532	0.448266
bta-miR-491	3.33334	3.92495	0.0977084	0.47833
bta-miR-411a	-7.9433	1.43894	0.097917	0.47833
bta-miR-2454-5p	4.13961	-0.100869	0.100816	0.48155
bta-miR-11975	2.49654	5.85193	0.101125	0.48155
bta-miR-202	-5.34244	0.338046	0.101975	0.48155
bta-miR-2285db	-4.00447	0.717449	0.110491	0.516031
bta-miR-12059	4.77587	-0.639461	0.111706	0.516032
bta-miR-2285ca	-4.18868	1.51035	0.114875	0.524968
bta-miR-7857-5p	-6.73001	0.605396	0.116952	0.528772
bta-miR-2411-3p	-8.15502	0.958254	0.120755	0.537791
bta-miR-194b	-6.87125	1.04418	0.121478	0.537791
bta-miR-29c	-0.634458	12.1854	0.123866	0.537945
bta-miR-2285bu	-2.80685	1.66057	0.124044	0.537945
bta-miR-6120-3p	2.42527	4.44797	0.1289	0.547129
bta-miR-2431-5p	-6.67716	0.615455	0.130728	0.547129
bta-miR-2285de	-1.1284	6.94131	0.133349	0.547129
bta-miR-129	-5.98584	1.09503	0.134091	0.547129
bta-miR-129-5p	-5.98576	1.09503	0.134365	0.547129
bta-miR-99a-5p	0.837021	9.22834	0.136136	0.547129
bta-miR-11978	-3.92121	4.44957	0.136162	0.547129
bta-miR-194	-1.19621	5.82075	0.13646	0.547129
bta-miR-146a	-0.917973	8.00281	0.152675	0.599088
bta-miR-339a	-0.735027	10.638	0.153793	0.599088
bta-miR-181a	1.44355	8.53602	0.155719	0.599088
bta-miR-2285x	-1.91957	2.40921	0.157696	0.599088
bta-miR-184	-1.95095	9.59288	0.158539	0.599088
bta-miR-2285di	-1.57806	3.71669	0.159221	0.599088
bta-miR-2888	-3.8106	-0.447056	0.163173	0.599088
bta-miR-92a	0.951193	8.87274	0.163346	0.599088
bta-miR-11996	-5.09824	-1.03687	0.163428	0.599088
bta-miR-340	-4.88272	1.72588	0.16631	0.599088
bta-miR-183	0.806495	11.3039	0.166612	0.599088
bta-miR-191	-0.578638	12.3969	0.167532	0.599088
bta-miR-2898	0.617412	16.1597	0.167745	0.599088
bta-miR-1246	-1.18567	10.1604	0.170892	0.605243
bta-miR-11997	-3.32838	4.33522	0.177787	0.624459
bta-miR-2285av	2.45667	1.68402	0.181771	0.630631
bta-miR-2443	2.0313	3.78423	0.182512	0.630631
bta-miR-191b	3.15261	1.29034	0.187874	0.643924
bta-miR-11984	3.17236	1.31081	0.191511	0.650676
bta-miR-2284h-5p	-2.31524	0.64632	0.192906	0.650676
bta-miR-760-5p	3.17965	0.852864	0.204155	0.683195
bta-miR-10175-3p	3.18	6.582	0.209803	0.69661
bta-miR-26b	-0.545806	12.979	0.213277	0.702312
bta-miR-2285bj	-1.59123	1.20887	0.214825	0.702312
bta-miR-423-5p	0.908288	10.8228	0.221642	0.719066
bta-miR-423-3p	0.883479	7.36646	0.226588	0.729545
bta-miR-11972	-1.67898	4.10965	0.230009	0.734993
bta-miR-223	2.8255	7.69625	0.233356	0.740121
bta-miR-2892	1.53358	5.42619	0.236955	0.741343
bta-miR-30b-5p	-0.777338	7.74455	0.237407	0.741343
bta-miR-190a	-2.00266	4.3028	0.238974	0.741343
bta-miR-11986c	2.36773	3.21549	0.243591	0.75019
bta-miR-93	-0.7362	8.02171	0.248764	0.760609
bta-miR-196a	1.2913	8.15427	0.250656	0.76092
bta-miR-152	-0.741688	8.40656	0.254302	0.766514
bta-miR-2285bc	1.44536	2.54241	0.261577	0.777163
bta-miR-11992	3.23711	0.398885	0.263546	0.777163
bta-miR-1249	2.61985	2.68181	0.263766	0.777163
bta-miR-186	-0.638228	8.98598	0.267514	0.777163
bta-miR-19b	-1.23781	6.89862	0.267812	0.777163
bta-miR-148c	-0.773013	7.90786	0.268807	0.777163
bta-miR-1298	0.66797	8.78229	0.271635	0.780033
bta-miR-150	-2.50178	3.5124	0.275665	0.786294
bta-miR-2889	1.68122	10.2854	0.281046	0.796296
bta-miR-11988	2.81528	6.71597	0.285337	0.802781
bta-miR-12014	2.14108	1.69961	0.287112	0.802781
bta-miR-126-3p	-1.70982	6.2274	0.291541	0.809837
bta-miR-6529a	0.819207	6.88925	0.297807	0.821869
bta-miR-181b	1.62605	7.27224	0.301112	0.825629
bta-miR-10182-5p	-3.2187	0.56204	0.304184	0.828517
bta-miR-19a	-1.62558	3.90456	0.306064	0.828517
bta-miR-1291	-2.47437	3.7267	0.309187	0.831134
bta-miR-7858	-1.4556	4.1412	0.311815	0.831134
bta-let-7a-3p	2.74314	2.95236	0.315358	0.831134
bta-miR-296-3p	-2.49849	3.28325	0.315434	0.831134
bta-miR-2285ac	-1.73928	-0.33112	0.316809	0.831134
bta-miR-21-5p	0.470832	13.7808	0.31935	0.831811
bta-let-7c	0.399017	14.3257	0.321004	0.831811
bta-miR-100	0.626658	10.4447	0.324036	0.831811
bta-miR-2285l	1.34179	2.44635	0.324896	0.831811
bta-miR-2284m	1.40763	0.791941	0.330779	0.841802
bta-miR-12034	-2.41353	0.417097	0.336817	0.846188
bta-miR-2442	-2.07745	-0.649312	0.338923	0.846188
bta-miR-10167-3p	1.58521	7.87915	0.339912	0.846188
bta-miR-27a-3p	-1.54992	8.58467	0.341671	0.846188
bta-miR-1251	-1.57002	4.00853	0.342457	0.846188
bta-miR-1	-0.723761	12.8175	0.348087	0.855127
bta-miR-454	2.76636	2.2086	0.36403	0.88597
bta-miR-24-3p	1.00557	7.0158	0.364811	0.88597
bta-miR-7180	2.20143	1.26966	0.367953	0.888524
bta-miR-10a	0.288524	14.842	0.3703	0.889139
bta-let-7a-5p	0.240881	17.1336	0.379537	0.901221
bta-miR-483	-2.4367	3.95749	0.379573	0.901221
bta-miR-148a	0.338695	14.5468	0.391442	0.913377
bta-miR-146b	-1.40261	5.17543	0.391818	0.913377
bta-miR-182	0.490046	11.3233	0.39225	0.913377
bta-miR-92b	1.54343	5.01021	0.396174	0.913377
bta-miR-30f	-0.565009	8.05722	0.396923	0.913377
bta-miR-2284aa	1.11793	3.95942	0.398694	0.913377
bta-miR-2285y	1.11759	3.95942	0.399737	0.913377
bta-miR-2284w	-1.42078	4.33484	0.402379	0.914497
bta-miR-2285n	-0.427454	11.1705	0.409054	0.92343
bta-miR-211	-1.10452	1.40693	0.410673	0.92343
bta-miR-2285ah-5p	1.91332	6.9855	0.413144	0.92343
bta-miR-2285cr	-1.16411	0.53742	0.415001	0.92343
bta-miR-2285dl-3p	-1.36133	2.41296	0.422858	0.934606
bta-let-7e	0.333203	11.3173	0.432479	0.934606
bta-miR-2361	2.60922	1.75821	0.43358	0.934606
bta-miR-2900	-1.76357	-0.962629	0.433969	0.934606
bta-let-7i	0.555736	11.4454	0.434966	0.934606
bta-miR-574	-0.750448	9.67949	0.436155	0.934606
bta-miR-132	1.97856	3.06659	0.440257	0.934606
bta-miR-10b	0.300198	13.8917	0.445032	0.934606
bta-miR-196b	0.550995	8.11043	0.44646	0.934606
bta-miR-7865	-1.70597	1.05128	0.448004	0.934606
bta-miR-6119-3p	-1.80791	3.26921	0.44944	0.934606
bta-miR-11989	1.93432	1.28397	0.449491	0.934606
bta-miR-29d-5p	-0.579001	7.3989	0.449716	0.934606
bta-miR-18b	-1.70265	3.43459	0.45081	0.934606
bta-miR-2312	-1.74457	-0.506934	0.45626	0.937439
bta-miR-2284j	-1.74428	-0.506934	0.456588	0.937439
bta-miR-671	-1.73736	1.42808	0.464095	0.941535
bta-miR-2285cm	-0.803028	3.80395	0.464465	0.941535
bta-miR-331-3p	-0.80979	5.01281	0.466838	0.941535
bta-miR-10179-5p	1.58019	3.2658	0.467444	0.941535
bta-miR-28	1.79749	2.79168	0.477904	0.949785
bta-miR-2285p	-1.23792	2.73313	0.479207	0.949785
bta-miR-3613b	-1.66546	0.516677	0.482786	0.949785
bta-miR-326	-1.71903	0.0592555	0.483222	0.949785
bta-miR-30c	-0.657714	7.62863	0.484994	0.949785
bta-miR-22-5p	1.88306	3.13946	0.485823	0.949785
bta-miR-324	1.15703	3.9803	0.487184	0.949785
bta-miR-122	1.63358	3.00216	0.499544	0.964045
bta-miR-2284k	-0.494864	7.10137	0.501463	0.964045
bta-miR-11987	0.439039	12.0153	0.503102	0.964045
bta-miR-12056	-1.64061	2.18745	0.504551	0.964045
bta-miR-101	-0.541489	6.71736	0.509225	0.964045
bta-miR-192	-0.666461	6.56345	0.509311	0.964045
bta-miR-335	-0.879749	5.75447	0.512465	0.964045
bta-miR-3431	-0.51487	9.05453	0.514117	0.964045
bta-miR-151-5p	-0.516359	6.71254	0.516832	0.964045
bta-miR-2285i	-1.66953	1.29571	0.517962	0.964045
bta-miR-652	1.36716	3.9289	0.522983	0.964045
bta-miR-155	0.672695	5.08445	0.524063	0.964045
bta-miR-2388-3p	0.513337	9.79876	0.525929	0.964045
bta-miR-532	-0.590972	6.63895	0.531266	0.964045
bta-miR-125a	-0.239728	12.9854	0.533504	0.964045
bta-miR-135b	-0.76684	0.279367	0.534414	0.964045
bta-miR-6123	0.829526	3.95495	0.535462	0.964045
bta-miR-210	-0.805023	5.79045	0.539612	0.964045
bta-miR-15b	-0.710836	8.11657	0.542565	0.964045
bta-miR-3065	1.7001	2.73215	0.543197	0.964045
bta-miR-338	1.70018	2.73215	0.543963	0.964045
bta-miR-29a	-0.26244	10.9608	0.550132	0.964045
bta-miR-1307	-1.09095	7.73163	0.552164	0.964045
bta-miR-141	0.302073	12.0889	0.554165	0.964045
bta-miR-2325c	-1.01693	7.16892	0.554233	0.964045
bta-miR-874	1.25899	2.65214	0.555873	0.964045
bta-miR-222	-0.473777	6.24735	0.556851	0.964045
bta-miR-7	-0.424754	11.7974	0.558012	0.964045
bta-miR-2285by	0.413841	7.69006	0.561339	0.965867
bta-miR-1260b	0.701923	9.77782	0.564372	0.96717
bta-miR-2284d	-0.414227	7.948	0.571723	0.973029
bta-miR-195	0.784542	3.97777	0.57237	0.973029
bta-miR-29e	0.893774	3.34116	0.575556	0.974546
bta-miR-204	-0.337677	8.25243	0.582106	0.974653
bta-miR-2285b	1.16362	2.48631	0.583106	0.974653
bta-miR-449b	1.02443	-0.203941	0.583319	0.974653
bta-miR-2285ae	-0.880596	0.604306	0.584792	0.974653
bta-miR-6119-5p	0.649377	5.16279	0.592248	0.980554
bta-miR-3432b	0.729606	0.140574	0.594286	0.980554
bta-miR-935	0.909912	0.821966	0.595254	0.980554
bta-miR-2285dd	-0.394098	9.71893	0.605285	0.989462
bta-miR-2336	1.62475	2.70439	0.605318	0.989462
bta-miR-3432a	0.258719	10.0839	0.611706	0.996073
bta-miR-342	0.221912	11.6148	0.614421	0.996676
bta-miR-2285c	1.47507	0.133454	0.617765	0.998289
bta-miR-452	-0.325286	8.35807	0.624524	1
bta-miR-769	-0.623485	8.87684	0.625859	1
bta-miR-30e-5p	-0.28495	10.8608	0.631457	1
bta-miR-148d	0.377488	6.0955	0.632834	1
bta-miR-664b	-1.5306	2.46874	0.639776	1
bta-miR-11971	1.63404	2.05269	0.641784	1
bta-miR-2285aj-5p	-0.28365	8.68204	0.646106	1
bta-miR-2448-3p	1.14627	2.48627	0.652567	1
bta-miR-1343-5p	-0.921229	3.93442	0.652834	1
bta-miR-128	0.327368	6.78615	0.655052	1
bta-miR-2285j	-0.240656	11.7347	0.657885	1
bta-miR-3600	-0.29119	8.53612	0.65969	1
bta-miR-2285cd	-0.386667	4.04364	0.664611	1
bta-miR-29b	-0.350685	9.55166	0.666572	1
bta-miR-421	-0.500937	5.19287	0.666981	1
bta-miR-361	-0.395423	9.09071	0.668405	1
bta-miR-193a-5p	-0.498315	5.05037	0.668725	1
bta-miR-374a	-0.588418	6.47016	0.669479	1
bta-miR-2285ba	-0.507818	3.0197	0.670021	1
bta-miR-2346	1.23739	2.95044	0.67197	1
bta-miR-1842	1.27519	2.50311	0.674805	1
bta-miR-2285da	-0.322725	9.75908	0.675339	1
bta-let-7g	-0.251297	9.76544	0.677441	1
bta-miR-425-5p	-0.52916	4.44736	0.68027	1
bta-miR-96	0.498972	5.86571	0.693581	1
bta-miR-1468	-0.301916	5.81532	0.708756	1
bta-miR-1306	0.325396	5.84323	0.709729	1
bta-miR-2285ce	-0.19792	11.8577	0.711388	1
bta-miR-2285bf	-0.280383	6.94814	0.712828	1
bta-miR-2285cs	-0.197935	11.8442	0.713144	1
bta-miR-34c	-0.300015	7.75461	0.713986	1
bta-miR-669	-0.240504	8.43731	0.714308	1
bta-miR-2285cc	-0.19731	11.8277	0.715671	1
bta-miR-2478	0.211204	16.6951	0.71582	1
bta-miR-2284y	0.5921	3.39611	0.719799	1
bta-miR-95	-0.375544	6.72987	0.720545	1
bta-miR-2285be	-0.303339	6.3527	0.72233	1
bta-miR-2285bv	-0.238939	8.75251	0.723101	1
bta-miR-2284n	-0.232633	8.73923	0.729831	1
bta-miR-2890	0.679748	2.93791	0.745727	1
bta-miR-2284z	-0.215693	8.89305	0.745815	1
bta-miR-106b	0.836337	2.70231	0.746915	1
bta-miR-16a	0.144478	12.5289	0.749693	1
bta-miR-15a	0.611536	3.25504	0.74972	1
bta-miR-107	0.448254	7.96286	0.753844	1
bta-miR-99b	0.14919	10.4038	0.755357	1
bta-miR-2285cf	0.625447	1.34395	0.758356	1
bta-miR-34a	-0.432468	4.68306	0.760791	1
bta-miR-507b	-0.72351	2.61664	0.760805	1
bta-miR-2483-3p	-0.724571	3.39714	0.761121	1
bta-miR-149-3p	0.765377	3.29108	0.764285	1
bta-miR-449a	-0.238915	7.73062	0.764926	1
bta-miR-2419-5p	0.303295	5.58324	0.766388	1
bta-miR-2285aw	-0.393774	-0.123477	0.775072	1
bta-miR-744	-0.242289	5.83159	0.779393	1
bta-miR-197	0.227689	5.79749	0.78373	1
bta-miR-9-5p	-0.290289	6.80215	0.787094	1
bta-miR-6523a	0.845176	2.12935	0.793045	1
bta-miR-23b-3p	0.132206	11.6342	0.794212	1
bta-miR-12058	0.556947	9.43621	0.794611	1
bta-miR-12055	0.719859	-0.112035	0.795662	1
bta-miR-140	-0.198089	6.85014	0.797835	1
bta-miR-2285bb	-0.503363	1.46985	0.799462	1
bta-miR-502a	-0.397362	4.54131	0.801114	1
bta-miR-374b	0.246579	4.70229	0.803776	1
bta-miR-2358	0.337136	8.23384	0.813494	1
bta-miR-11980	-0.134291	14.9735	0.817906	1
bta-miR-6526	-0.2284	5.29673	0.819907	1
bta-miR-362-5p	0.377287	4.85764	0.823885	1
bta-miR-2285cl	0.5252	2.77502	0.828058	1
bta-miR-2284c	-0.674281	0.288198	0.828488	1
bta-miR-378	-0.34827	3.50918	0.828548	1
bta-miR-29d-3p	-0.274093	3.89129	0.829107	1
bta-miR-1839	0.18286	6.75697	0.835545	1
bta-miR-22-3p	0.160173	6.22541	0.838982	1
bta-miR-2305	0.363345	1.50237	0.845525	1
bta-miR-2285dg	-0.260051	1.9497	0.846394	1
bta-miR-185	-0.147446	6.28223	0.846792	1
bta-miR-484	0.396708	3.78333	0.847127	1
bta-miR-26c	0.0740715	12.863	0.856567	1
bta-miR-320a	0.0998916	11.3068	0.859712	1
bta-miR-16b	-0.163231	8.78077	0.8606	1
bta-miR-2304	0.511947	2.3688	0.863212	1
bta-miR-148b	0.10068	9.30932	0.863838	1
bta-miR-2431-3p	-0.39904	2.57436	0.864559	1
bta-miR-224	0.124962	7.73807	0.86602	1
bta-miR-497	0.537637	1.29193	0.866223	1
bta-miR-200a	0.0614059	15.048	0.868828	1
bta-miR-2285cp	0.344166	1.19157	0.869361	1
bta-miR-328	-0.11969	6.16604	0.87963	1
bta-miR-98	0.133849	9.59271	0.880103	1
bta-miR-1777a	-0.270129	7.12502	0.886378	1
bta-miR-103	-0.0715471	11.7249	0.887706	1
bta-miR-2285at	-0.148419	5.4129	0.889701	1
bta-miR-10174-3p	0.0698655	11.6607	0.891002	1
bta-miR-218	-0.250939	3.74817	0.89246	1
bta-miR-504	0.159816	5.77584	0.893539	1
bta-miR-877	-0.302695	1.59309	0.894228	1
bta-miR-27b	0.113106	9.60319	0.894651	1
bta-miR-2284o	0.384365	-0.276097	0.895378	1
bta-miR-20a	-0.133063	6.82015	0.902471	1
bta-miR-23a	-0.0584881	11.8164	0.902906	1
bta-miR-429	0.0768715	11.5199	0.905063	1
bta-miR-200b	0.055617	12.2936	0.905219	1
bta-miR-660	-0.10107	7.02946	0.912015	1
bta-miR-17-5p	-0.141045	5.21702	0.922548	1
bta-miR-1911	-0.0694781	6.53597	0.92693	1
bta-miR-33a	-0.232109	2.62786	0.932204	1
bta-miR-205	0.038069	11.7805	0.935607	1
bta-miR-2285au	0.10165	3.39988	0.935698	1
bta-miR-32	0.136601	5.22322	0.936049	1
bta-miR-1264	0.211157	2.06599	0.936531	1
bta-miR-30a-5p	-0.0309259	11.9877	0.939361	1
bta-miR-12036	0.163699	-0.746241	0.939624	1
bta-miR-2285aa	0.129494	2.41879	0.940384	1
bta-miR-11993	0.218421	1.76654	0.948481	1
bta-miR-1296	-0.0896595	4.54006	0.953154	1
bta-miR-2285cq	0.0451324	6.60013	0.956511	1
bta-miR-2285bn	0.039339	7.12893	0.958299	1
bta-miR-2285al-5p	-0.0548843	3.11062	0.962215	1
bta-miR-221	-0.0246157	10.212	0.965585	1
bta-let-7f	0.0163265	14.7307	0.969705	1
bta-miR-30d	0.0144679	13.8849	0.969837	1
bta-miR-2285cb	0.0485372	3.76864	0.972193	1
bta-miR-2285bo	-0.0334374	1.63711	0.981714	1
bta-let-7d	-0.0134759	7.83341	0.98401	1
bta-miR-11986b	0.027685	5.33549	0.985075	1
bta-miR-135a	-0.0104615	10.1571	0.987192	1
bta-miR-2284x	0.0155435	6.98914	0.987702	1
bta-miR-11985	-0.0315779	1.13897	0.990436	1
bta-miR-2285f	0.0073983	6.9712	0.992702	1
bta-miR-126-5p	0.0150626	3.12191	0.99368	1
bta-miR-151-3p	-0.00532443	10.3866	0.994047	1
bta-miR-25	-0.00220897	10.0449	0.996736	1
bta-miR-127	0	0.338485	1	1
bta-miR-139	0	1.05869	1	1
bta-miR-455-3p	0	0.243703	1	1
bta-miR-130b	0	1.56935	1	1
bta-miR-143	0	3.78895	1	1
bta-miR-181d	0	0.25358	1	1
bta-miR-346	0	0.492262	1	1
bta-miR-2354	0	0.468437	1	1
bta-miR-2409	0	5.68053	1	1
bta-miR-2410	0	2.12247	1	1
bta-miR-1584-5p	0	-0.23617	1	1
bta-miR-320b	0	-0.7194	1	1
bta-miR-2284r	0	1.37641	1	1
bta-miR-2887	0	0.243423	1	1
bta-miR-4286	0	-0.656106	1	1
bta-miR-1247-5p	0	-0.894259	1	1
bta-miR-1247-3p	0	2.22172	1	1
bta-miR-6527	0	2.37007	1	1
bta-miR-2285u	0	0.352774	1	1
bta-miR-507-3p	0	1.25437	1	1
bta-miR-194b-3p	0	0.757407	1	1
bta-miR-2285ar	0	0.459516	1	1
bta-miR-2285ap	0	0.469782	1	1
bta-miR-2285bi	0	0.446881	1	1
bta-miR-2285cj	0	0.855822	1	1
bta-miR-2285co	0	0.19256	1	1
bta-miR-12019	0	-0.902486	1	1
bta-miR-12061	0	1.48976	1	1
